# Supplementary material for: Copper-catalyzed enantioselective carbenoid insertion into S–H bonds
Source: Royal Society of Chemistry journal article supplement (doi:10.1039/b911670b), 2009-01-01
Supplement: b911670b.pdf [file b911670b.pdf]

Supporting Information for:

## Copper-Catalyzed Enantioselective Carbenoid Insertion into S–H Bonds

Yong-Zhen Zhang, Shou-Fei Zhu, Yan Cai, Hong-Xiang Mao, Qi-Lin Zhou \*

State Key Laboratory and Institute of Elemento-organic Chemistry, Nankai University,  
Tianjin 300071, China

### Contents:

**Typical Procedure for Cu-Catalyzed S–H Insertion**

**Analytical Data for S–H Insertion Products**

**Preparation of (+)-Benzyl 2-Mercaptopropionate**

**NMR Spectra of New S–H Insertion Products**

**HPLC and SFC Charts for S–H Insertion Products**

**General.** All reactions and manipulations were performed using standard Schlenk techniques. THF was distilled from sodium benzophenone ketyl. CH<sub>2</sub>Cl<sub>2</sub>, CHCl<sub>3</sub>, DCE were distilled over CaH<sub>2</sub> under nitrogen atmosphere. CuCl and CuPF<sub>6</sub>(MeCN)<sub>4</sub> were prepared according to the literature procedure.<sup>1</sup> Spirobox ligands <sup>2</sup> were prepared according to the previous procedure. Mercaptans, CuBr<sub>2</sub> and Cu(OTf)<sub>2</sub> were purchased from Aldrich and used directly. NMR spectra were recorded with a Bruker AV 300 spectrometer at 300/400 MHz (<sup>1</sup>H NMR), 75/100 MHz (<sup>13</sup>C NMR) or a Varian Mercury Plus 400 spectrometer at 400 MHz (<sup>1</sup>H NMR), 100 MHz (<sup>13</sup>C NMR). Chemical shifts were reported in ppm down field from internal Me<sub>4</sub>Si. Optical rotations were measured using a Perkin Elmer Model 341 polarimeter. HRMS were recorded on IonSpec FT-ICR mass spectrometer with ESI resource. HPLC analyses were performed on a Hewlett Packard Model HP 1100 Series or Waters 2996 chromatography. SFC (Super Fluent Chromatography) analyses were performed on Agilent 1200 Series.

<sup>1</sup> R. N. Keller, H. Wycoff, D. *Inorg. Synth.* **1946**, 2, 1–4.

<sup>2</sup> B. Liu, S.-F. Zhu, W. Zhang, C. Chen, Q.-L. Zhou, *J. Am. Chem. Soc.* **2007**, 129, 5834–5835.

## 1. Typical Procedure for Cu-Catalyzed S–H Insertion

A solution of CuCl (1.0 mg, 0.01 mmol, 5 mol%), NaBAR<sub>F</sub> (11.3 mg, 0.012 mmol, 6 mol%) and (*S,S,S,S*)-**4a** (6.1 mg, 0.012 mmol, 6 mol%) in CHCl<sub>3</sub> (2 mL) was stirred for 2 hours under an argon atmosphere. The solution was heated to 80 °C, mercaptan (0.2 mmol, 1 equiv.) and diazo compound (0.2 mmol, 1 equiv.) were added subsequently. The resulting solution was stirred at 80 °C for 0.5–2 hours until the diazo compound disappeared. The product was purified by flash chromatography with ethyl acetate/petroleum ether (1:20, v/v).

## 2. Analytical Data for S–H Insertion Products

### (+)-benzyl 2-(benzylthio)propionate (**3a**)

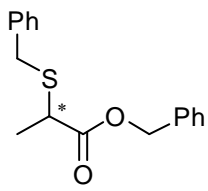 Colorless oil; 82% yield; <sup>1</sup>H NMR (400 MHz, CDCl<sub>3</sub>) δ 7.39–7.22 (m, 10H), 5.18 (d, *J* = 12.4 Hz, 1H), 5.12 (d, *J* = 12.4 Hz, 1H), 3.79 (d, *J* = 12.4 Hz, 1H), 3.73 (d, *J* = 12.4 Hz, 1H), 3.32 (q, *J* = 7.2 Hz, 1H), 1.40 (d, *J* = 7.2 Hz, 3H); <sup>13</sup>C NMR (100 MHz, CDCl<sub>3</sub>) δ 172.9, 137.5, 135.8, 129.1, 128.6, 128.5, 128.4, 128.3, 127.2, 66.8, 40.4, 35.9, 16.9; HRMS (ESI) Calcd for (C<sub>17</sub>H<sub>18</sub>O<sub>2</sub>S + Na)<sup>+</sup>: 309.0920, Found 309.0925; 81% ee [HPLC condition: Chiralcel OJ-H column, *n*-Hexane/*i*-PrOH = 90:10, flow rate = 1.0 mL/min, wavelength = 220 nm, *t*<sub>R</sub> = 14.28 min for major isomer, *t*<sub>R</sub> = 15.47 min for minor isomer]; [α]<sub>D</sub><sup>20</sup> = +170.6 (*c* 1.0, MeOH).

### (*R*)-ethyl 2-(benzylthio)propionate (**3b**)<sup>3</sup>

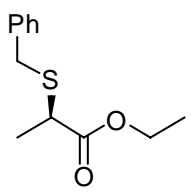 Colorless oil; 91% yield; <sup>1</sup>H NMR (400 MHz, CDCl<sub>3</sub>) δ 7.28–7.15 (m, 5H), 4.16–4.05 (m, 2H), 3.80 (d, *J* = 13.2 Hz, 1H), 3.72 (d, *J* = 13.2 Hz, 1H), 3.21 (q, *J* = 7.2 Hz, 2H), 1.31 (d, *J* = 7.2 Hz, 3H), 1.23 (t, *J* = 7.2 Hz, 3H); 73 % ee [HPLC condition: Chiralcel OJ-H column, *n*-Hexane/*i*-PrOH = 90:10, flow rate = 1.0 mL/min, wavelength = 210 nm, *t*<sub>R</sub> = 7.78 min for minor isomer, *t*<sub>R</sub> = 8.79 min for major isomer]; [α]<sub>D</sub><sup>20</sup> = +170.6 (*c* 1.0, MeOH), [α]<sub>D</sub><sup>30</sup> = +146.7 (*c* 1.0, CH<sub>2</sub>Cl<sub>2</sub>) [lit: [α]<sub>D</sub><sup>20</sup> = +228 (*c* 1.0, CH<sub>2</sub>Cl<sub>2</sub>) for (*R*) with 95% ee].

### (+)-*tert*-butyl 2-(benzylthio)propionate (**3c**)

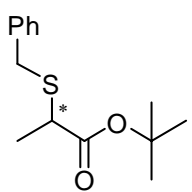 Colorless oil; 62% yield; <sup>1</sup>H NMR (300 MHz, CDCl<sub>3</sub>) δ 7.36–7.22 (m, 5H), 3.88 (d, *J* = 13.2 Hz, 1H), 3.78 (d, *J* = 13.2 Hz, 1H), 3.17 (q, *J* = 7.2 Hz, 1H), 1.56 (s, 9H), 1.33 (d, *J* = 7.2 Hz, 3H); <sup>13</sup>C NMR (75 MHz, CDCl<sub>3</sub>) δ 172.3, 137.8, 129.1, 128.5, 127.1, 81.2, 41.2, 35.9, 28.1, 16.9; HRMS (ESI) Calcd for (C<sub>14</sub>H<sub>20</sub>O<sub>2</sub>S + Na)<sup>+</sup>: 275.1076, Found 275.1073; 83% ee [HPLC condition: Chiralcel OJ-H column, *n*-Hexane/*i*-PrOH = 90:10, flow rate = 1.0 mL/min, wavelength = 210 nm, *t*<sub>R</sub> = 4.75 min for minor isomer, *t*<sub>R</sub> = 5.36 min for major isomer]; [α]<sub>D</sub><sup>20</sup> = +215.8 (*c* 1.0, MeOH).

### (+)-benzyl 2-(4-methoxybenzylthio)propionate (**3d**)

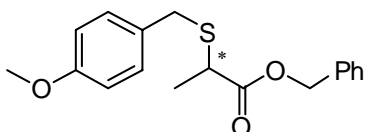 Colorless oil; 73% yield; <sup>1</sup>H NMR (400 MHz, CDCl<sub>3</sub>) δ 7.39–7.33 (m, 5H), 7.16 (d, *J* = 8.4 Hz, 2H), 6.80 (d, *J* = 8.8 Hz, 2H), 5.20 (d, *J* = 12.4 Hz, 1H), 5.13 (d, *J* = 12.4 Hz, 1H),

<sup>3</sup> A. M. Ponce, L. E. Overman, *J. Am. Chem. Soc.* **2000**, *122*, 8672–8676.

3.79–3.67 (m, 5H), 3.32 (q,  $J = 7.2$  Hz, 1H), 1.40 (d,  $J = 7.2$  Hz, 3H);  $^{13}\text{C}$  NMR (100 MHz,  $\text{CDCl}_3$ )  $\delta$  172.9, 158.7, 135.9, 130.2, 129.4, 128.6, 128.4, 128.3, 113.9, 66.8, 55.3, 40.3, 35.3, 16.9; HRMS (ESI) Calcd for  $(\text{C}_{18}\text{H}_{20}\text{O}_3\text{S} + \text{Na})^+$ : 339.1025, Found 339.1022; 85% ee [HPLC condition: Chiralcel OJ-H column, *n*-Hexane/*i*-PrOH = 90:10, flow rate = 1.0 mL/min, wavelength = 220 nm,  $t_{\text{R}} = 34.12$  min for major isomer,  $t_{\text{R}} = 38.73$  min for minor isomer];  $[\alpha]_{\text{D}}^{20} = +167.6$  (*c* 1.0, MeOH).

**(+)-benzyl 2-(4-chlorobenzylthio)propionate (3e)**

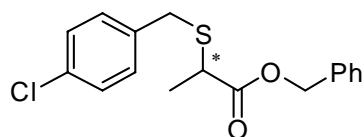

Colorless oil; 86% yield;  $^1\text{H}$  NMR (400 MHz,  $\text{CDCl}_3$ )  $\delta$  7.31–7.26 (m, 5H), 7.17–7.07 (m, 4H), 5.11 (d,  $J = 12.0$  Hz, 1H), 5.04 (d,  $J = 12.0$  Hz, 1H), 3.67 (d,  $J = 13.2$  Hz, 1H), 3.59 (d,  $J = 13.2$  Hz, 1H), 3.21 (q,  $J = 7.2$  Hz, 1H), 1.32 (d,  $J = 7.2$  Hz, 3H);  $^{13}\text{C}$  NMR (100 MHz,  $\text{CDCl}_3$ )  $\delta$  171.6, 135.0, 134.7, 131.9, 129.3, 127.6, 127.4, 127.3, 65.8, 39.2, 34.1, 15.7; HRMS (ESI) Calcd for  $(\text{C}_{17}\text{H}_{17}\text{ClO}_2\text{S} + \text{Na})^+$ : 343.0530, Found 343.0532; 83% ee [HPLC condition: Chiralcel OJ-H column, *n*-Hexane/*i*-PrOH = 90:10, flow rate = 1.0 mL/min, wavelength = 215 nm,  $t_{\text{R}} = 18.68$  min for minor isomer,  $t_{\text{R}} = 20.48$  min for major isomer];  $[\alpha]_{\text{D}}^{20} = +152.5$  (*c* 1.0, MeOH).

**(+)-benzyl 2-(2-methylbenzylthio)propionate (3f)**

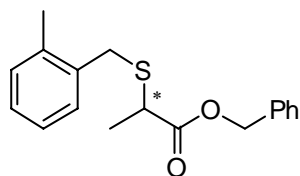

Colorless oil; 87% yield;  $^1\text{H}$  NMR (300 MHz,  $\text{CDCl}_3$ )  $\delta$  7.31–6.98 (m, 9H), 5.13 (d,  $J = 12.3$  Hz, 1H), 5.07 (d,  $J = 12.3$  Hz, 1H), 3.72 (d,  $J = 12.6$  Hz, 1H), 3.67 (d,  $J = 12.6$  Hz, 1H), 3.31 (q,  $J = 7.2$  Hz, 1H), 2.23 (s, 3H), 1.36 (d,  $J = 7.2$  Hz, 3H);  $^{13}\text{C}$  NMR (75 MHz,  $\text{CDCl}_3$ )  $\delta$  172.9, 136.9, 135.8, 135.0, 130.6, 129.9, 128.7, 128.4, 128.3, 127.5, 125.9, 66.9, 40.8, 33.8, 19.1, 17.0; HRMS (ESI) Calcd for  $(\text{C}_{18}\text{H}_{20}\text{O}_2\text{S} + \text{Na})^+$ : 323.1076, Found 323.1080; 68% ee [HPLC condition: Chiralcel OJ-H column, *n*-Hexane/*i*-PrOH = 90:10, flow rate = 1.0 mL/min, wavelength = 210 nm,  $t_{\text{R}} = 13.79$  min for minor isomer,  $t_{\text{R}} = 17.71$  min for major isomer];  $[\alpha]_{\text{D}}^{20} = +121.0$  (*c* 1.0, MeOH).

**(+)-benzyl 2-(2-chlorobenzylthio)propionate (3g)**

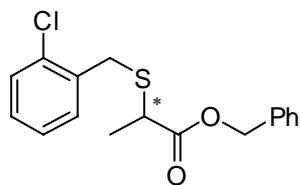

Colorless oil; 70% yield;  $^1\text{H}$  NMR (300 MHz,  $\text{CDCl}_3$ )  $\delta$  7.29–7.07 (m, 9H), 5.11 (d,  $J = 12.3$  Hz, 1H), 5.06 (d,  $J = 12.3$  Hz, 1H), 3.82 (s, 2H), 3.33 (q,  $J = 7.2$  Hz, 1H), 1.36 (d,  $J = 7.2$  Hz, 3H);  $^{13}\text{C}$  NMR (75 MHz,  $\text{CDCl}_3$ )  $\delta$  172.8, 135.7, 135.3, 134.2, 130.9, 129.9, 128.6, 128.4, 128.3, 126.8, 66.9, 40.9, 33.5, 16.9; HRMS (ESI) Calcd for  $(\text{C}_{17}\text{H}_{17}\text{ClO}_2\text{S} + \text{Na})^+$ : 343.0530, Found 343.0524; 78% ee [HPLC condition: Chiralcel OJ-H column, *n*-Hexane/*i*-PrOH = 90:10, flow rate = 1.0 mL/min, wavelength = 220 nm,  $t_{\text{R}} = 10.89$  min for minor isomer,  $t_{\text{R}} = 11.78$  min for major isomer];  $[\alpha]_{\text{D}}^{20} = +144.7$  (*c* 1.0, MeOH).

**(-)-methyl 2-(benzylthio)-2-phenylacetate (3h)**

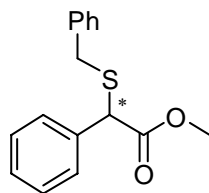

Colorless oil; 59% yield;  $^1\text{H}$  NMR (400 MHz,  $\text{CDCl}_3$ )  $\delta$  7.41–7.25 (m, 10H), 4.42 (s, 1H), 3.78–3.59 (m, 5H);  $^{13}\text{C}$  NMR (100 MHz,  $\text{CDCl}_3$ )  $\delta$  171.2, 137.1, 135.8, 129.1, 128.7, 128.6, 128.2, 127.3, 52.7, 51.5, 36.2; HRMS (ESI) Calcd for  $(\text{C}_{16}\text{H}_{15}\text{O}_2\text{S} + \text{Na})^+$ : 295.0763, Found 295.0766; 44% ee [SFC condition: Chiralcel OD-H column, *sc*  $\text{CO}_2$ /*i*-PrOH = 95:5,  $P_{\text{CO}_2} = 100$  bar, 2.0 mL/min,

oven 40 °C, wavelength = 220 nm,  $t_R$  = 10.56 min for major isomer,  $t_R$  = 12.02 min for minor isomer];  $[\alpha]_D^{20}$  = -56.2 ( $c$  1.0, MeOH).

**(-)-methyl 2-(benzylthio)-2-*o*-tolylacetate (3i)**

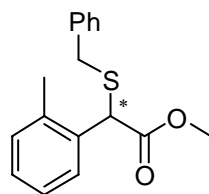

Colorless oil; 64% yield;  $^1\text{H}$  NMR (400 MHz,  $\text{CDCl}_3$ )  $\delta$  7.51 (d,  $J$  = 7.6 Hz, 1H), 7.33–7.10 (m, 8H), 4.58 (s, 1H), 3.83–3.66 (m, 5H), 2.11 (s, 3H);  $^{13}\text{C}$  NMR (100 MHz,  $\text{CDCl}_3$ )  $\delta$  170.5, 136.2, 135.2, 132.8, 129.6, 128.0, 127.5, 127.2, 127.0, 126.2, 125.4, 52.0, 46.4, 35.5, 18.1; HRMS (ESI) Calcd for  $(\text{C}_{17}\text{H}_{18}\text{O}_2\text{S} + \text{Na})^+$ : 309.0920, Found 309.0923; 77% ee [SFC condition: Chiralpak AD-H column,  $\text{sc CO}_2/i\text{-PrOH}$  = 90:10,  $P_{\text{CO}_2}$  = 100 bar, 2.0 mL/min, oven 40 °C, wavelength = 220 nm,  $t_R$  = 5.63 min for minor isomer,  $t_R$  = 6.89 min for major isomer];  $[\alpha]_D^{20}$  = -30.6 ( $c$  1.0, MeOH).

**(-)-methyl 2-(benzylthio)-2-(2-chlorophenyl)acetate (3j)**

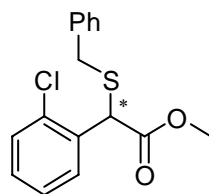

Colorless oil; 83% yield;  $^1\text{H}$  NMR (300 MHz,  $\text{CDCl}_3$ )  $\delta$  7.65–7.62 (m, 1H), 7.35–7.19 (m, 8H), 4.97 (s, 1H), 3.87–3.69 (m, 5H);  $^{13}\text{C}$  NMR (75 MHz,  $\text{CDCl}_3$ )  $\delta$  170.8, 136.9, 133.8, 130.2, 129.6, 129.3, 129.1, 128.6, 127.4, 127.2, 52.9, 47.6, 36.8; HRMS (ESI) Calcd for  $(\text{C}_{16}\text{H}_{15}\text{ClO}_2\text{S} + \text{Na})^+$ : 329.0374, Found 329.0377; 73% ee [HPLC condition: Chiralcel OJ-H column,  $n\text{-Hexane}/i\text{-PrOH}$  = 90:10, flow rate = 1.0 mL/min, wavelength = 220 nm,  $t_R$  = 18.65 min for major isomer,  $t_R$  = 26.86 min for minor isomer];  $[\alpha]_D^{20}$  = -10.4 ( $c$  1.0, MeOH).

**(-)-methyl 2-(benzylthio)-2-(2-methoxyphenyl)acetate (3k)**

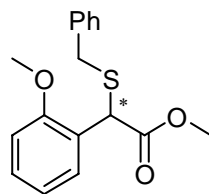

Colorless oil; 88% yield;  $^1\text{H}$  NMR (300 MHz,  $\text{CDCl}_3$ )  $\delta$  7.51–7.48 (m, 1H), 7.31–7.23 (m, 6H), 6.98–6.83 (m, 2H), 4.92 (s, 1H), 3.86–3.68 (m, 8H);  $^{13}\text{C}$  NMR (75 MHz,  $\text{CDCl}_3$ )  $\delta$  170.6, 155.5, 136.3, 128.3, 128.2, 128.1, 127.4, 126.1, 123.4, 119.8, 109.7, 54.6, 51.6, 43.5, 35.5; HRMS (ESI) Calcd for  $(\text{C}_{17}\text{H}_{18}\text{O}_3\text{S} + \text{Na})^+$ : 325.0869, Found 325.0861; 77% ee [SFC condition: Chiralcel OJ-H column,  $\text{sc CO}_2/i\text{-PrOH}$  = 90:10,  $P_{\text{CO}_2}$  = 100 bar, 2.0 mL/min, oven 40 °C, wavelength = 220 nm,  $t_R$  = 8.34 min for major isomer,  $t_R$  = 10.34 min for minor isomer];  $[\alpha]_D^{20}$  = -35.3 ( $c$  1.0, MeOH).

**(-)-methyl 2-(benzylthio)-2-(3-methoxyphenyl)acetate (3l)**

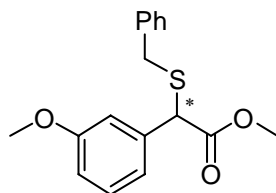

Colorless oil; 71% yield;  $^1\text{H}$  NMR (400 MHz,  $\text{CDCl}_3$ )  $\delta$  7.25–7.14 (m, 6H), 6.90–6.88 (m, 2H), 6.77–6.75 (m, 1H), 4.32 (s, 1H), 3.71–3.52 (m, 8H);  $^{13}\text{C}$  NMR (100 MHz,  $\text{CDCl}_3$ )  $\delta$  170.0, 158.8, 136.2, 136.1, 128.6, 128.0, 127.5, 126.2, 119.9, 112.9, 54.2, 51.7, 50.5, 35.2; HRMS (ESI) Calcd for  $(\text{C}_{17}\text{H}_{18}\text{O}_3\text{S} + \text{Na})^+$ : 325.0869, Found 325.0873; 52% ee [SFC condition: Chiralcel AD-H column,  $\text{sc CO}_2/i\text{-PrOH}$  = 90:10,  $P_{\text{CO}_2}$  = 100 bar, 2.0 mL/min, oven 40 °C, wavelength = 220 nm,  $t_R$  = 7.68 min for minor isomer,  $t_R$  = 8.03 min for major isomer];  $[\alpha]_D^{20}$  = -67.4 ( $c$  1.0, MeOH).

**(-)-methyl 2-(benzylthio)-2-(4-methoxyphenyl)acetate (3m)**

Colorless oil; 61% yield;  $^1\text{H}$  NMR (400 MHz,  $\text{CDCl}_3$ )  $\delta$  7.26–7.16 (m, 7H), 6.78 (d,  $J$  = 8.8 Hz,

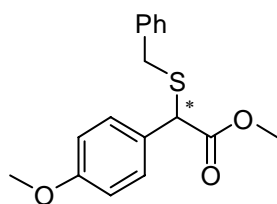

2H), 4.31 (s, 1H), 3.71–3.50 (m, 8H);  $^{13}\text{C}$  NMR (100 MHz,  $\text{CDCl}_3$ )  $\delta$  171.4, 159.5, 137.3, 129.8, 129.1, 128.6, 127.7, 127.3, 114.1, 55.3, 52.7, 50.9, 36.2; HRMS (ESI) Calcd for  $(\text{C}_{17}\text{H}_{18}\text{O}_3\text{S} + \text{Na})^+$ : 325.0869, Found 325.0861; 61% ee [HPLC condition: Chiralcel OJ-H column, *n*-Hexane/*i*-PrOH = 80:20, flow rate = 1.0 mL/min, wavelength = 210 nm,  $t_{\text{R}} = 30.23$  min for major isomer,  $t_{\text{R}} = 43.09$  min for minor isomer];  $[\alpha]_{\text{D}}^{20} = -95.1$  (*c* 1.0, MeOH).

#### (+)-benzyl 2-(phenylthio)propionate (3n)

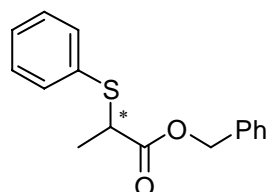

Colorless oil; 90% yield;  $^1\text{H}$  NMR (400 MHz,  $\text{CDCl}_3$ )  $\delta$  7.40–7.23 (m, 10H), 5.11 (d,  $J = 12.4$  Hz, 1H), 5.07 (d,  $J = 12.4$  Hz, 1H), 3.83 (q,  $J = 7.2$  Hz, 1H), 1.49 (d,  $J = 7.2$  Hz, 3H);  $^{13}\text{C}$  NMR (100 MHz,  $\text{CDCl}_3$ )  $\delta$  172.5, 135.5, 133.2, 133.0, 129.0, 128.5, 128.3, 128.1, 66.9, 45.2, 17.4; HRMS (ESI) Calcd for  $(\text{C}_{16}\text{H}_{16}\text{O}_2\text{S} + \text{Na})^+$ : 295.0763, Found 295.0766; 69% ee [SFC condition: Chiralcel OJ-H column, *sc*  $\text{CO}_2$ /*i*-PrOH = 90:10,  $P_{\text{CO}_2} = 100$  bar, 2.0 mL/min, oven 40 °C, wavelength = 210 nm,  $t_{\text{R}} = 6.83$  min for minor isomer,  $t_{\text{R}} = 7.57$  min for major isomer];  $[\alpha]_{\text{D}}^{20} = +85.6$  (*c* 1.0, MeOH).

#### (+)-benzyl 2-(4-methoxyphenylthio)propionate (3o)

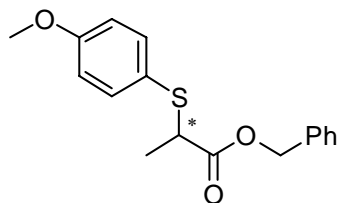

Colorless oil; 83% yield;  $^1\text{H}$  NMR (400 MHz,  $\text{CDCl}_3$ )  $\delta$  7.35–7.29 (m, 7H), 6.80–6.78 (m, 2H), 5.14–5.07 (m, 2H), 3.80 (s, 1H), 3.69 (q,  $J = 5.6$  Hz, 1H), 1.45 (d,  $J = 5.6$  Hz, 3H);  $^{13}\text{C}$  NMR (100 MHz,  $\text{CDCl}_3$ )  $\delta$  172.5, 160.2, 136.6, 135.6, 128.5, 128.3, 128.2, 122.8, 114.5, 66.7, 55.3, 45.9, 17.1; HRMS (ESI) Calcd for  $(\text{C}_{17}\text{H}_{18}\text{O}_3\text{S} + \text{Na})^+$ : 325.0869, Found 325.0867; 72% ee [SFC condition: Chiralcel OJ-H column, *sc*  $\text{CO}_2$ /*i*-PrOH = 90:10,  $P_{\text{CO}_2} = 100$  bar, 2.0 mL/min, oven 40 °C, wavelength = 235 nm,  $t_{\text{R}} = 8.63$  min for minor isomer,  $t_{\text{R}} = 9.42$  min for major isomer];  $[\alpha]_{\text{D}}^{20} = +51.0$  (*c* 1.0, MeOH).

#### (+)-benzyl 2-(4-chlorophenylthio)propionate (3p)

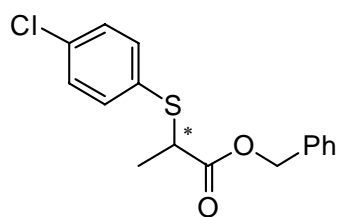

Colorless oil; 80% yield;  $^1\text{H}$  NMR (400 MHz,  $\text{CDCl}_3$ )  $\delta$  7.36–7.19 (m, 9H), 5.13 (d,  $J = 12.0$  Hz, 1H), 5.06 (d,  $J = 12.0$  Hz, 1H), 3.79 (q,  $J = 7.2$ , 1H), 1.49 (d,  $J = 7.2$ , 3H);  $^{13}\text{C}$  NMR (75 MHz,  $\text{CDCl}_3$ )  $\delta$  172.2, 135.4, 134.6, 134.4, 131.4, 129.1, 128.5, 128.3, 67.0, 45.3, 17.2; HRMS (ESI) Calcd for  $(\text{C}_{16}\text{H}_{15}\text{ClO}_2\text{S} + \text{Na})^+$ : 329.0374, Found 329.0380; 62% ee [SFC condition: Chiralcel OJ-H column, *sc*  $\text{CO}_2$ /*i*-PrOH = 90:10,  $P_{\text{CO}_2} = 100$  bar, 2.0 mL/min, oven 40 °C, wavelength = 220 nm,  $t_{\text{R}} = 6.54$  min for minor isomer,  $t_{\text{R}} = 7.17$  min for major isomer];  $[\alpha]_{\text{D}}^{20} = +74.3$  (*c* 1.0, MeOH).

#### (+)-benzyl 2-(3-methoxyphenylthio)propionate (3q)

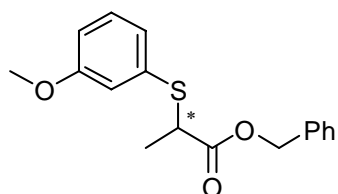

Colorless oil; 76% yield;  $^1\text{H}$  NMR (400 MHz,  $\text{CDCl}_3$ )  $\delta$  7.36–7.25 (m, 5H), 7.18–7.14 (m, 1H), 6.98–6.96 (m, 2H), 6.79 (d,  $J = 9.2$  Hz, 1H), 5.12 (d,  $J = 12.4$  Hz, 1H), 5.08 (d,  $J = 12.4$  Hz, 1H), 3.86 (q,  $J = 7.2$  Hz, 1H), 3.72 (s, 3H), 1.50 (d,  $J = 7.2$  Hz, 3H);  $^{13}\text{C}$

NMR (100 MHz, CDCl<sub>3</sub>) δ 171.5, 158.6, 134.5, 133.4, 128.7, 127.5, 127.2, 127.1, 123.8, 116.6, 112.9, 65.9, 54.2, 44.1, 16.4; HRMS (ESI) Calcd for (C<sub>17</sub>H<sub>18</sub>O<sub>3</sub>S + Na)<sup>+</sup>: 325.0869, Found 325.0874; 62% ee [HPLC condition: Chiralcel OJ-H column, *n*-Hexane/*i*-PrOH = 90:10, flow rate = 1.0 mL/min, wavelength = 220 nm, *t*<sub>R</sub> = 18.02 min for major isomer, *t*<sub>R</sub> = 20.07 min for minor isomer]; [α]<sub>D</sub><sup>20</sup> = +75.0 (*c* 1.0, MeOH).

**(+)-benzyl 2-(3-chlorophenylthio)propionate (3r)**

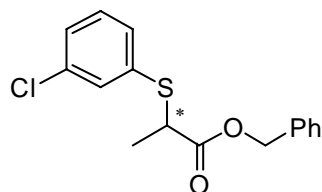

Colorless oil; 85% yield; <sup>1</sup>H NMR (400 MHz, CDCl<sub>3</sub>) δ 7.32–7.06 (m, 9H), 5.05 (d, *J* = 12.0 Hz, 1H), 5.00 (d, *J* = 12.0 Hz, 1H), 3.77 (q, *J* = 7.2 Hz, 1H), 1.36 (d, *J* = 6.8 Hz, 3H); <sup>13</sup>C NMR (100 MHz, CDCl<sub>3</sub>) δ 171.1, 134.3, 134.2, 133.5, 131.1, 129.5, 128.9, 127.5, 127.3, 127.2, 127.0, 66.0, 43.9, 16.2; HRMS (ESI) Calcd for (C<sub>16</sub>H<sub>15</sub>ClO<sub>2</sub>S + Na)<sup>+</sup>: 329.0374, Found 329.0371; 60% ee [HPLC condition: Chiralcel OJ-H column, *n*-Hexane/*i*-PrOH = 90:10, flow rate = 1.0 mL/min, wavelength = 220 nm, *t*<sub>R</sub> = 9.72 min for major isomer, *t*<sub>R</sub> = 10.80 min for minor isomer]; [α]<sub>D</sub><sup>20</sup> = +58.2 (*c* 1.0, MeOH).

**(+)-benzyl 2-(2-methoxyphenylthio)propionate (3s)**

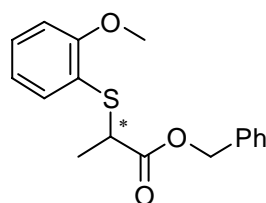

Colorless oil; 76% yield; <sup>1</sup>H NMR (400 MHz, CDCl<sub>3</sub>) δ 7.29–7.12 (m, 7H), 6.78–6.75 (m, 2H), 4.98 (d, *J* = 12.4 Hz, 1H), 4.94 (d, *J* = 12.4 Hz, 1H), 3.92 (q, *J* = 7.2 Hz, 1H), 3.75 (s, 3H), 1.42 (d, *J* = 7.2 Hz, 3H); <sup>13</sup>C NMR (100 MHz, CDCl<sub>3</sub>) δ 171.7, 158.1, 134.6, 133.7, 128.8, 127.4, 127.1, 120.0, 119.8, 109.8, 65.7, 54.7, 42.1, 16.0; HRMS (ESI) Calcd for (C<sub>17</sub>H<sub>18</sub>O<sub>3</sub>S + Na)<sup>+</sup>: 325.0869, Found 325.0863; 60% ee [HPLC condition: Chiralcel OD-H column, *n*-Hexane/*i*-PrOH = 90:10, flow rate = 1.0 mL/min, wavelength = 286 nm, *t*<sub>R</sub> = 9.05 min for major isomer, *t*<sub>R</sub> = 10.36 min for minor isomer]; [α]<sub>D</sub><sup>20</sup> = +126.5 (*c* 1.0, MeOH).

**(+)-benzyl 2-(2-chlorophenylthio)propionate (3t)**

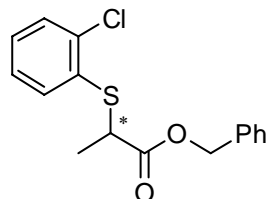

Colorless oil; 92% yield; <sup>1</sup>H NMR (400 MHz, CDCl<sub>3</sub>) δ 7.33–7.01 (m, 9H), 5.00 (s, 2H), 3.88 (q, *J* = 7.2 Hz, 1H), 1.47 (d, *J* = 7.2 Hz, 3H); <sup>13</sup>C NMR (100 MHz, CDCl<sub>3</sub>) δ 171.1, 135.6, 134.4, 132.8, 131.7, 128.9, 127.9, 127.4, 127.2, 126.1, 66.0, 42.9, 16.0; HRMS (ESI) Calcd for (C<sub>16</sub>H<sub>15</sub>ClO<sub>2</sub>S + Na)<sup>+</sup>: 329.0374, Found 329.0376; 60% ee [HPLC condition: Chiralcel OJ-H column, *n*-Hexane/*i*-PrOH = 85:15, flow rate = 1.0 mL/min, wavelength = 230 nm, *t*<sub>R</sub> = 10.65 min for minor isomer, *t*<sub>R</sub> = 12.30 min for major isomer]; [α]<sub>D</sub><sup>20</sup> = +77.4 (*c* 1.0, MeOH).

**(+)-benzyl 2-(2,6-dichlorophenylthio)propionate (3u)**

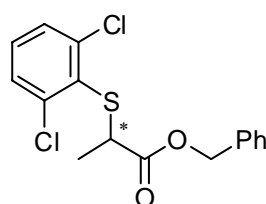

Colorless oil; 81% yield; <sup>1</sup>H NMR (400 MHz, CDCl<sub>3</sub>) δ 7.33–7.11 (m, 8H), 5.10 (d, *J* = 12.4 Hz, 1H), 5.00 (d, *J* = 12.4 Hz, 1H), 3.92 (q, *J* = 7.2 Hz, 1H), 1.54 (d, *J* = 7.2 Hz, 3H); <sup>13</sup>C NMR (100 MHz, CDCl<sub>3</sub>) δ 171.9, 141.8, 135.3, 131.4, 130.6, 128.6, 128.4, 128.2, 128.1, 67.2, 44.2, 16.4; HRMS (ESI) Calcd for (C<sub>16</sub>H<sub>14</sub>Cl<sub>2</sub>O<sub>2</sub>S + Na)<sup>+</sup>: 362.9984, Found 362.9978; 67% ee [HPLC condition: Chiralcel OJ-H column,

*n*-Hexane/*i*-PrOH = 95:5, flow rate = 1.0 mL/min, wavelength = 210 nm,  $t_R$  = 15.26 min for minor isomer,  $t_R$  = 19.85 min for major isomer];  $[\alpha]_D^{20}$  = +97.5 (*c* 1.0, MeOH).

**(+)-benzyl 2-(butylthio)propionate (3v)**

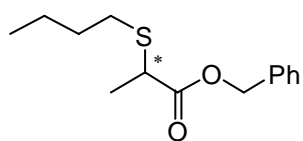

Colorless oil; 86% yield;  $^1\text{H}$  NMR (400 MHz,  $\text{CDCl}_3$ )  $\delta$  7.38–7.32 (m, 5H), 5.21 (d,  $J$  = 12.4 Hz, 1H), 5.15 (d,  $J$  = 12.4 Hz, 1H), 3.44 (q,  $J$  = 7.2 Hz, 1H), 2.63–2.51 (m, 2H), 1.56–1.26 (m, 7H), 0.87 (t,  $J$  = 7.2 Hz, 3H);  $^{13}\text{C}$  NMR (100 MHz,  $\text{CDCl}_3$ )  $\delta$  172.1, 134.8, 127.5, 127.2, 127.1, 65.7, 40.0, 30.3, 30.0, 20.9, 16.2, 12.6; HRMS (ESI) Calcd for  $(\text{C}_{14}\text{H}_{20}\text{O}_2\text{S} + \text{Na})^+$ : 275.1076, Found 275.1076; 17% ee [The ee value was determined by converting the title product into the corresponding amide as the following procedure: the product was dissolved in ethanol and treated with aq. NaOH (1.25 M) under 0 °C for *ca.* 2 hours. After an acidic workup the crude acid was obtained and was reacted with aniline (1.1 eq) in the presences of DMAP (6 mol%) and DCC (1.1 eq) in THF for 30 min. The reaction mixture was filtered through celite. The filtrate was diluted with  $\text{Et}_2\text{O}$ , washed with 3 N HCl, saturated  $\text{NaHCO}_3$  and dried with  $\text{Na}_2\text{SO}_4$ . The desired amide was obtained after a flash chromatography on  $\text{Al}_2\text{O}_3$  column. HPLC condition for the corresponding amide: Chiralcel OD-H column, *n*-Hexane/*i*-PrOH = 95:5, flow rate = 1.0 mL/min, wavelength = 230 nm,  $t_R$  = 11.69 min for major isomer,  $t_R$  = 12.68 min for minor isomer];  $[\alpha]_D^{20}$  = +48.4 (*c* 1.0, MeOH).

**(+)-benzyl 2-(isobutylthio)propionate (3w)**

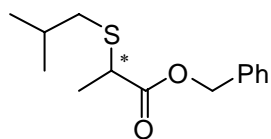

Colorless oil; 84% yield;  $^1\text{H}$  NMR (300 MHz,  $\text{CDCl}_3$ )  $\delta$  7.36–7.34 (m, 5H), 5.21 (d,  $J$  = 12.3 Hz, 1H), 5.13 (d,  $J$  = 12.3 Hz, 1H), 3.41 (q,  $J$  = 7.2 Hz, 1H), 2.52–2.38 (m, 2H), 1.81–1.67 (m, 1H), 1.45 (d,  $J$  = 7.2 Hz, 3H), 0.94–0.91 (m, 6H);  $^{13}\text{C}$  NMR (75 MHz,  $\text{CDCl}_3$ )  $\delta$  172.1, 134.8, 127.5, 127.2, 65.7, 40.3, 39.1, 27.3, 21.0, 20.8, 16.2; HRMS (ESI) Calcd for  $(\text{C}_{14}\text{H}_{20}\text{O}_2\text{S} + \text{Na})^+$ : 275.1076, Found 275.1077; 32% ee [The ee value was determined by converting the title product into the corresponding amide as the procedure described above. SFC condition for the corresponding amide: Chiralpak AD-H column, *sc*  $\text{CO}_2$ /*i*-PrOH = 85:15,  $P_{\text{CO}_2}$  = 100 bar, 2.0 mL/min, oven 40 °C, wavelength = 254 nm,  $t_R$  = 4.28 min for major isomer,  $t_R$  = 4.91 min for minor isomer];  $[\alpha]_D^{20}$  = +56.7 (*c* 1.0, MeOH).

**(+)-benzyl 2-(isopropylthio)propionate (3x)**

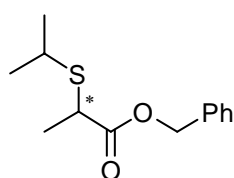

Colorless oil; 85% yield;  $^1\text{H}$  NMR (400 MHz,  $\text{CDCl}_3$ )  $\delta$  7.37–7.32 (m, 5H), 5.20 (d,  $J$  = 12.4 Hz, 1H), 5.15 (d,  $J$  = 12.4 Hz, 1H), 3.51 (q,  $J$  = 7.2 Hz, 1H), 3.06–2.99 (m, 1H), 1.45 (d,  $J$  = 6.8 Hz, 3H), 1.27 (d,  $J$  = 6.8 Hz, 3H), 1.19 (d,  $J$  = 6.8 Hz, 3H);  $^{13}\text{C}$  NMR (100 MHz,  $\text{CDCl}_3$ )  $\delta$  172.4, 134.8, 127.5, 127.2, 127.1, 65.7, 39.3, 34.4, 22.5, 22.1, 16.5; HRMS (ESI) Calcd for  $(\text{C}_{13}\text{H}_{18}\text{O}_2\text{S} + \text{Na})^+$ : 261.0920, Found 261.0920; 61% ee [HPLC condition : Chiralcel OJ-H column, *n*-Hexane/*i*-PrOH = 99:1, flow rate = 1.0 mL/min, wavelength = 210 nm,  $t_R$  = 10.94 min for major isomer,  $t_R$  = 13.51 min for minor isomer];  $[\alpha]_D^{20}$  = +55.7 (*c* 1.0, MeOH).

**(+)-benzyl 2-(tritylthio)propionate (3y)**

Viscous oil; 57% yield;  $^1\text{H}$  NMR (400 MHz,  $\text{CDCl}_3$ )  $\delta$  7.44–7.42 (m, 6H), 7.34–7.33 (m, 3H),

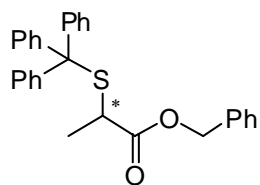

7.25–7.16 (m, 11H), 4.98 (d,  $J = 12.4$  Hz, 1H), 4.84 (d,  $J = 12.4$  Hz, 1H), 2.99 (q,  $J = 7.2$  Hz, 1H), 1.16 (d,  $J = 7.2$  Hz, 3H);  $^{13}\text{C}$  NMR (100 MHz,  $\text{CDCl}_3$ )  $\delta$  172.4, 143.2, 134.5, 128.6, 127.4, 127.2, 126.9, 125.7, 67.1, 65.8, 41.3, 17.6; HRMS (ESI) Calcd for  $(\text{C}_{29}\text{H}_{26}\text{O}_2\text{S} + \text{Na})^+$ : 461.1546, Found 461.1540; 77% ee [SFC condition: Chiralcel OJ-H column, sc  $\text{CO}_2/i\text{-PrOH} = 80:20$ ,  $P_{\text{CO}_2} = 100$  bar, 2.0 mL/min, oven 40 °C, wavelength = 220 nm,  $t_{\text{R}} = 7.07$  min for major isomer,  $t_{\text{R}} = 12.61$  min for minor isomer];  $[\alpha]_{\text{D}}^{20} = +136.7$  ( $c$  1.0, MeOH).

### 3. Preparation of (+)-benzyl 2-mercaptopropionate (**5**)<sup>4</sup>

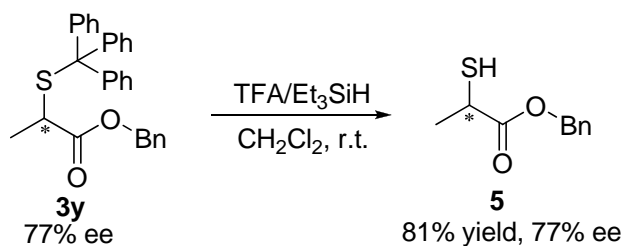

Benzyl 2-(tritylthio)propionate (**3y**) was dissolved in methylene chloride, trifluoroacetic acid and  $\text{Et}_3\text{SiH}$  (1.0 equiv.) were added subsequently. After stirring for 1 h at room temperature (TLC monitoring), the reaction mixture was concentrated and chromatographed on  $\text{SiO}_2$  to give benzyl 2-mercaptopropionate (**5**) as a colorless oil in 81% yield.  $^1\text{H}$  NMR (400 MHz,  $\text{CDCl}_3$ )  $\delta$  7.38–7.34 (m, 5H), 5.19 (d,  $J = 12.4$  Hz, 1H), 5.15 (d,  $J = 12.4$  Hz, 1H), 3.58–3.51 (m, 1H), 2.17 (d,  $J = 8.4$  Hz, 1H), 1.54 (d,  $J = 7.2$  Hz, 3H);  $^{13}\text{C}$  NMR (100 MHz,  $\text{CDCl}_3$ )  $\delta$  173.5, 135.5, 128.6, 128.4, 128.2, 67.1, 35.7, 21.1. The ee value of **5** was determined by converting the title product into benzyl 2-(benzoylthio)propionate. 77% ee [SFC condition for benzyl 2-(benzoylthio)propionate: Chiralcel OJ-H column, sc  $\text{CO}_2/i\text{-PrOH} = 90:10$ ,  $P_{\text{CO}_2} = 100$  bar, 2.0 mL/min, oven 40 °C, wavelength = 254 nm,  $t_{\text{R}} = 11.03$  min for minor isomer,  $t_{\text{R}} = 11.81$  min for major isomer];  $[\alpha]_{\text{D}}^{30} = +16.2$  ( $c$  1.0, MeOH).

<sup>4</sup> Y. Tanabe, H. Yamamoto, M. Murakami, K. Yanagi, Y. Kubota, H. Okumura, Y. Sanemitsu, G. Suzukamo, *J. Chem. Soc., Perkin Trans. 1* **1995**, 935.

## 4. NMR Spectra of New S-H Insertion Products

### Benzyl 2-(benzylthio)propionate (3a)

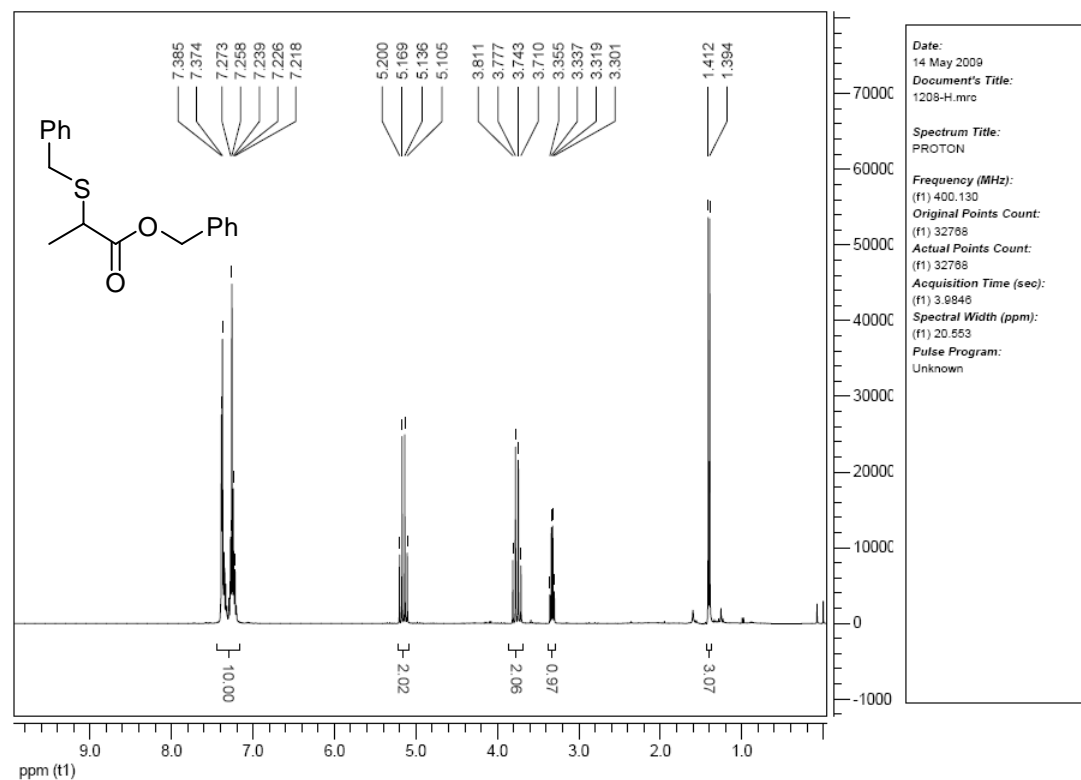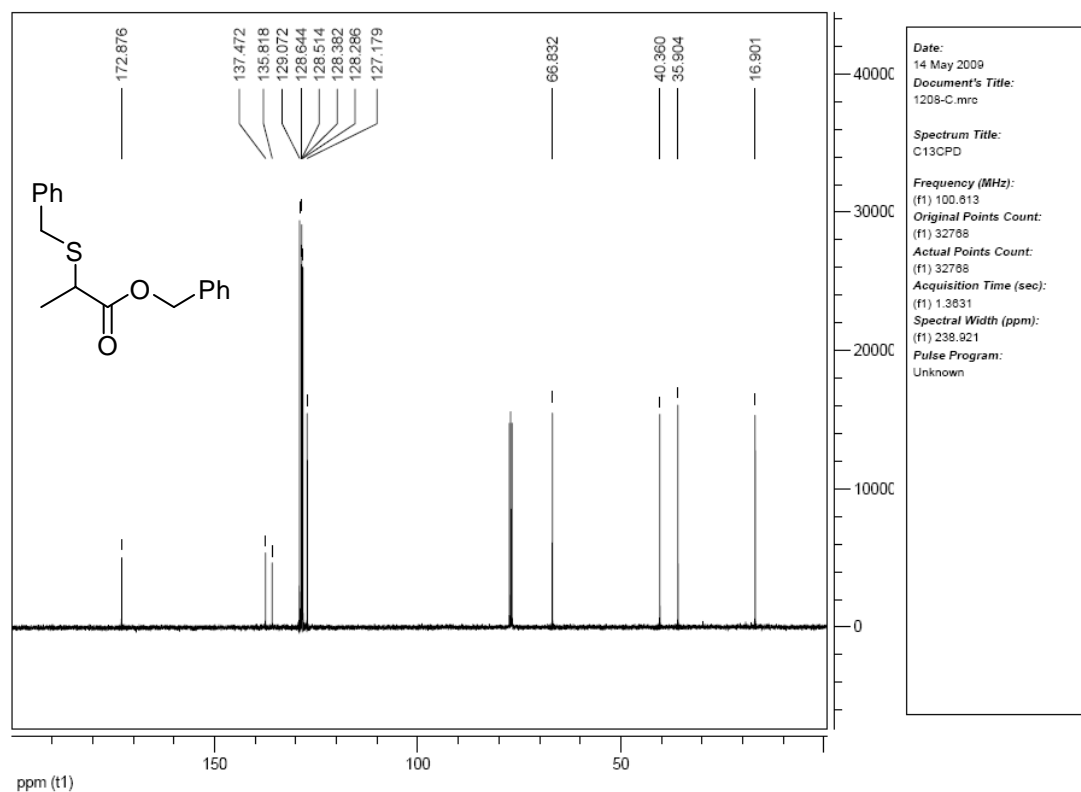

***tert*-Butyl 2-(benzylthio)propionate (3c)**

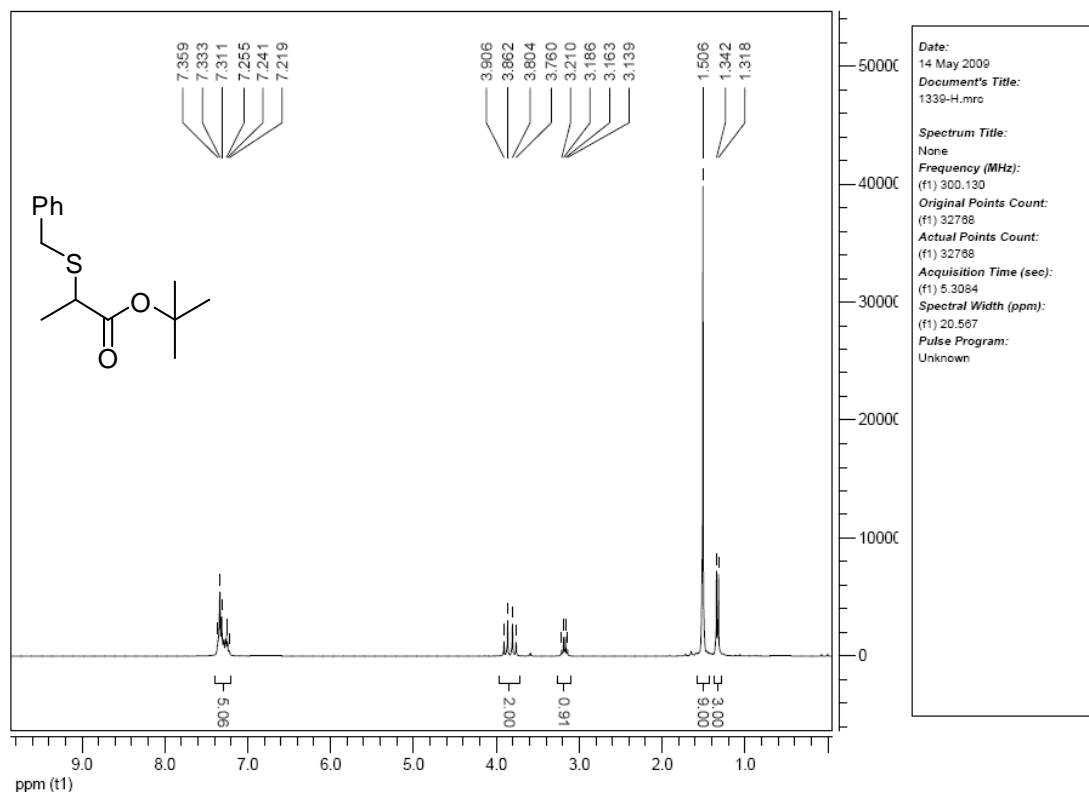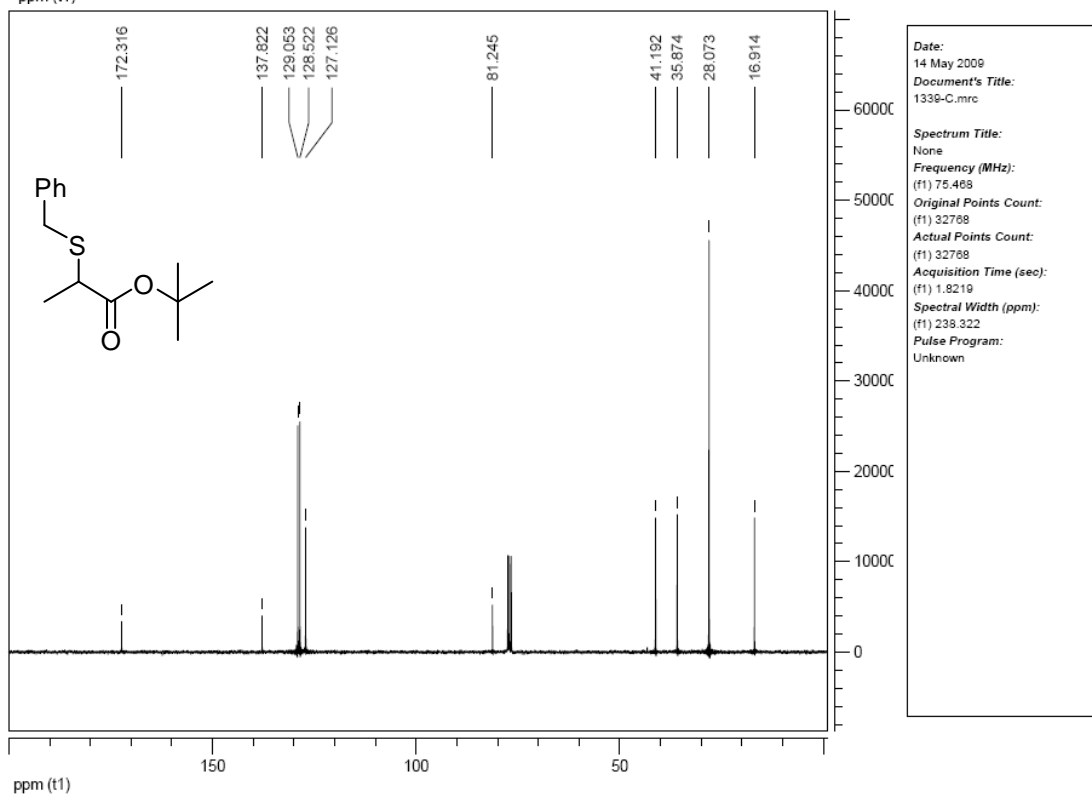

### Benzyl 2-(4-methoxybenzylthio)propionate (3d)

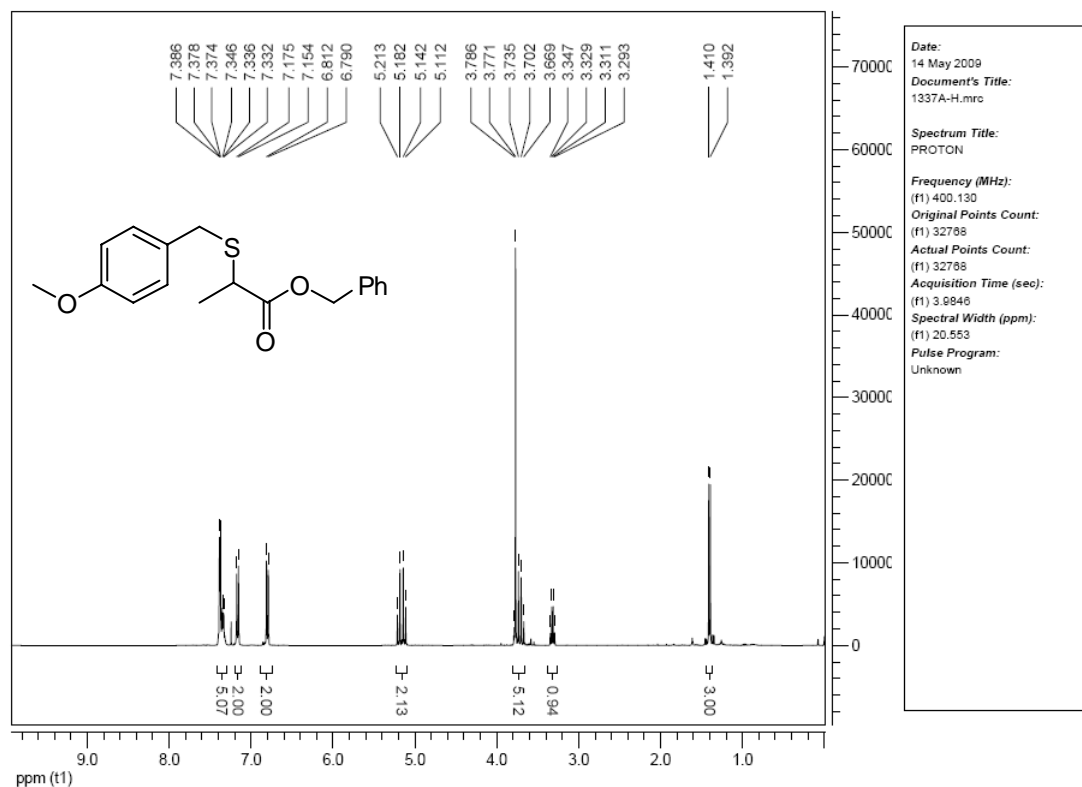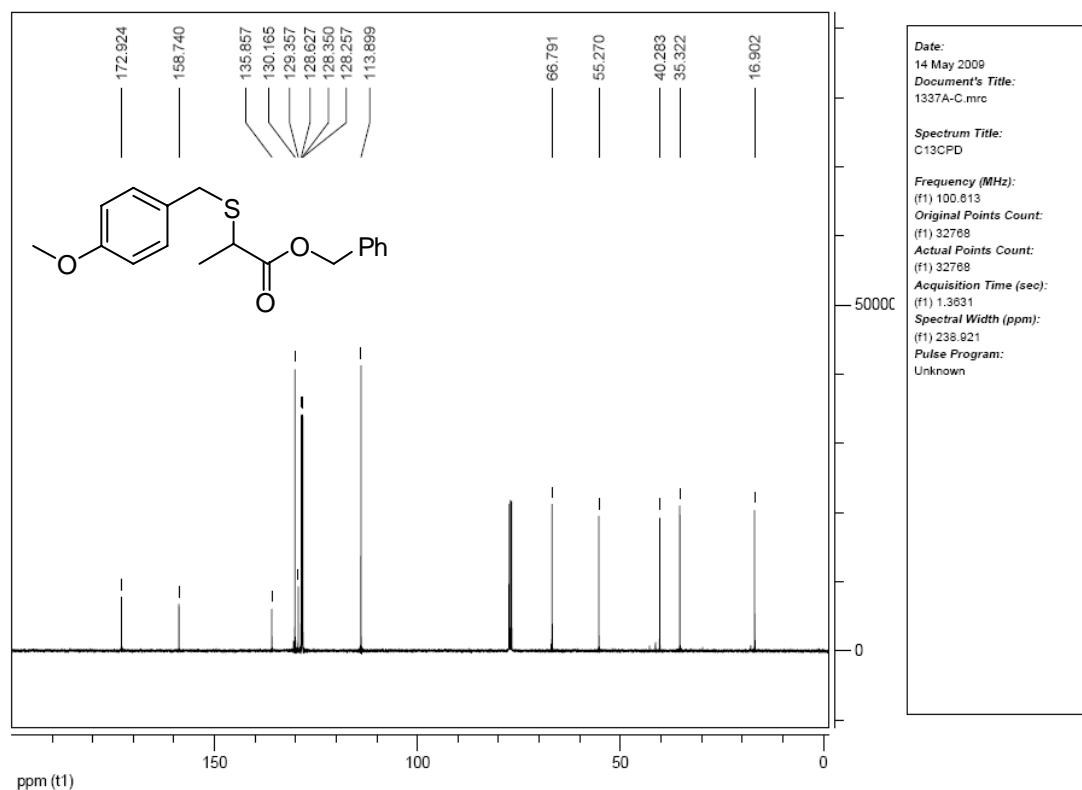

### Benzyl 2-(4-chlorobenzylthio)propionate (3e)

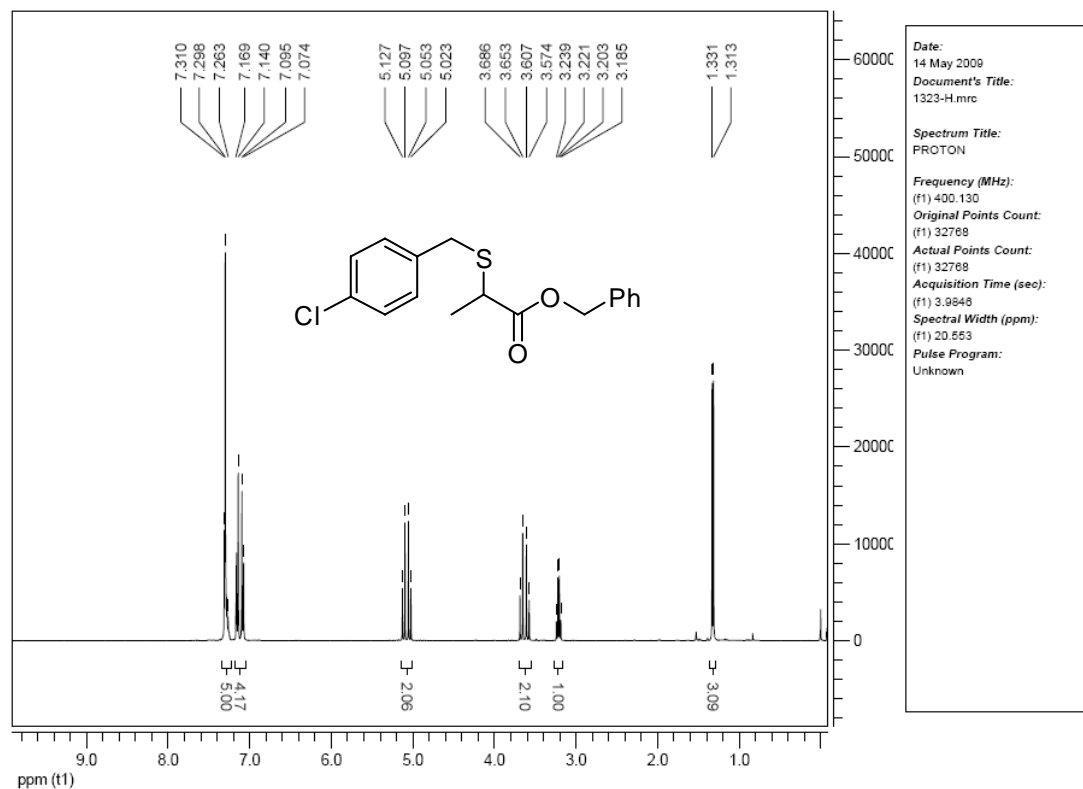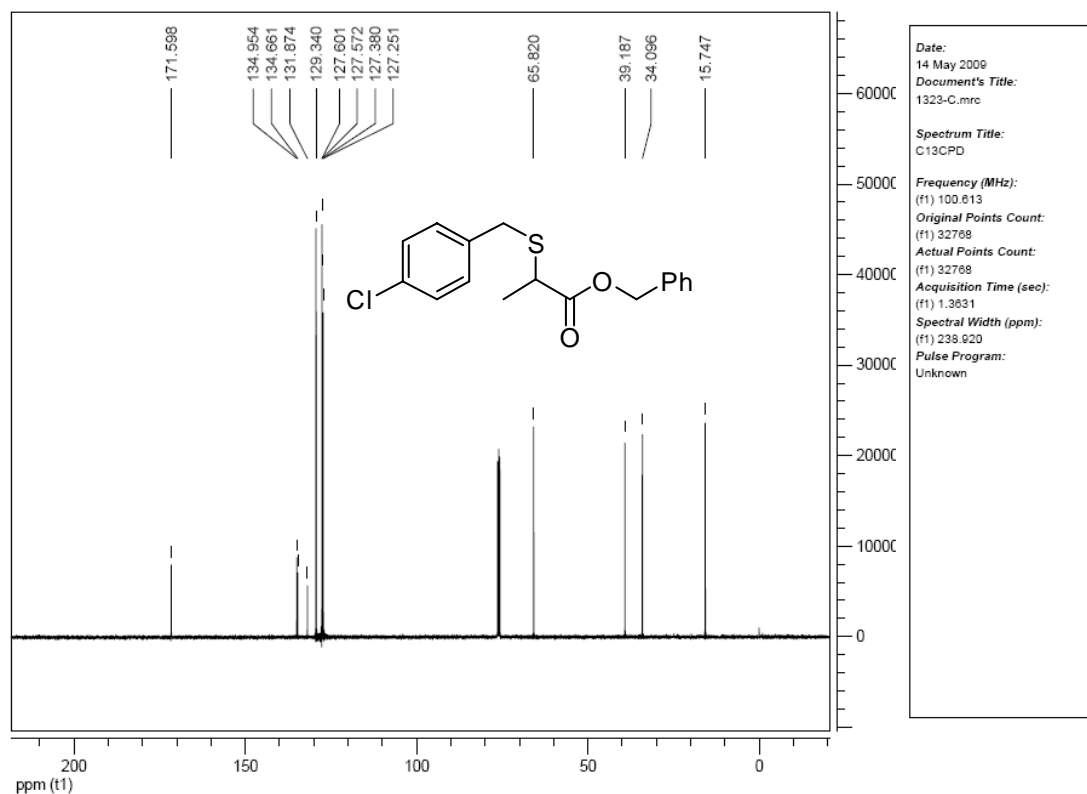

### Benzyl 2-(2-methylbenzylthio)propionate (3f)

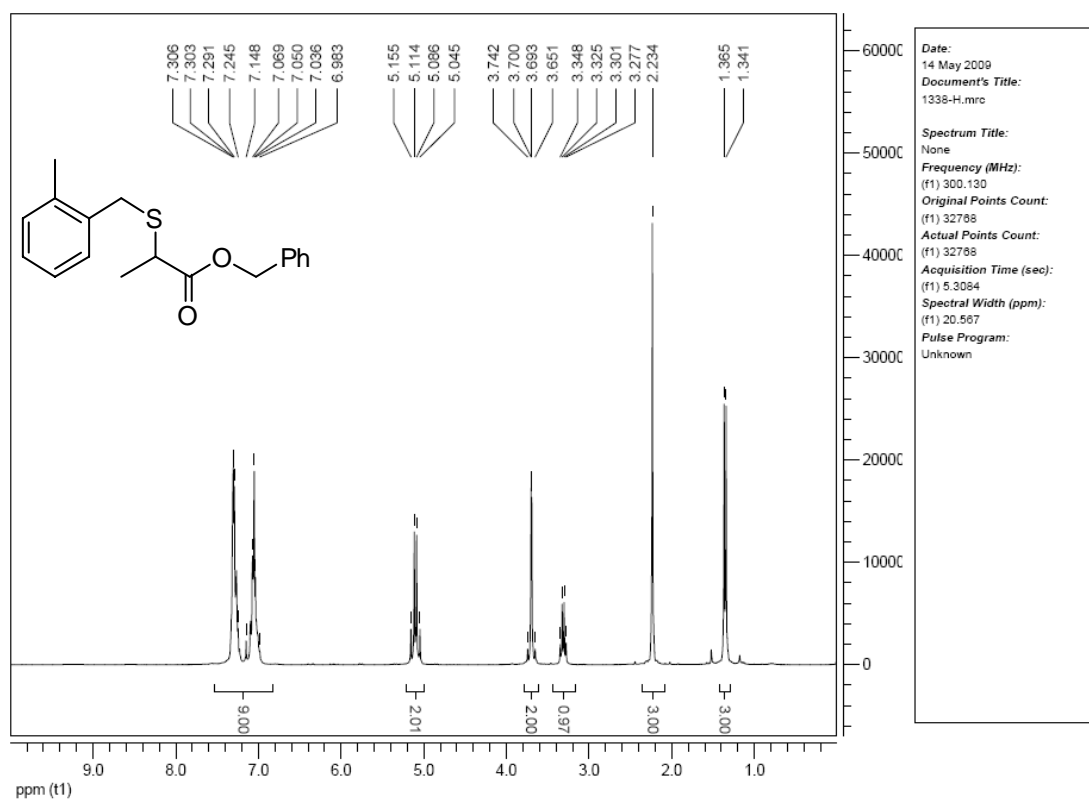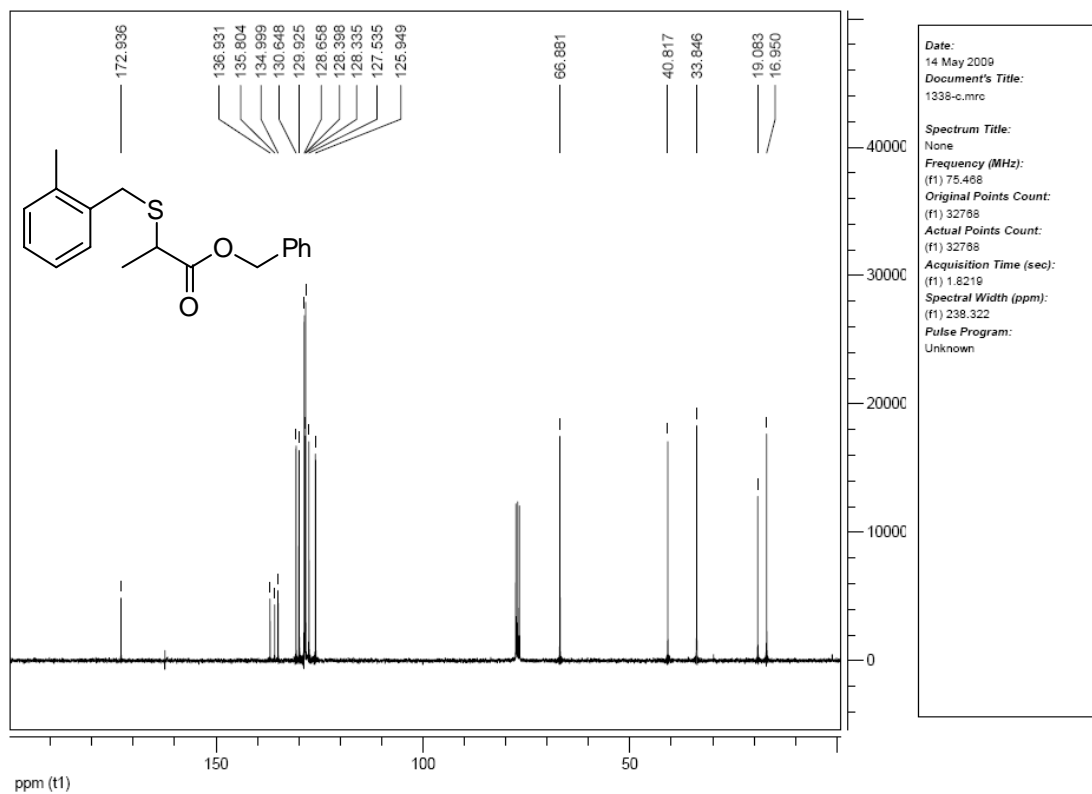

### Benzyl 2-(2-chlorobenzylthio)propionate (3g)

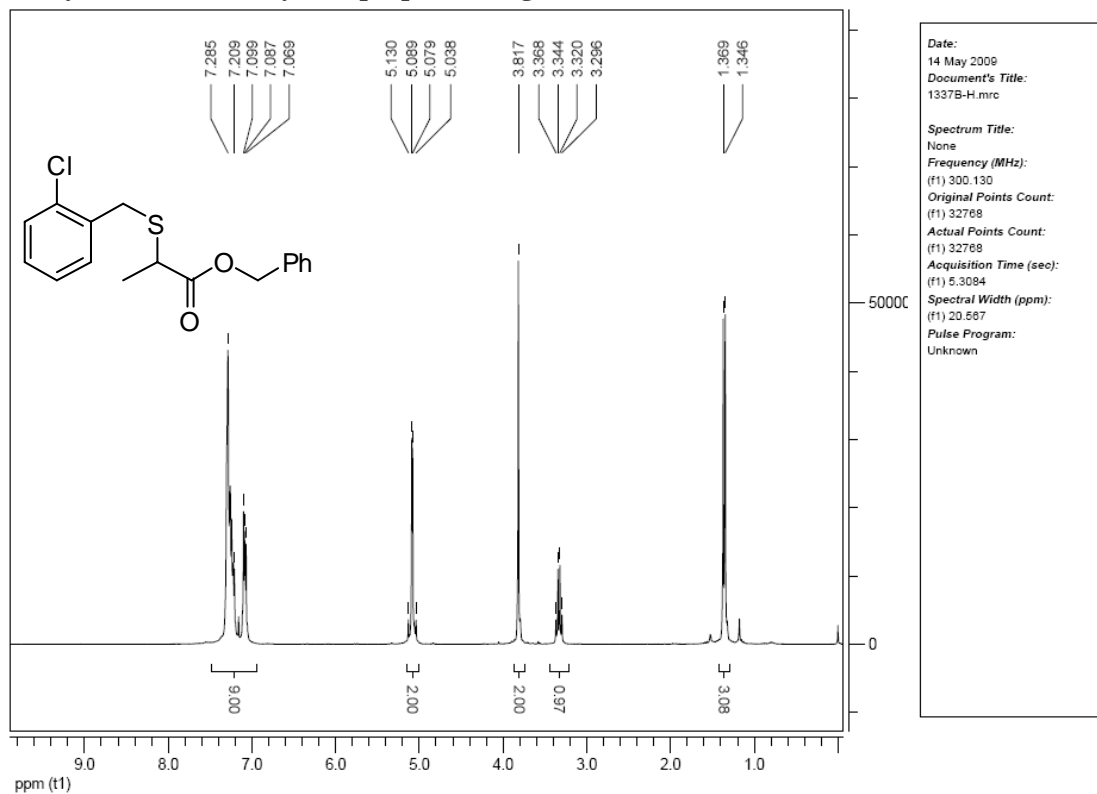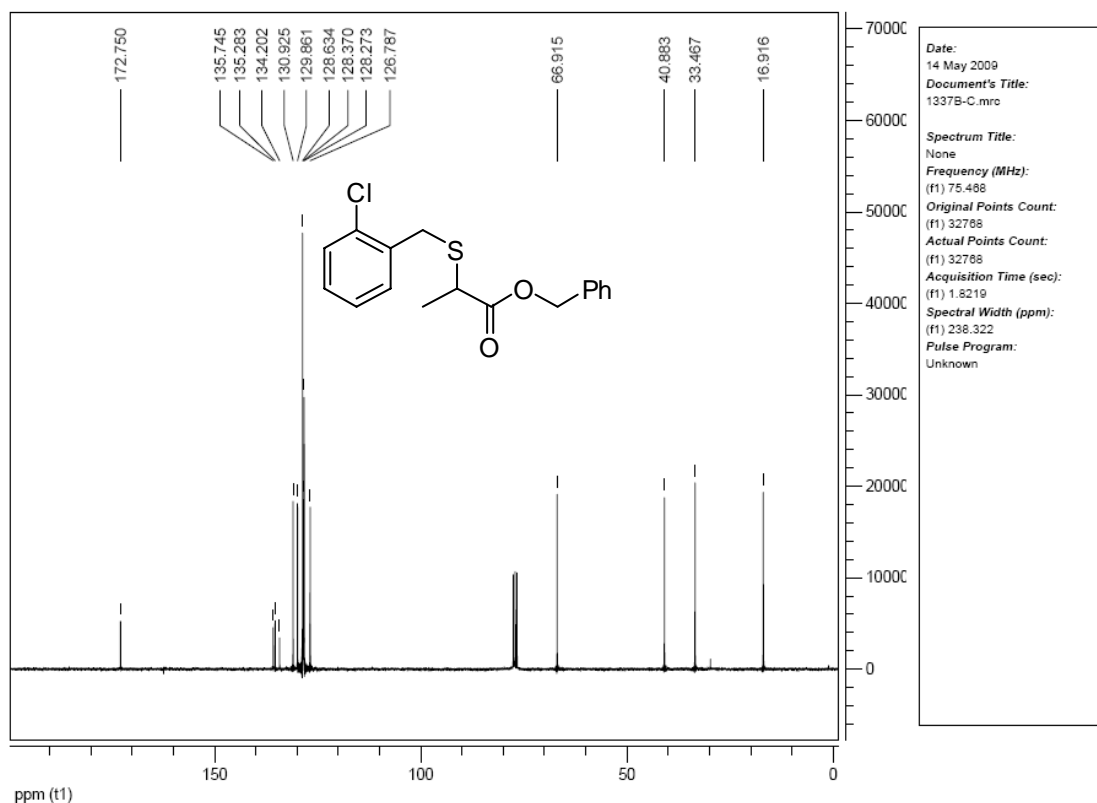

### Methyl 2-(benzylthio)-2-phenylacetate (3h)

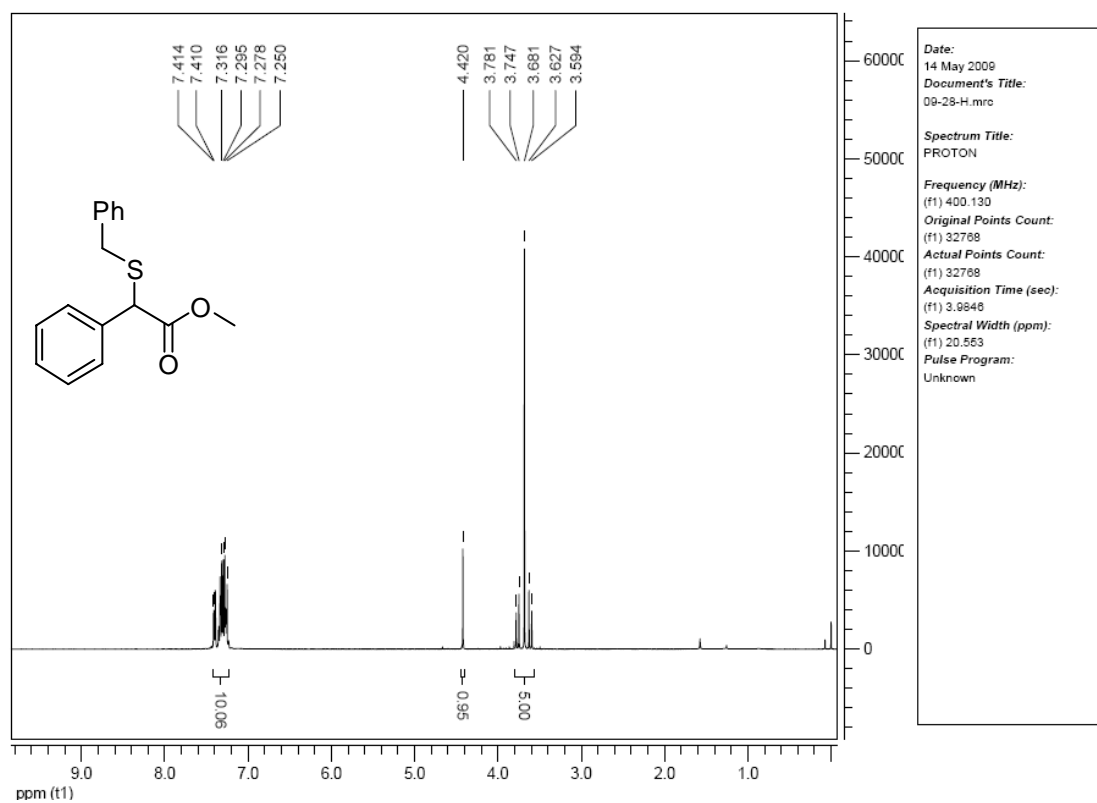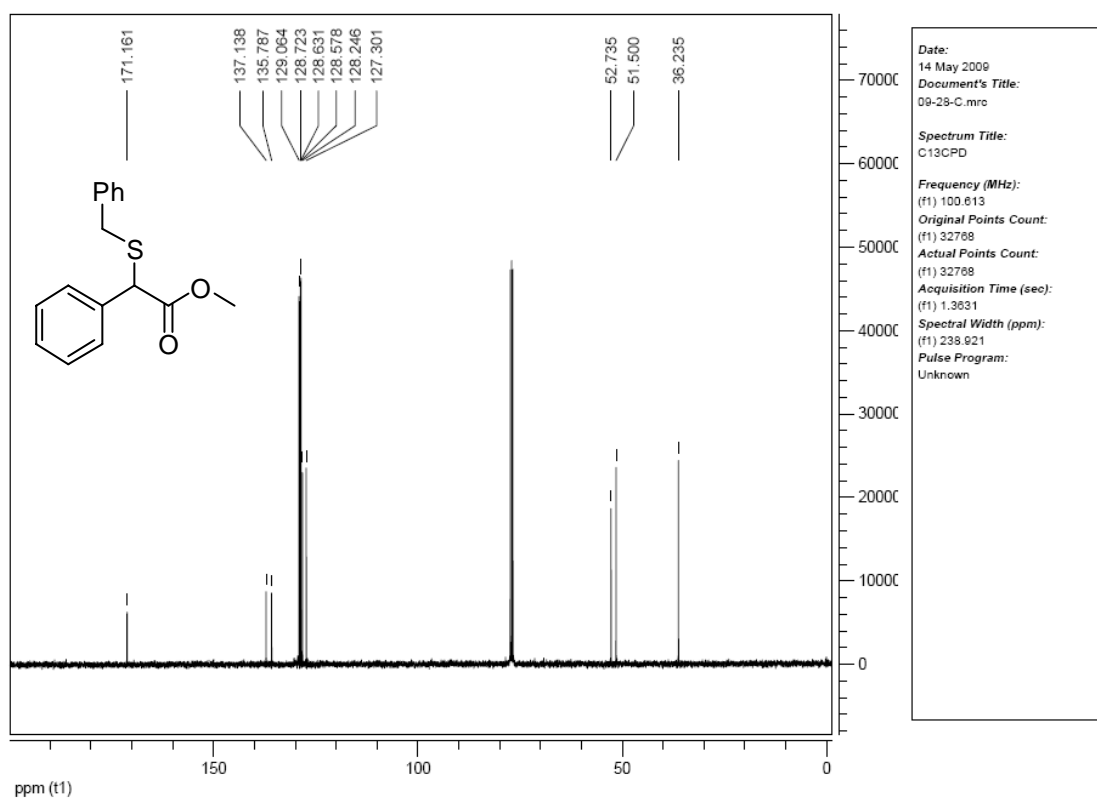

### Methyl 2-(benzylthio)-2-o-tolylacetate (3i)

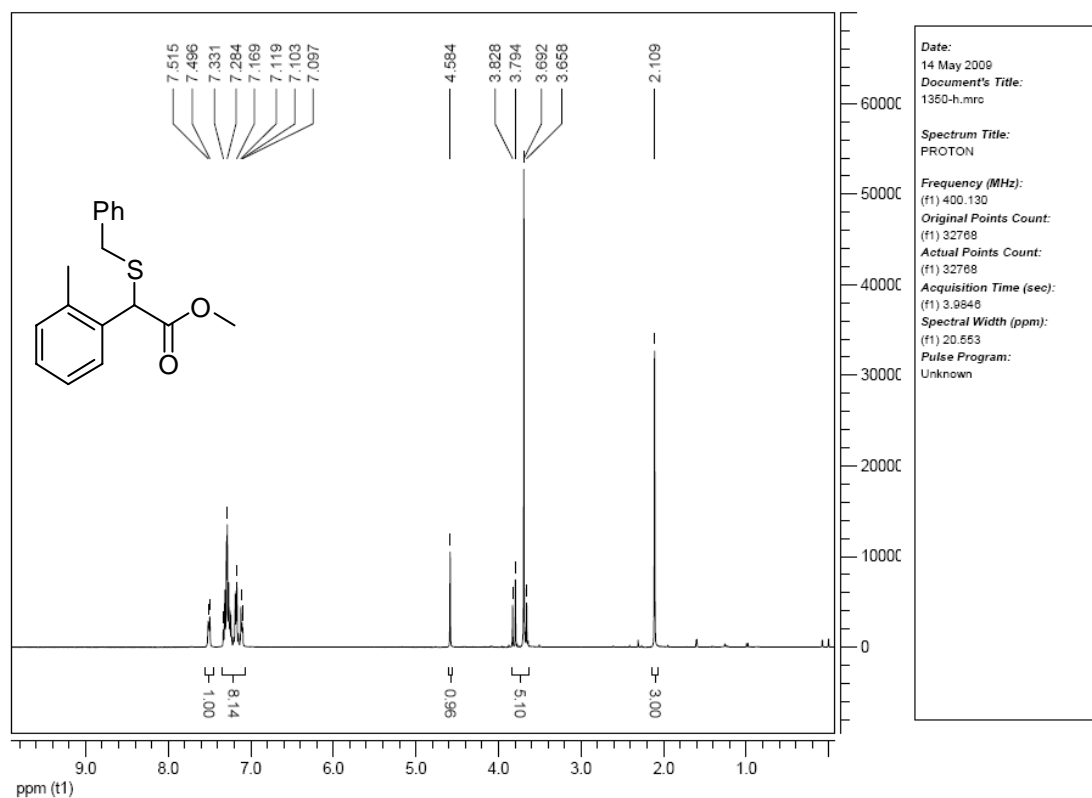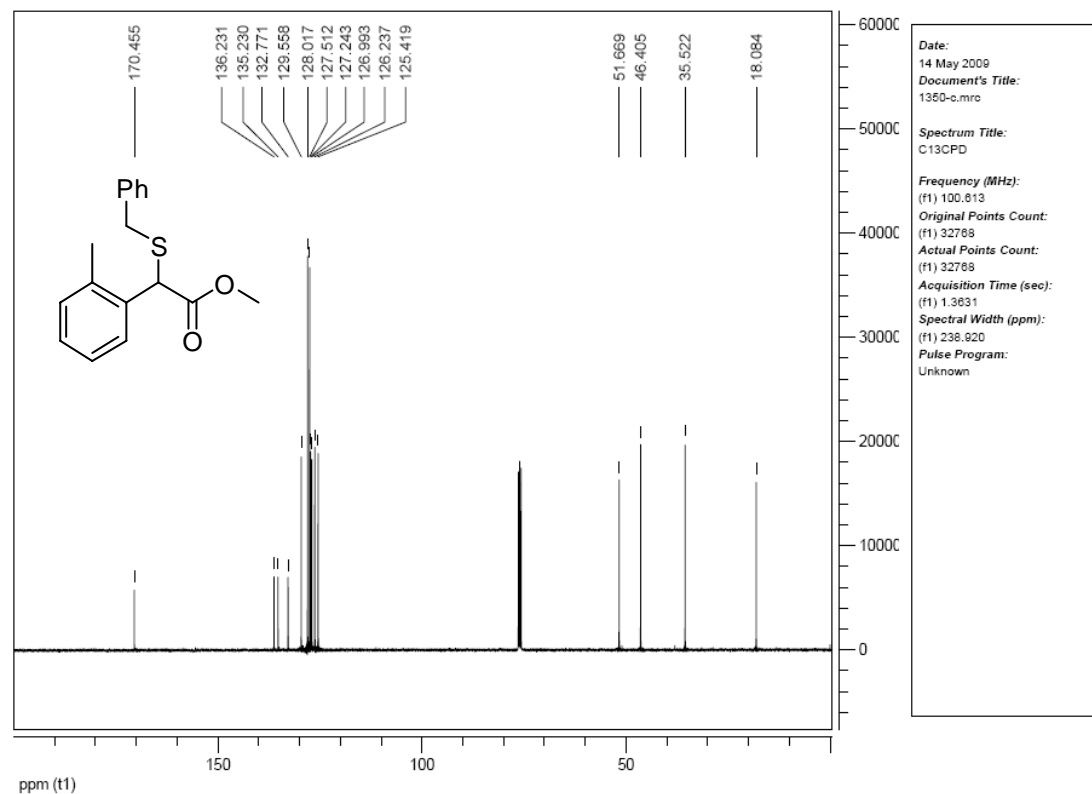

### Methyl 2-(benzylthio)-2-(2-chlorophenyl)acetate (3j)

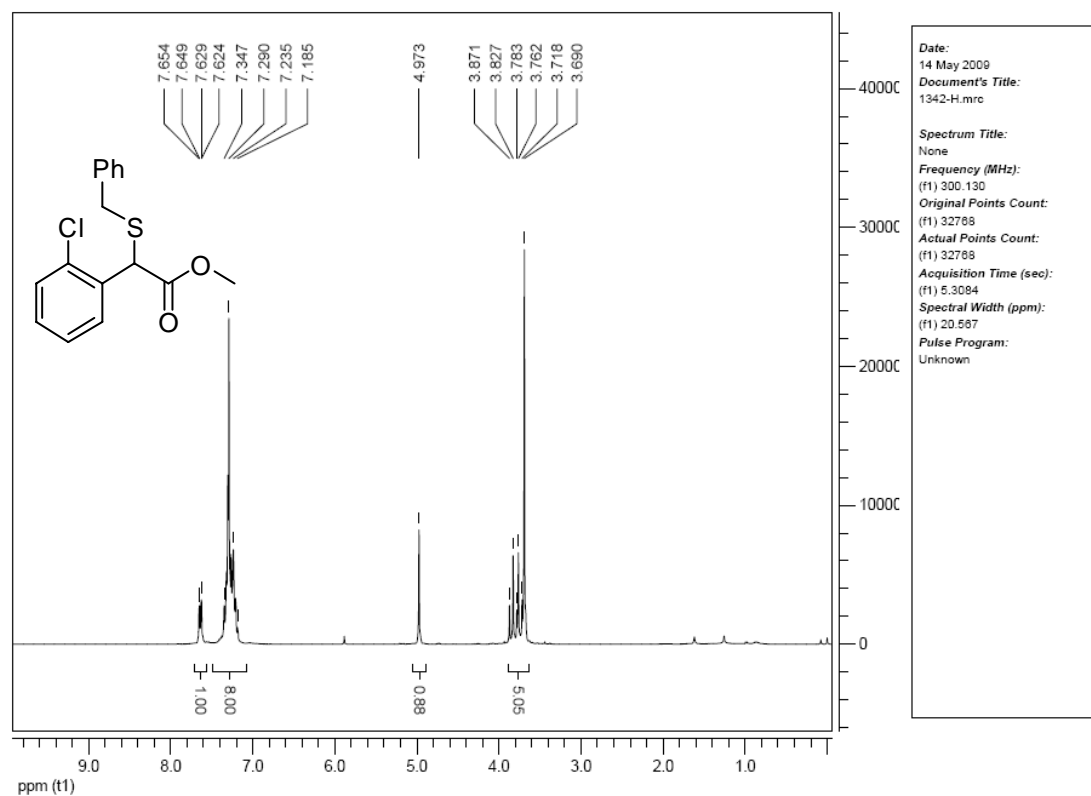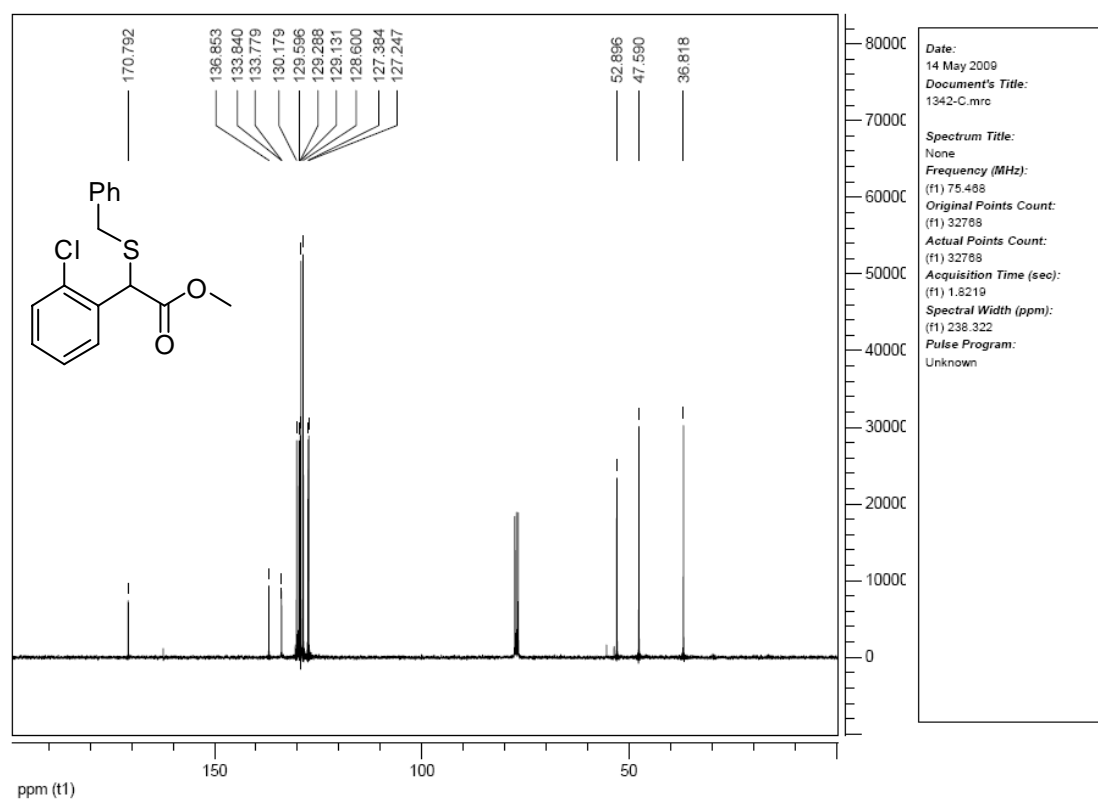

### Methyl 2-(benzylthio)-2-(2-methoxyphenyl)acetate (3k)

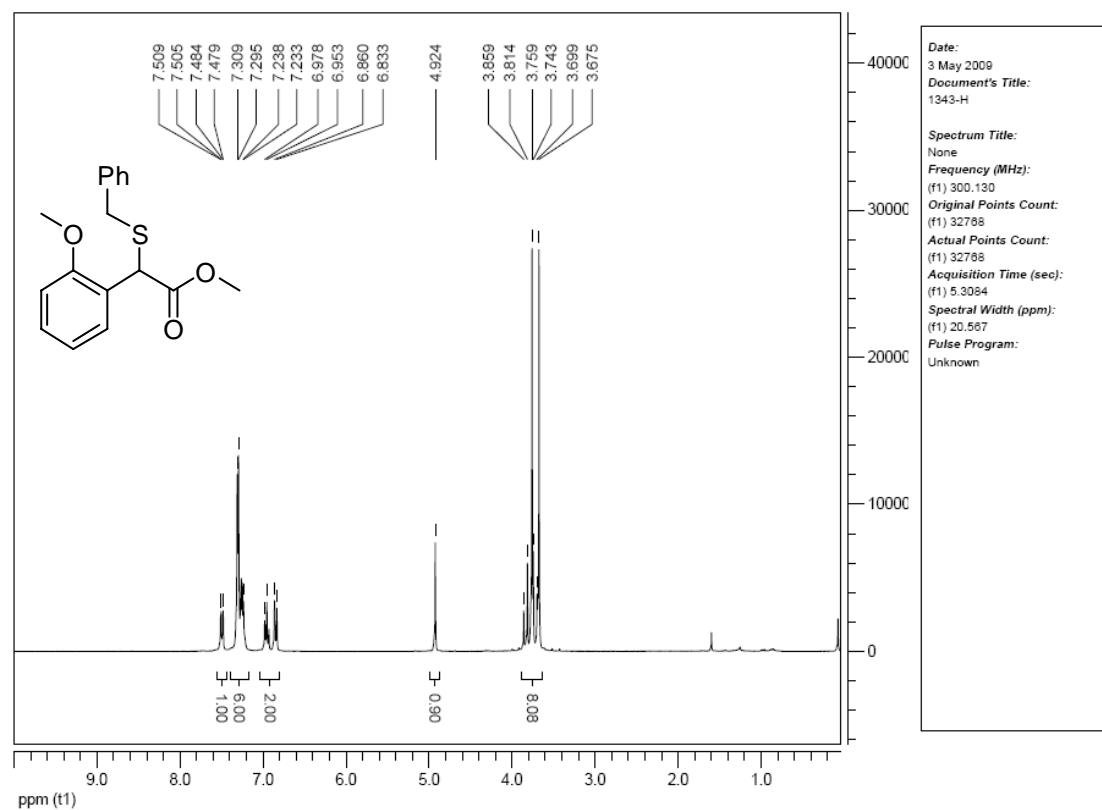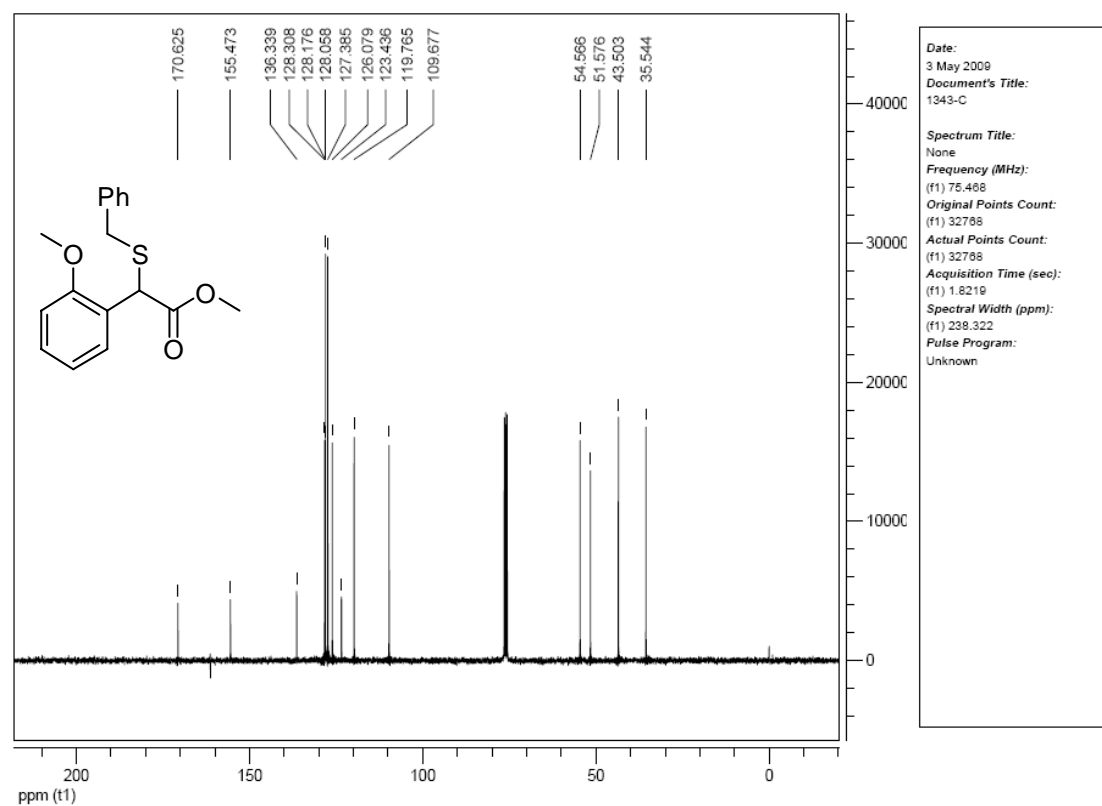

### Methyl 2-(benzylthio)-2-(3-methoxyphenyl)acetate (3I)

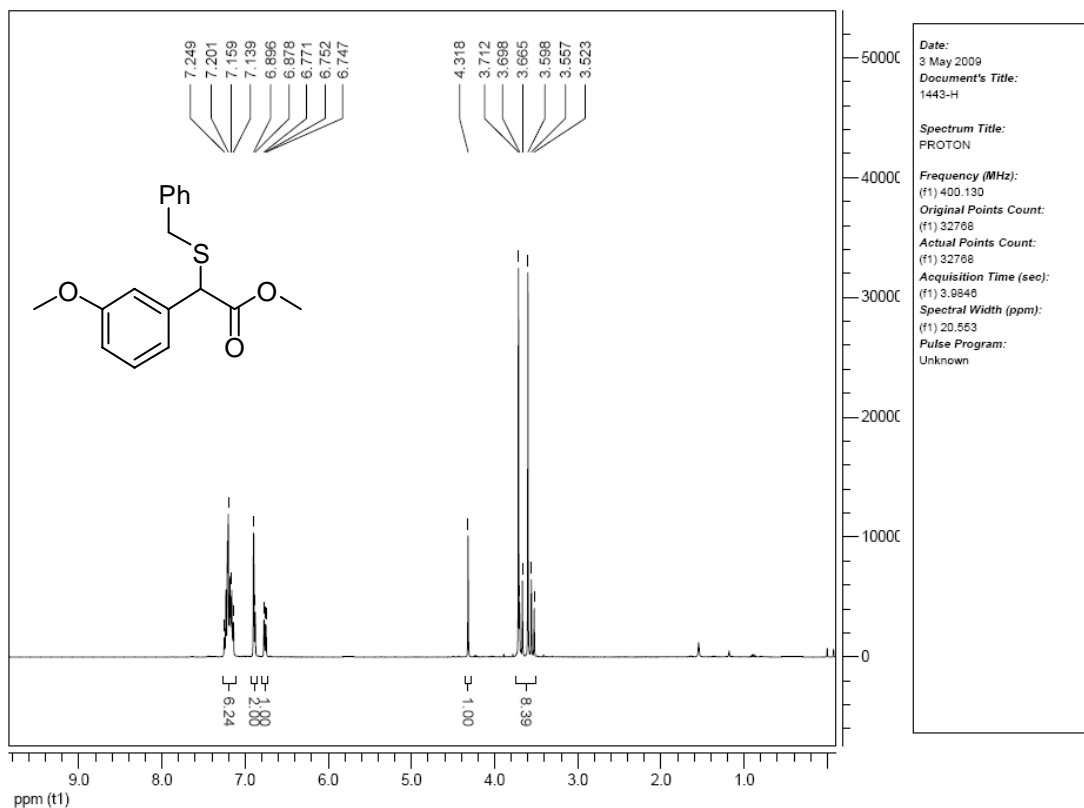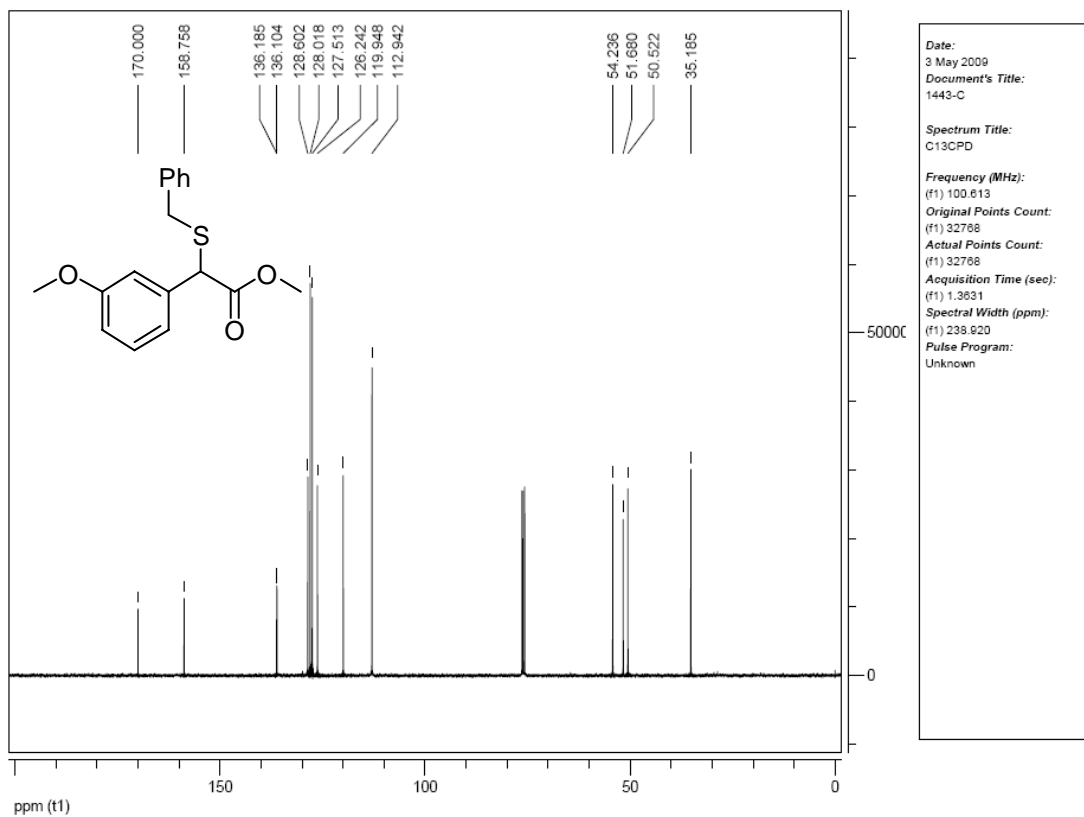

### Methyl 2-(benzylthio)-2-(4-methoxyphenyl)acetate (3m)

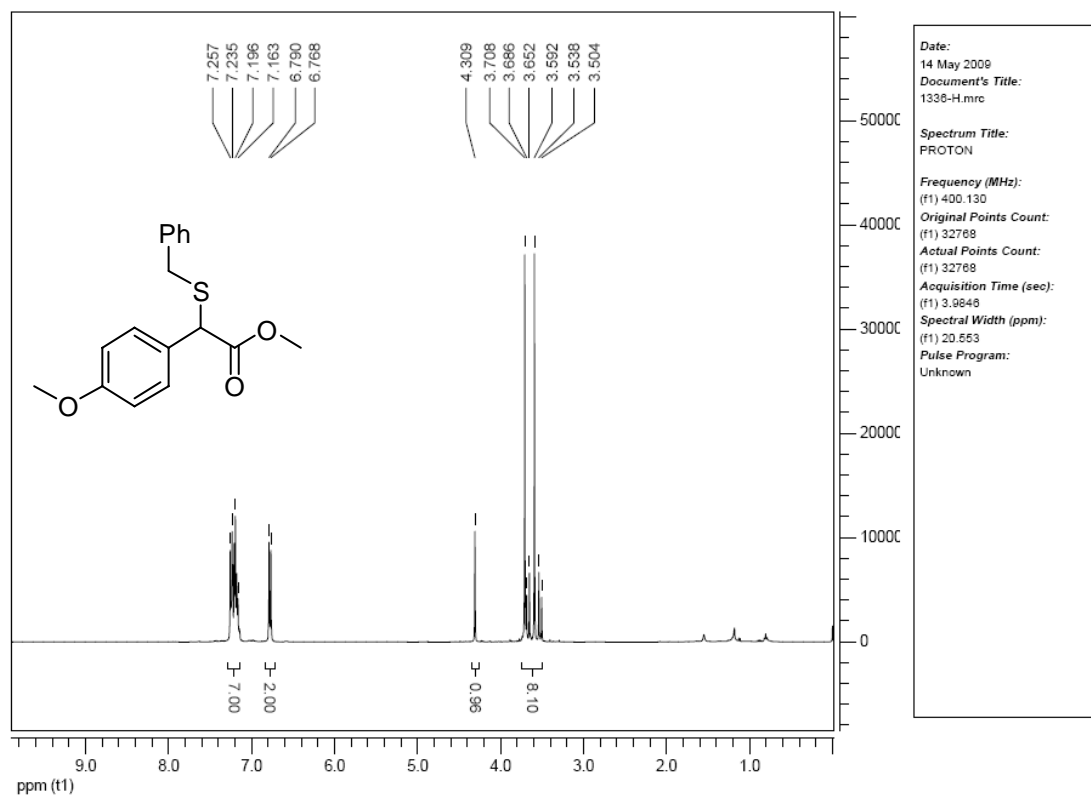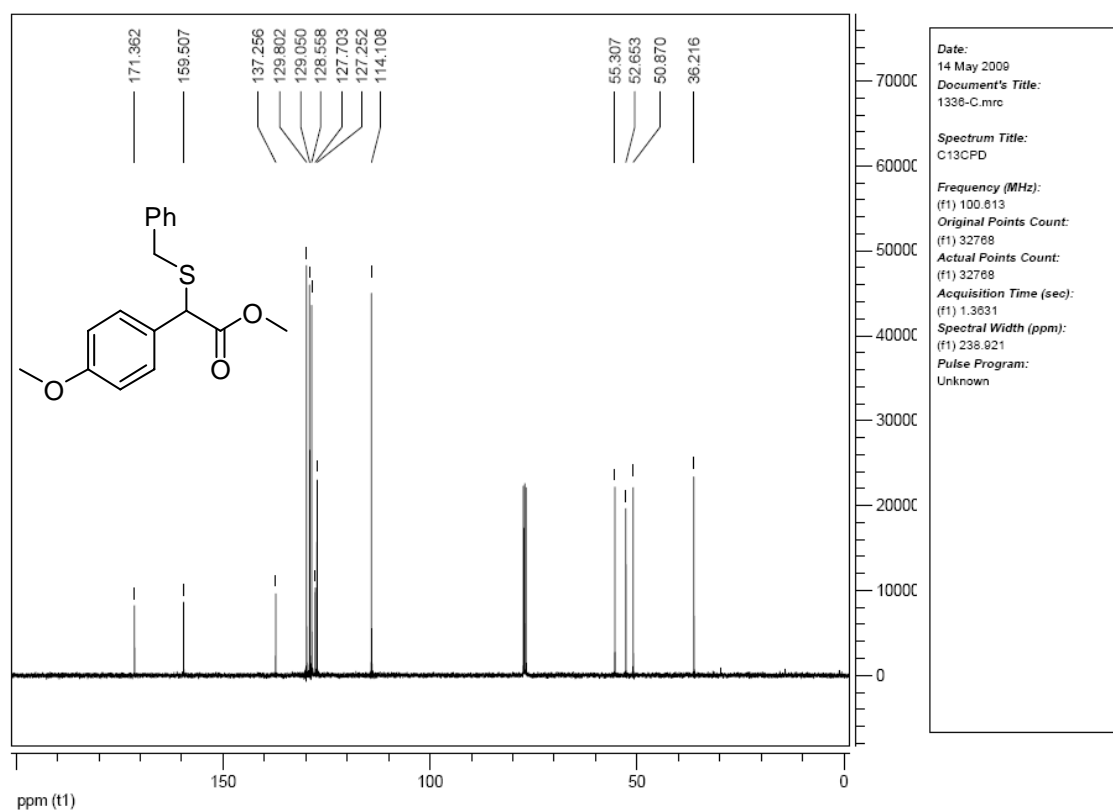

### Benzyl 2-(phenylthio)propionate (3n)

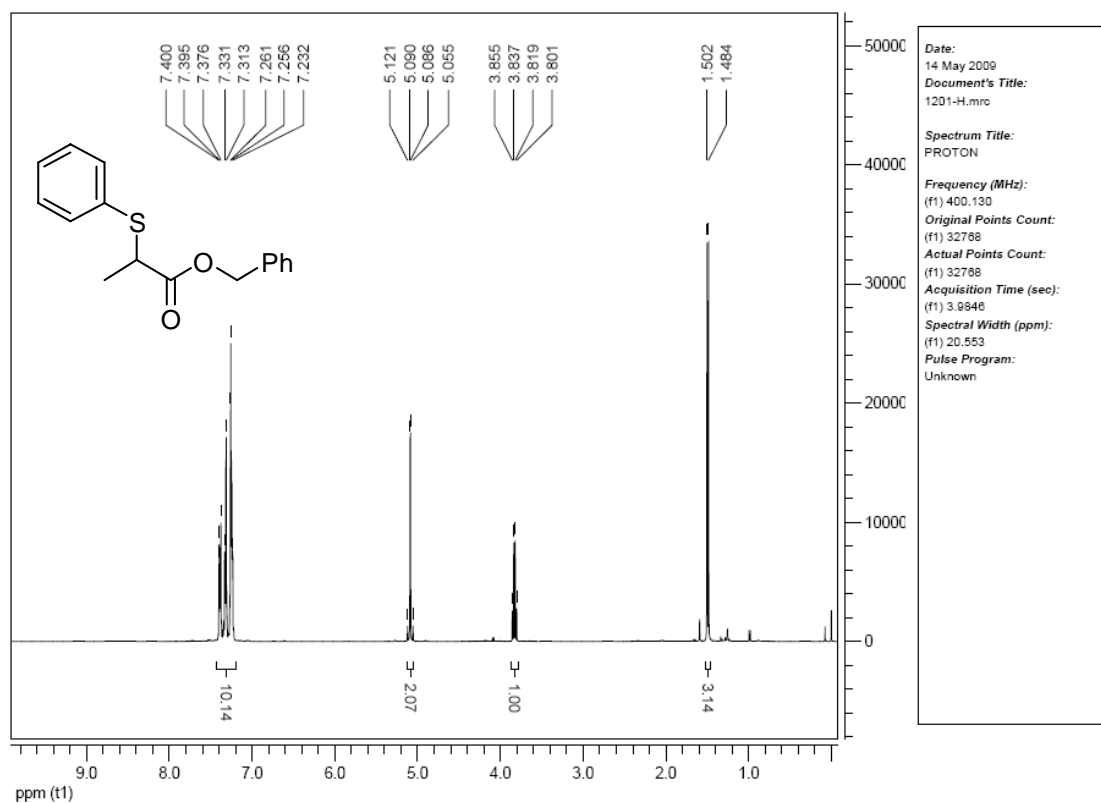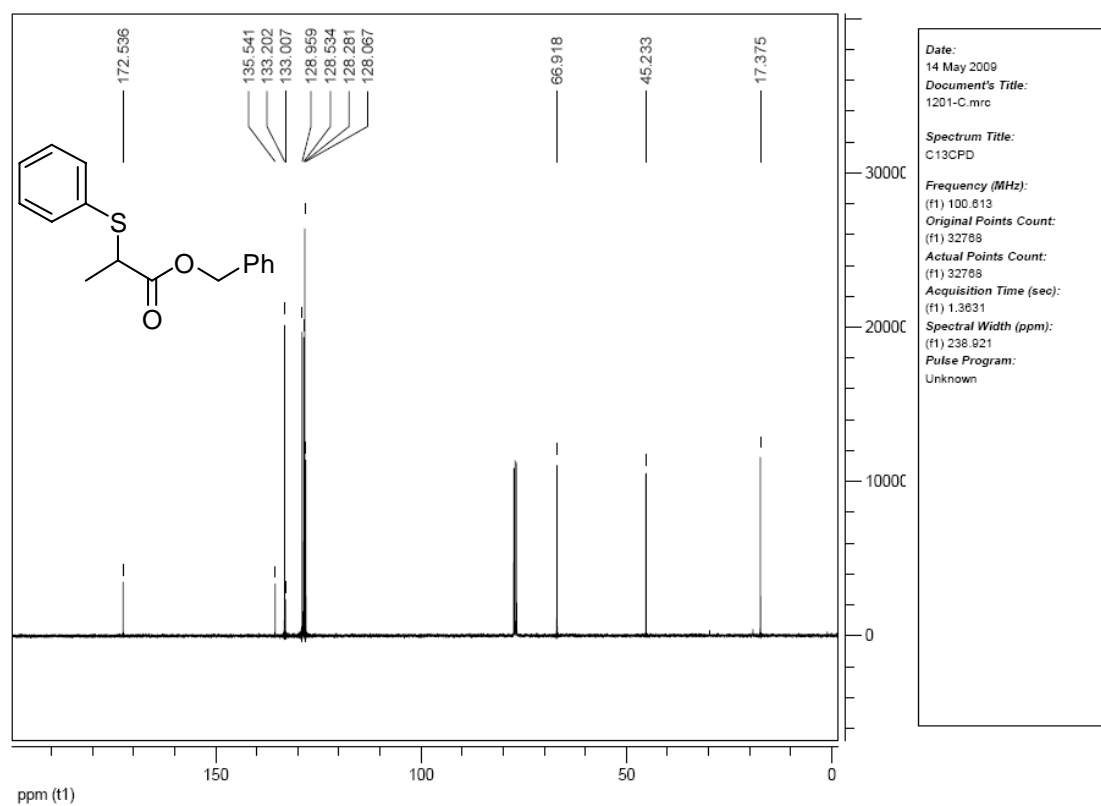

### Benzyl 2-(4-methoxyphenylthio)propionate (3o)

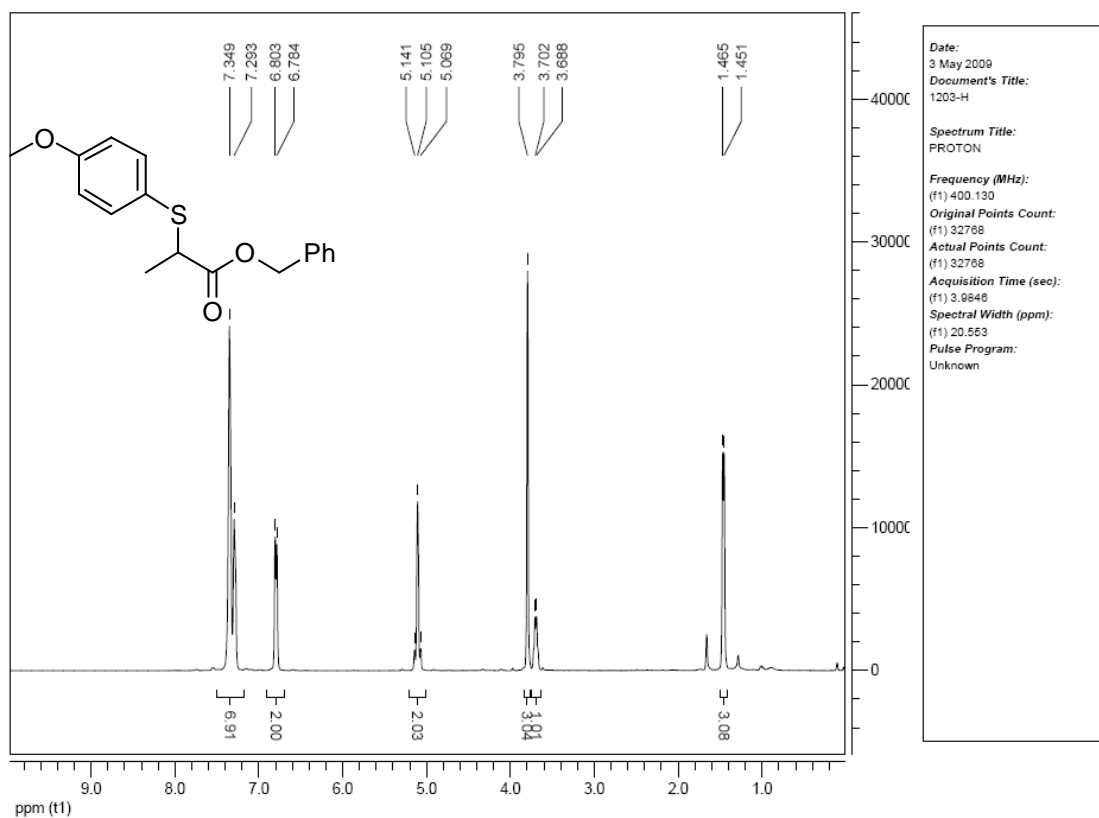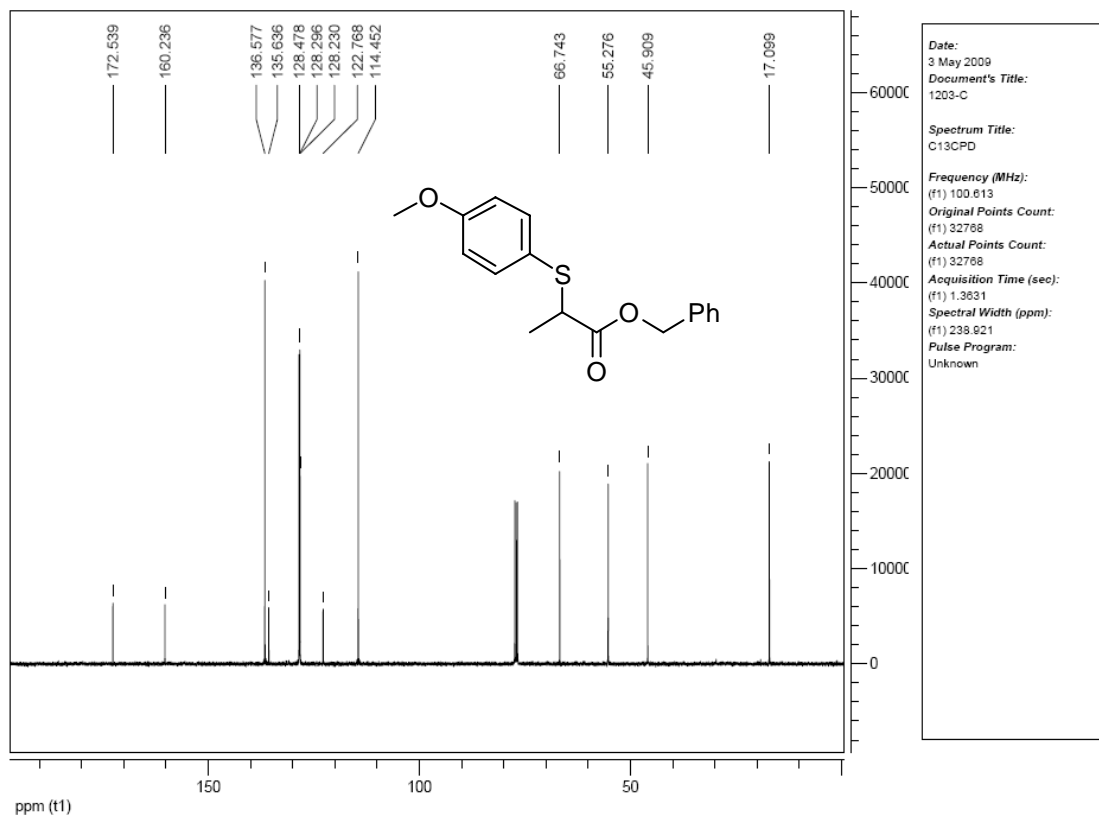

### Benzyl 2-(4-chlorophenylthio)propionate (3p)

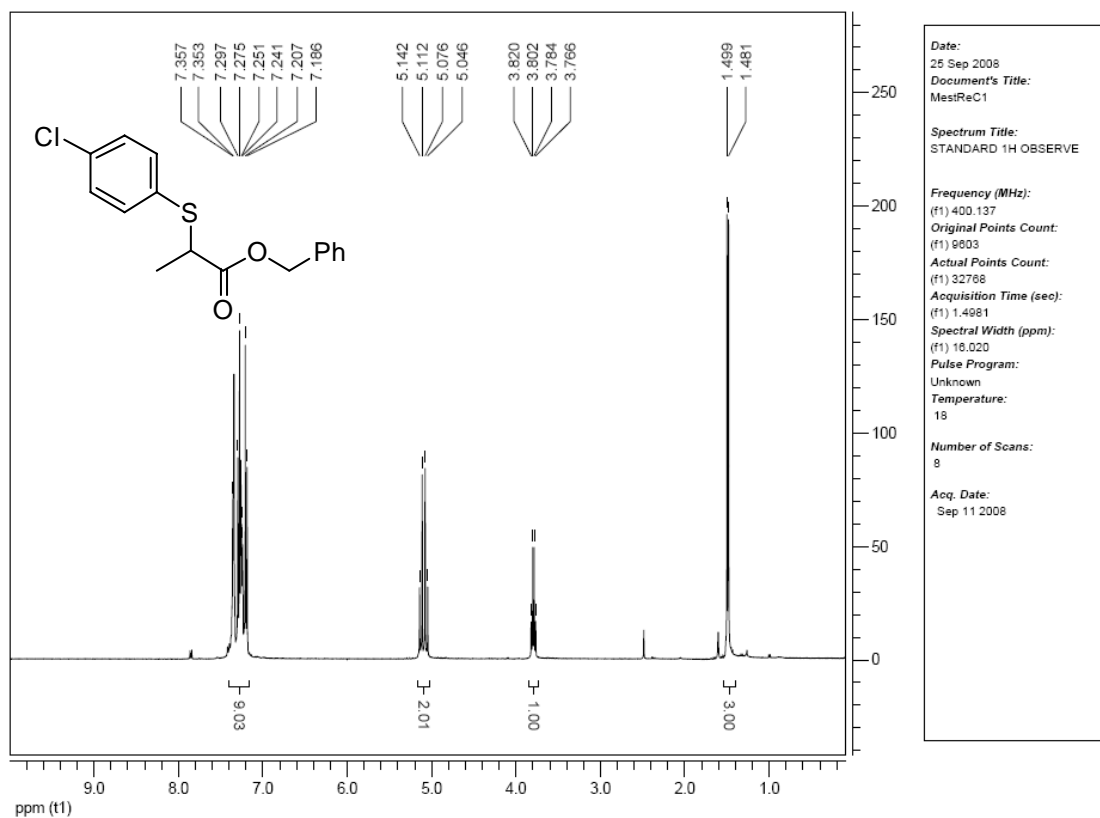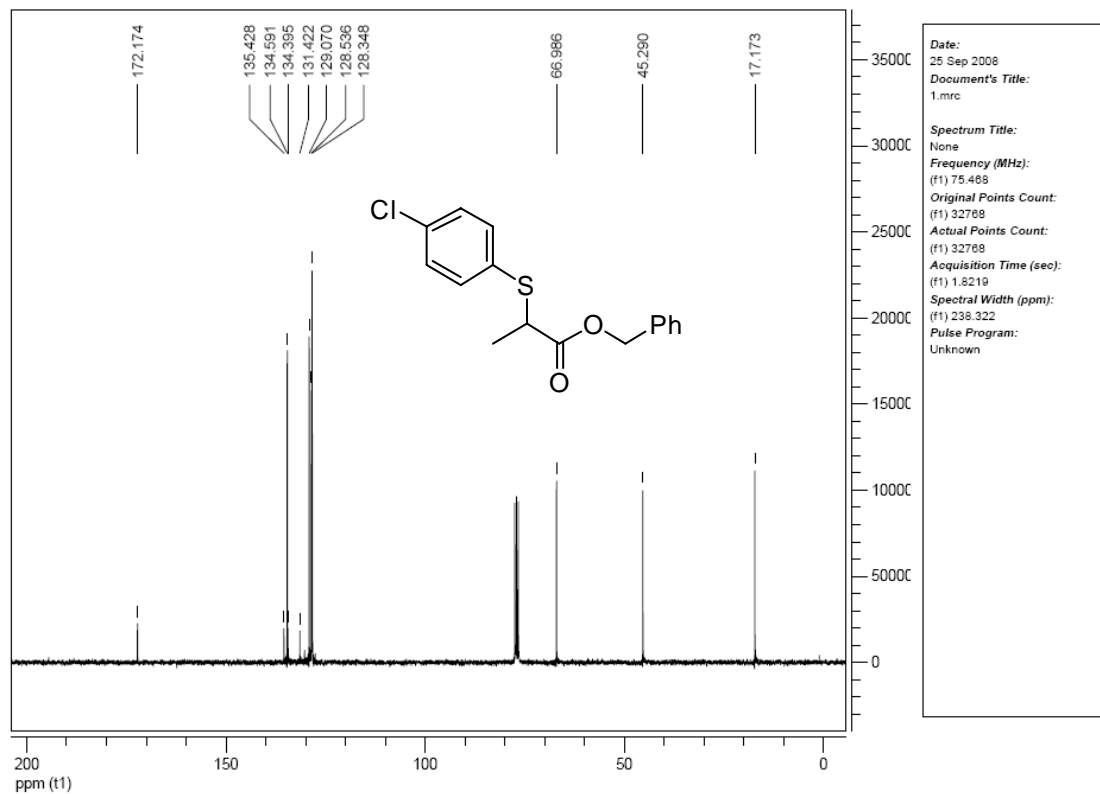

### Benzyl 2-(3-methoxyphenylthio)propionate (3q)

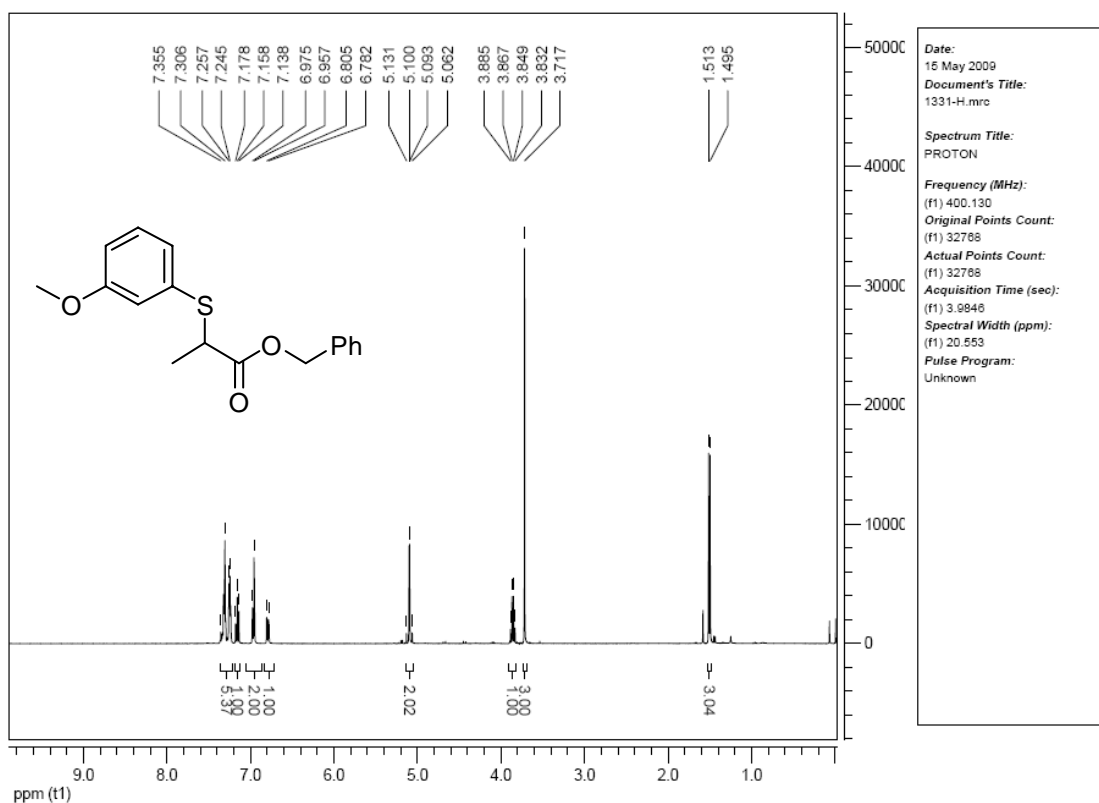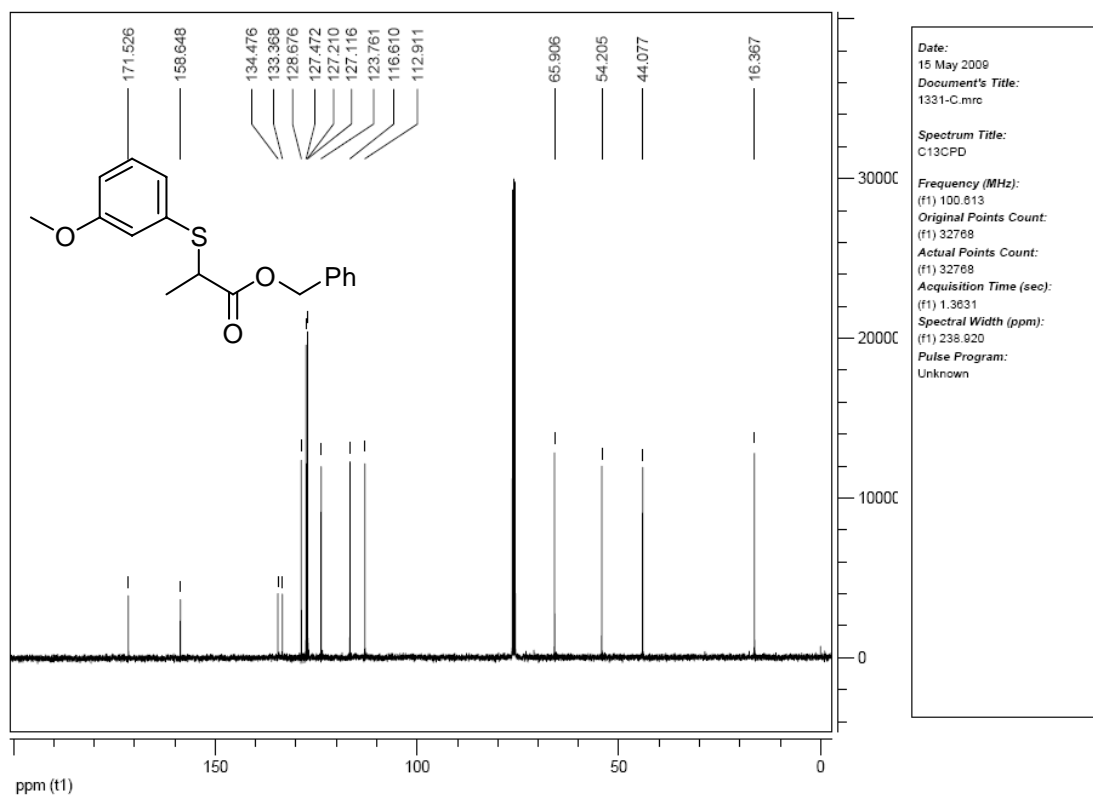

### Benzyl 2-(3-chlorophenylthio)propionate (3r)

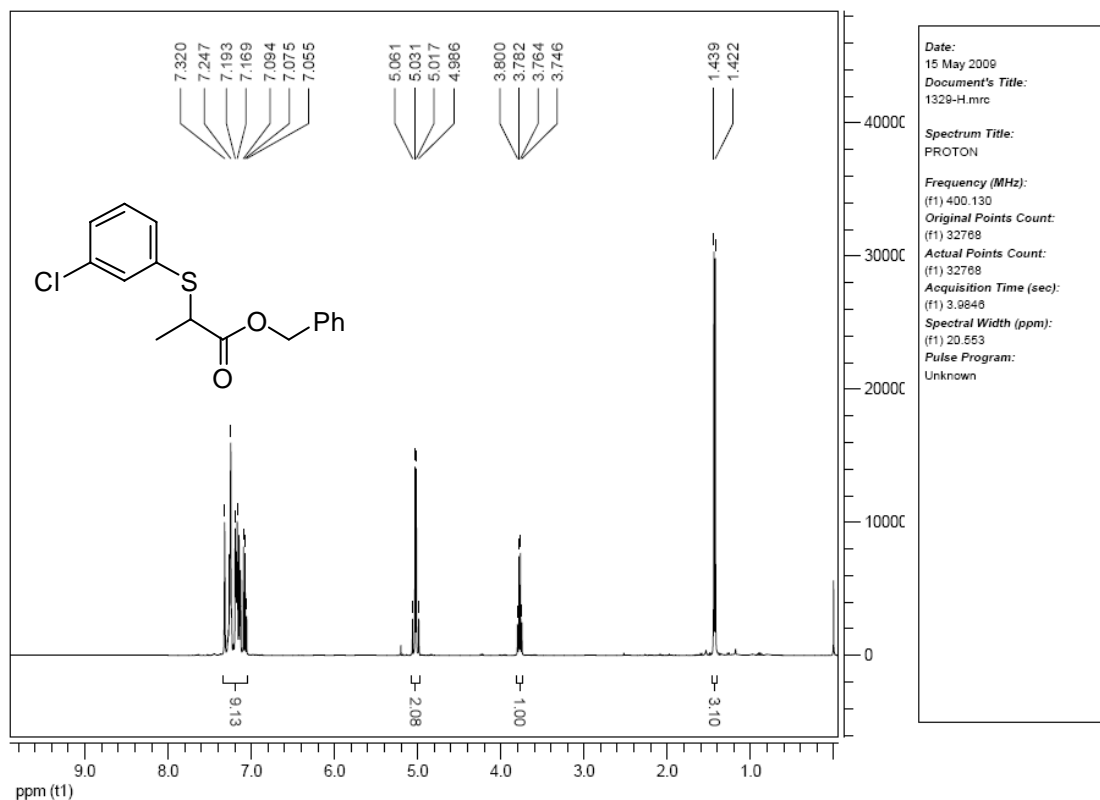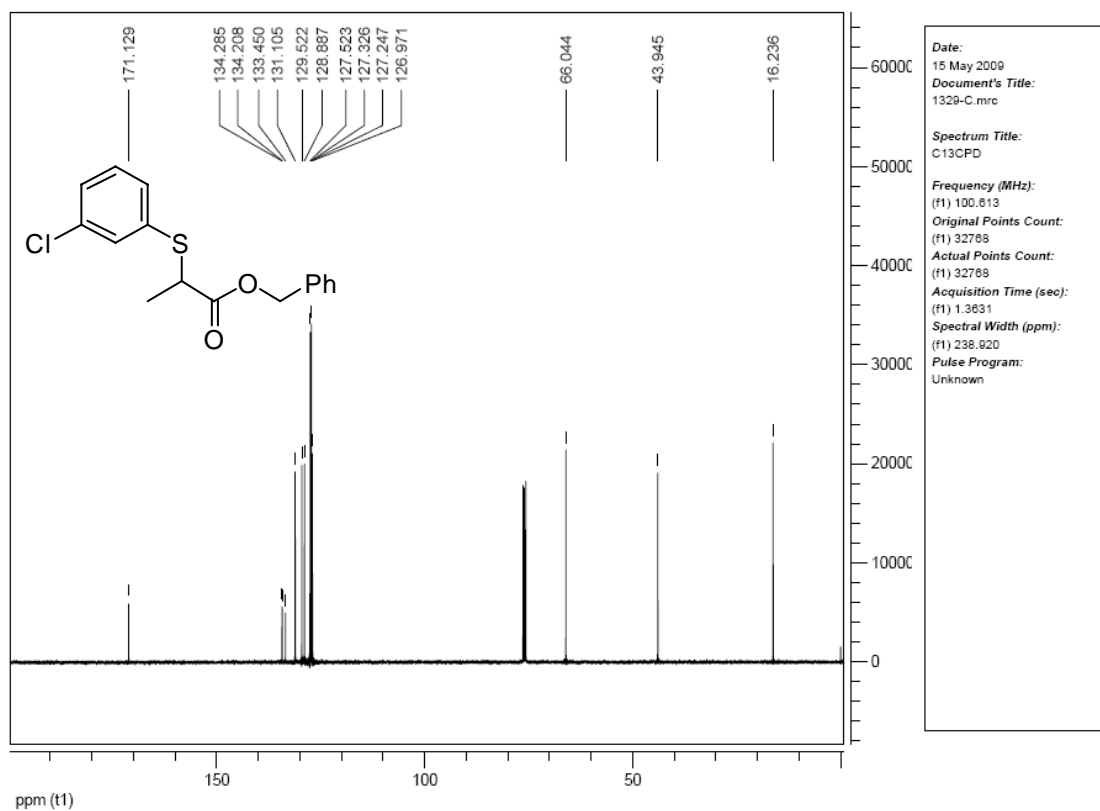

### Benzyl 2-(2-methoxyphenylthio)propionate (3s)

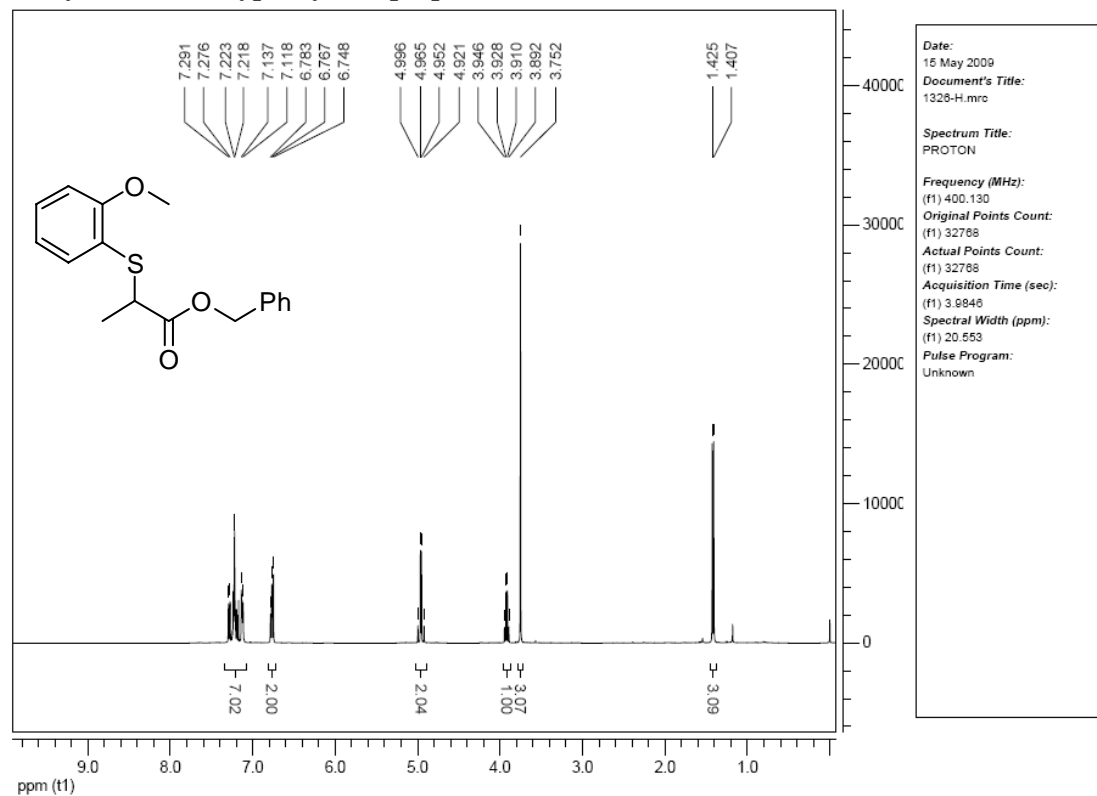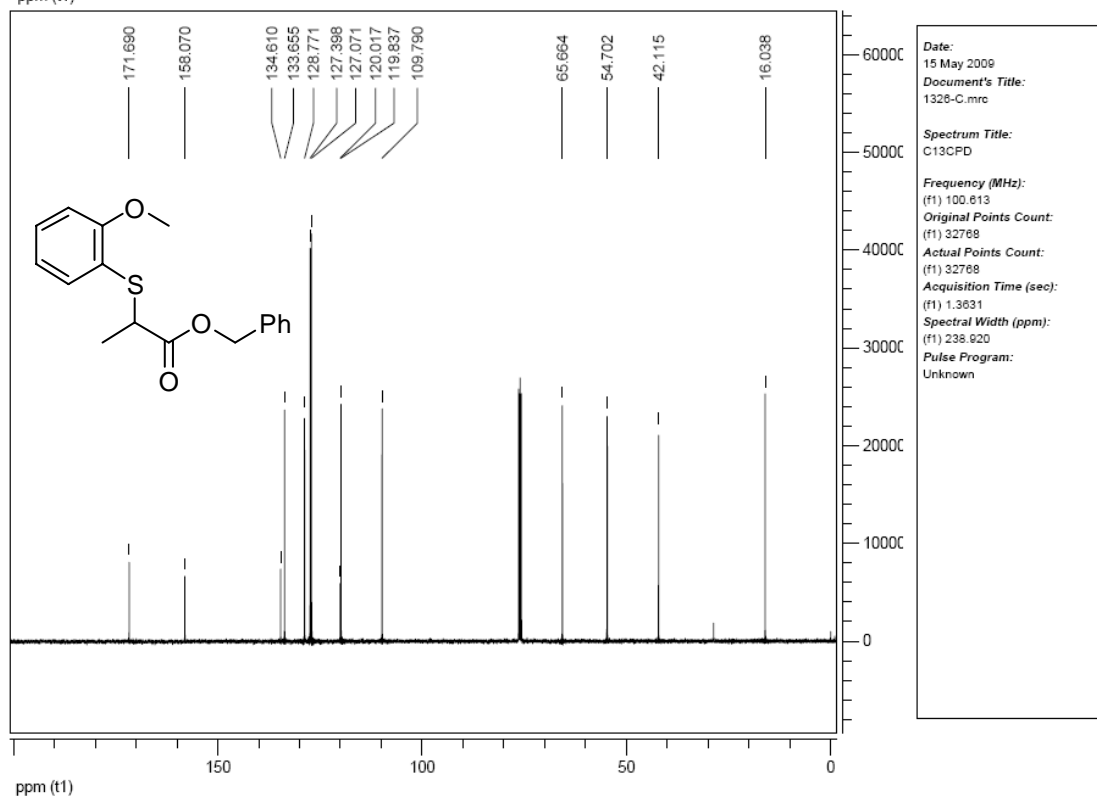

### Benzyl 2-(2-chlorophenylthio)propionate (3t)

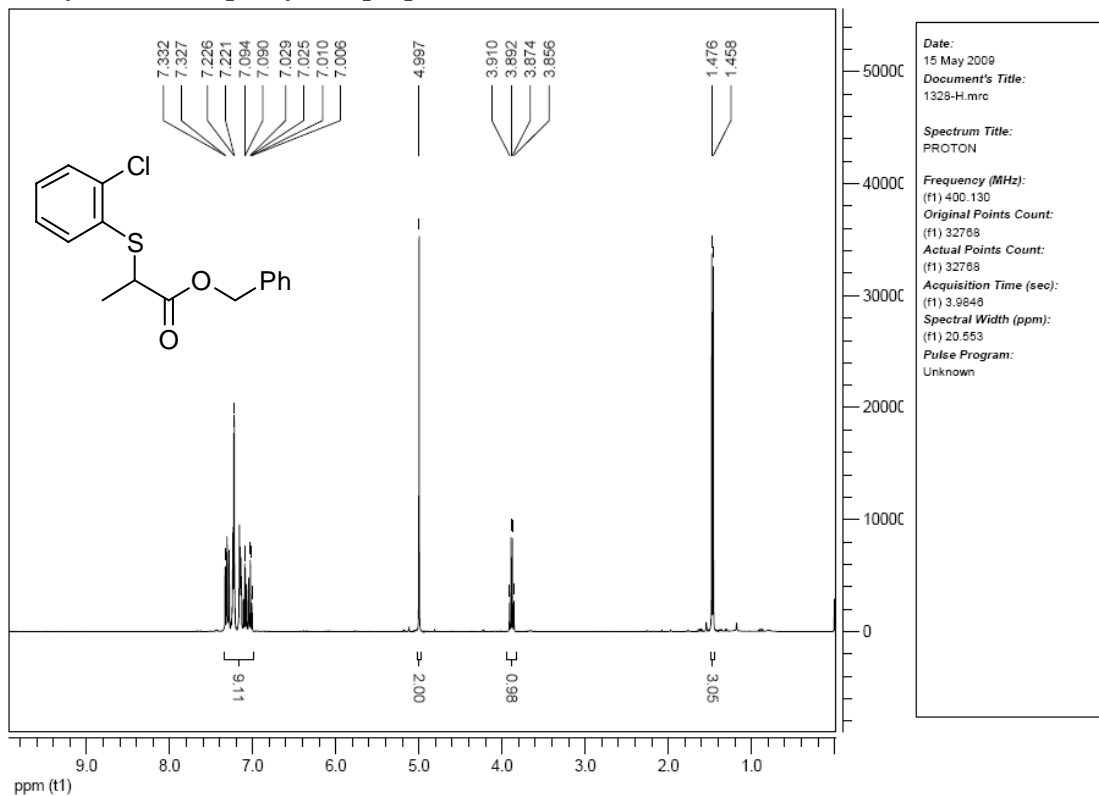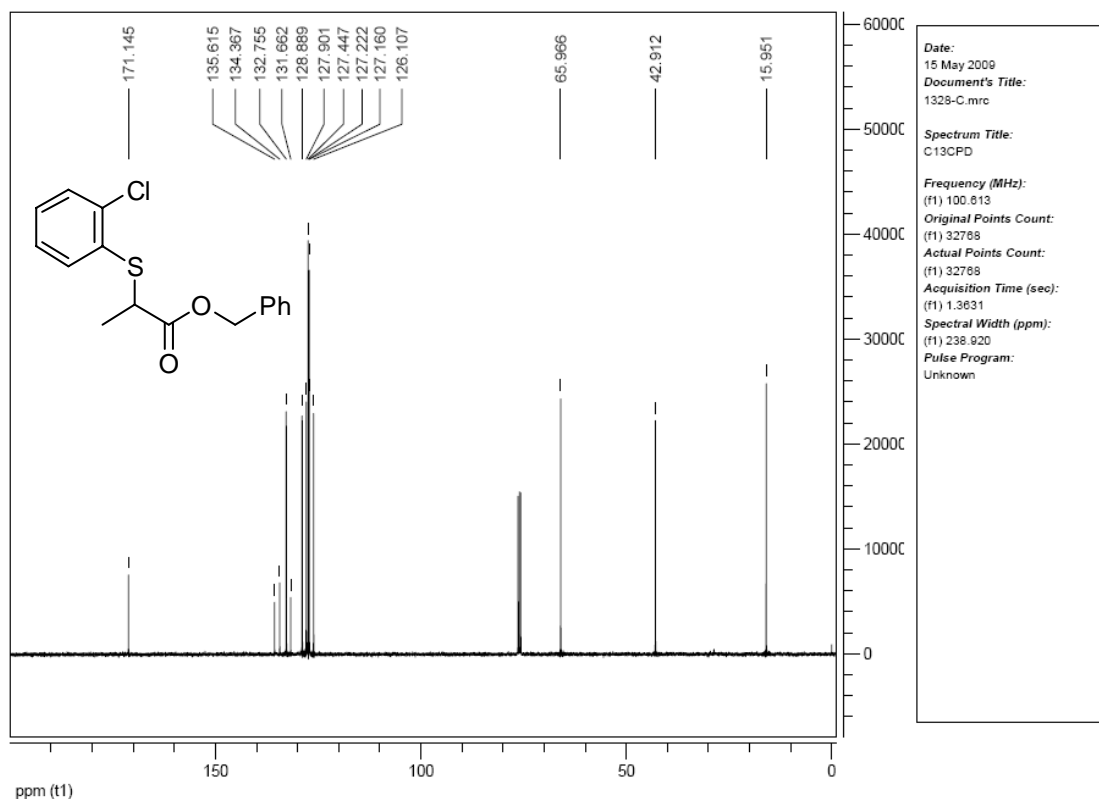

### Benzyl 2-(2,6-dichlorophenylthio)propionate (3u)

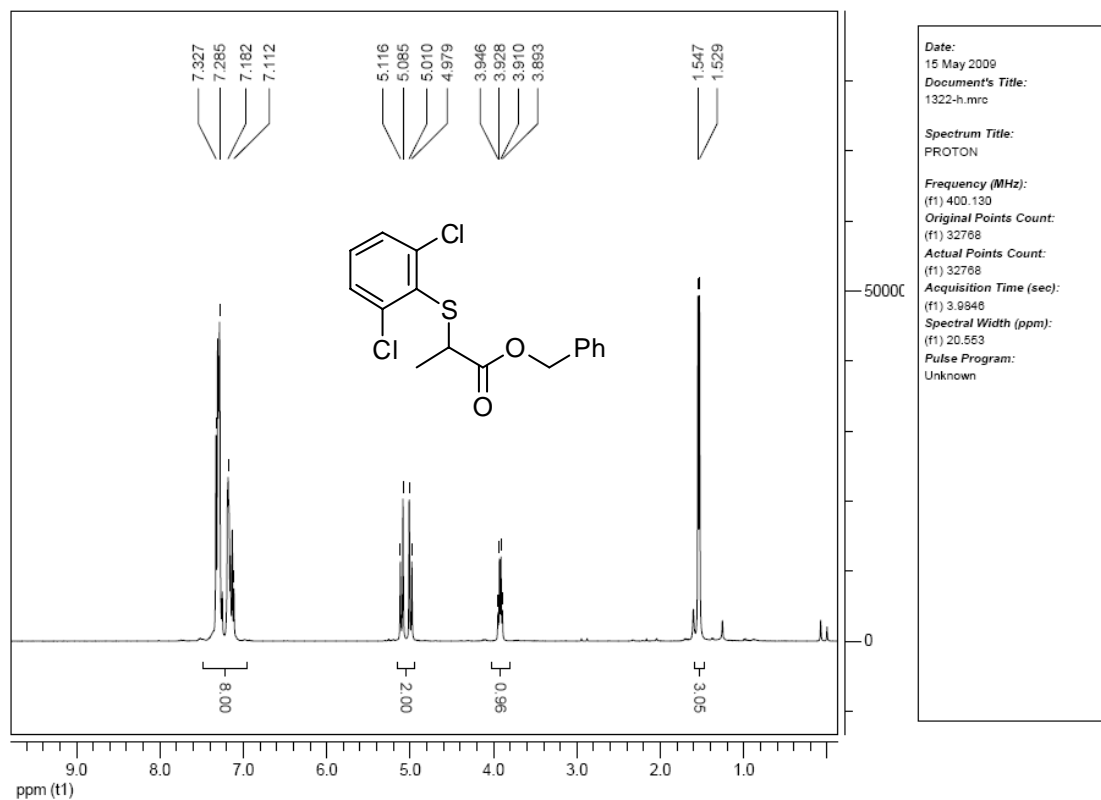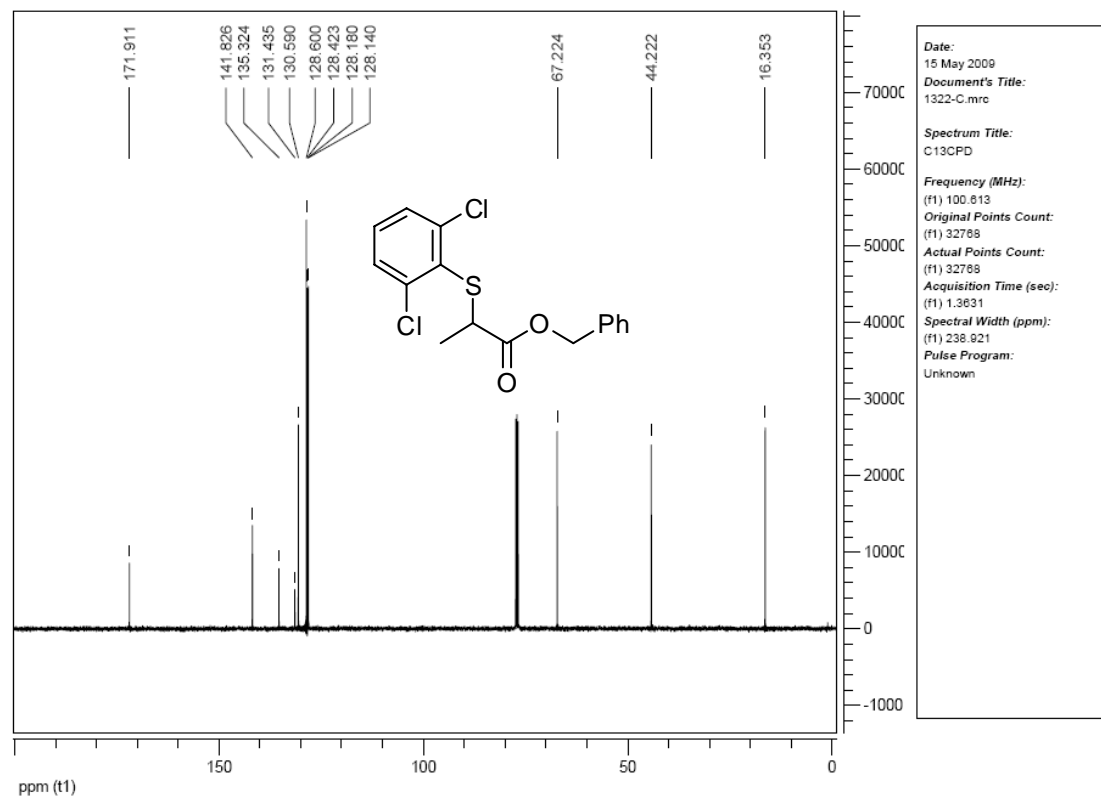

### Benzyl 2-(butylthio)propionate (3v)

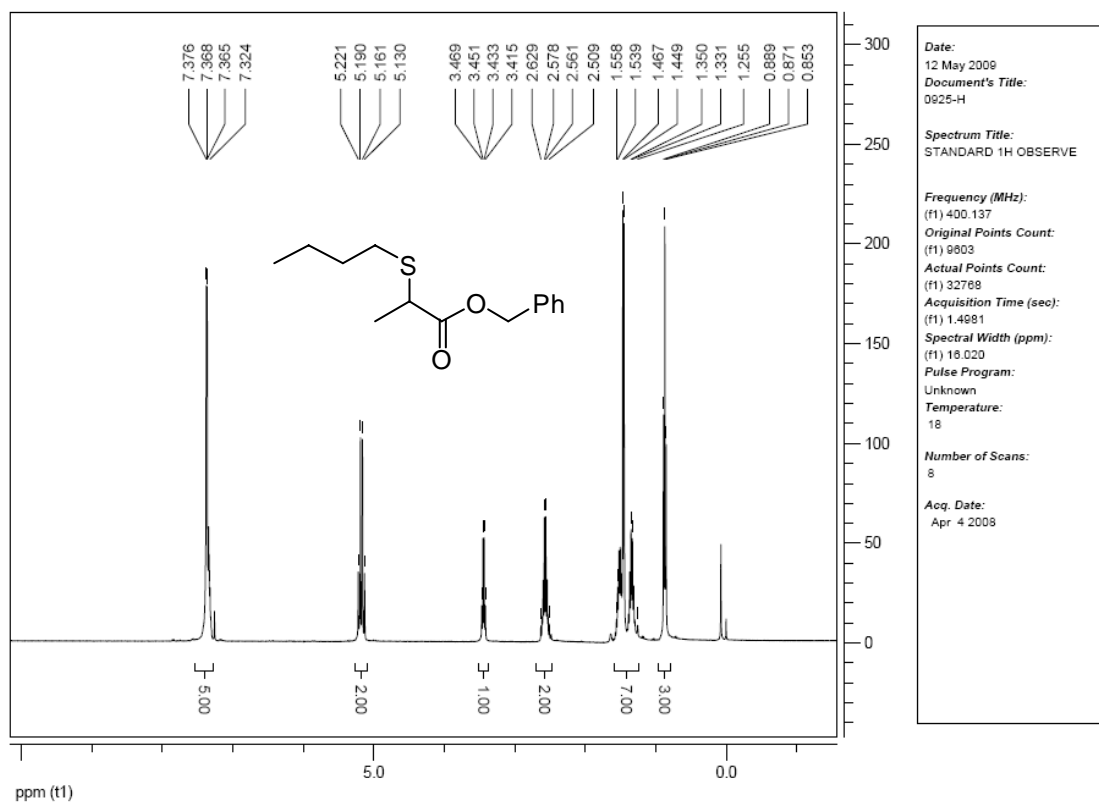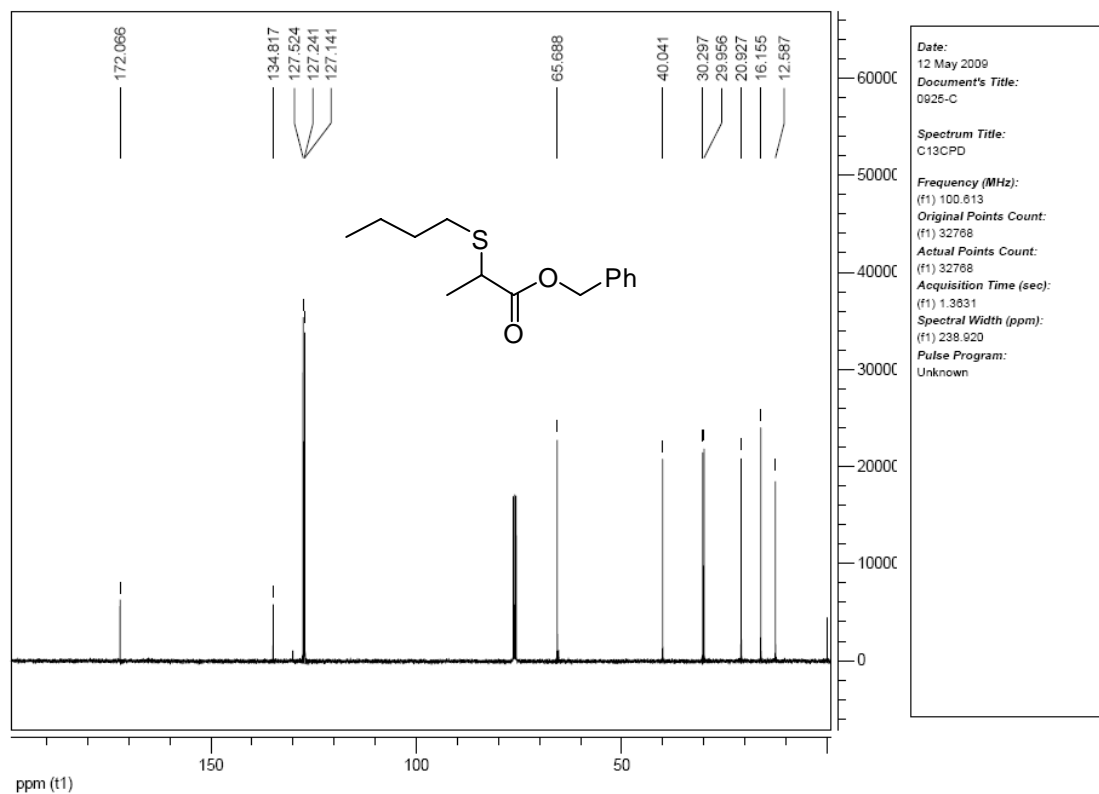

### Benzyl 2-(isobutylthio)propionate (3w)

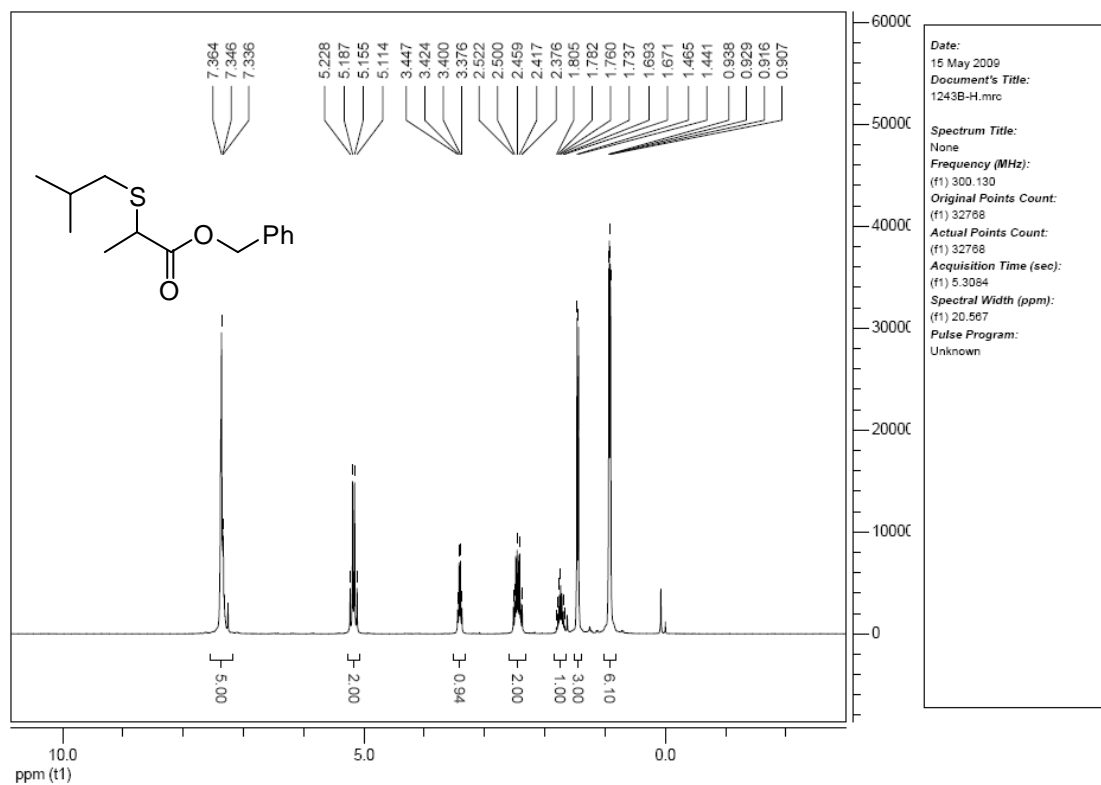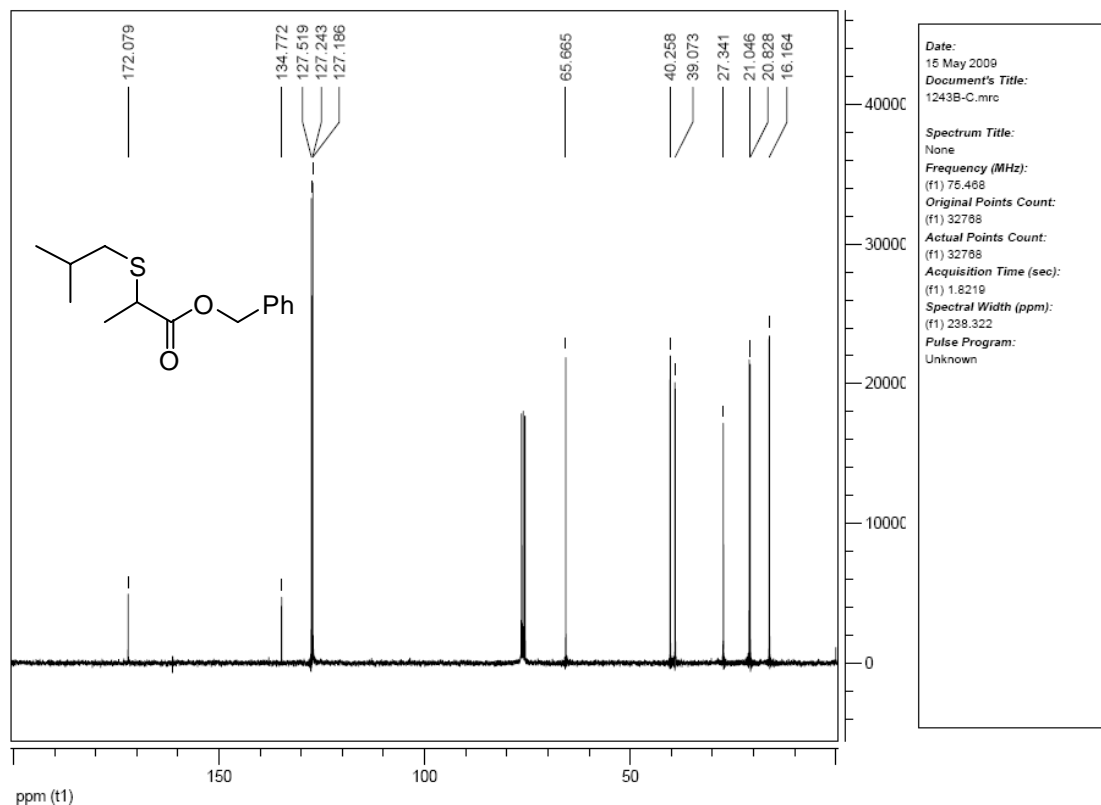

### Benzyl 2-(isopropylthio)propionate (3x)

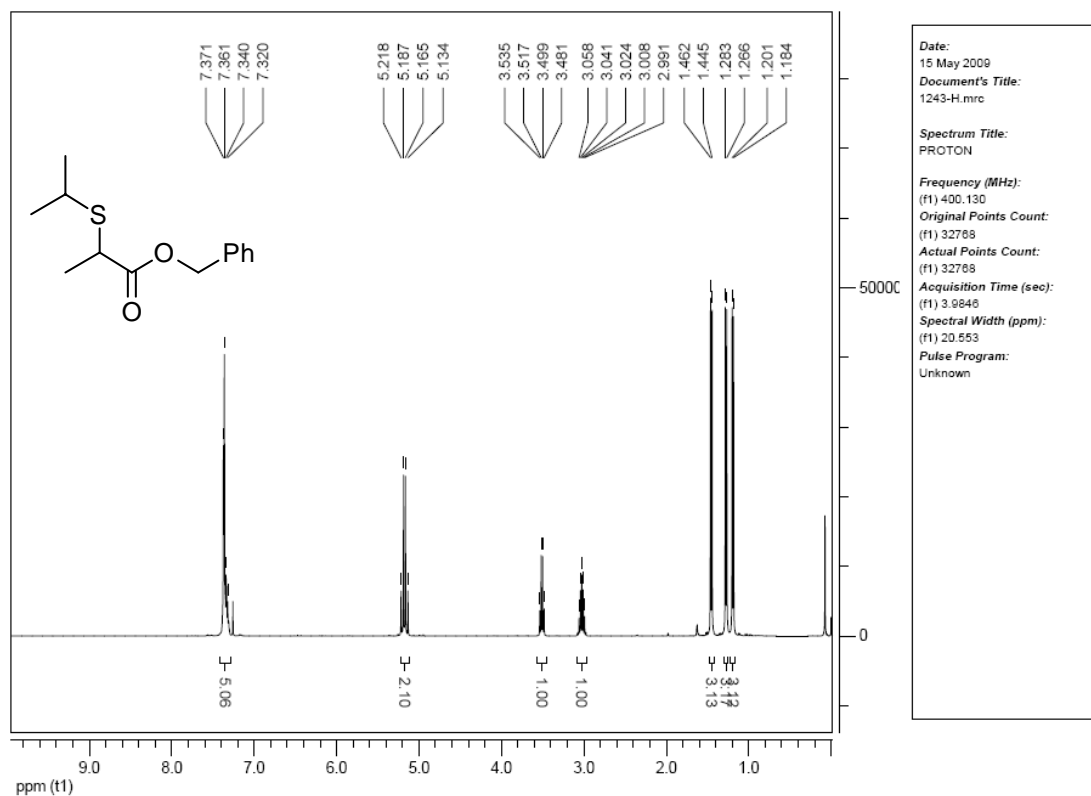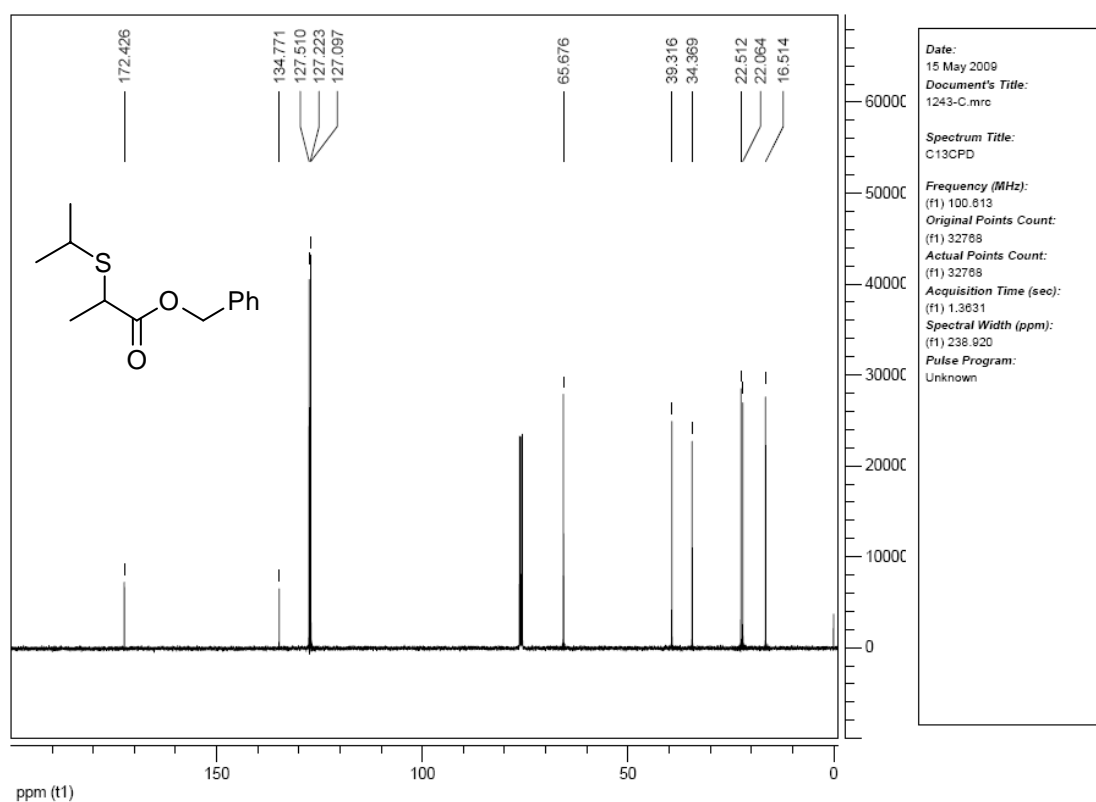

### Benzyl 2-(tritylthio)propionate (3y)

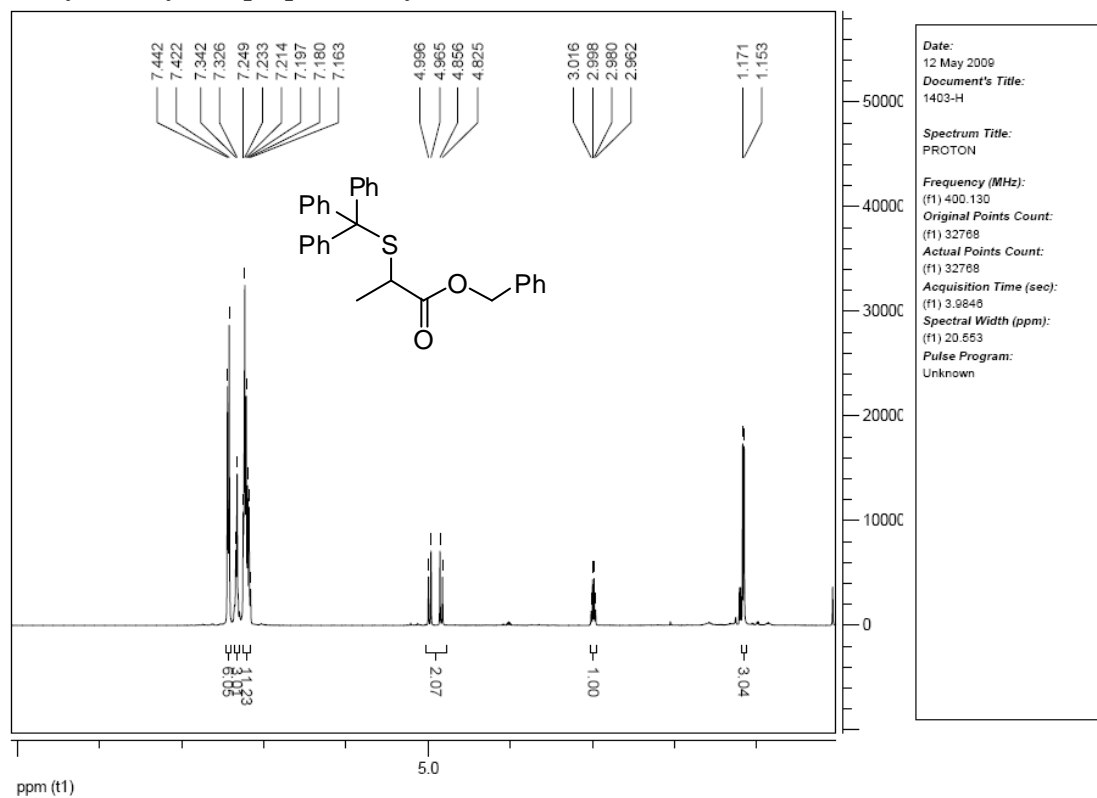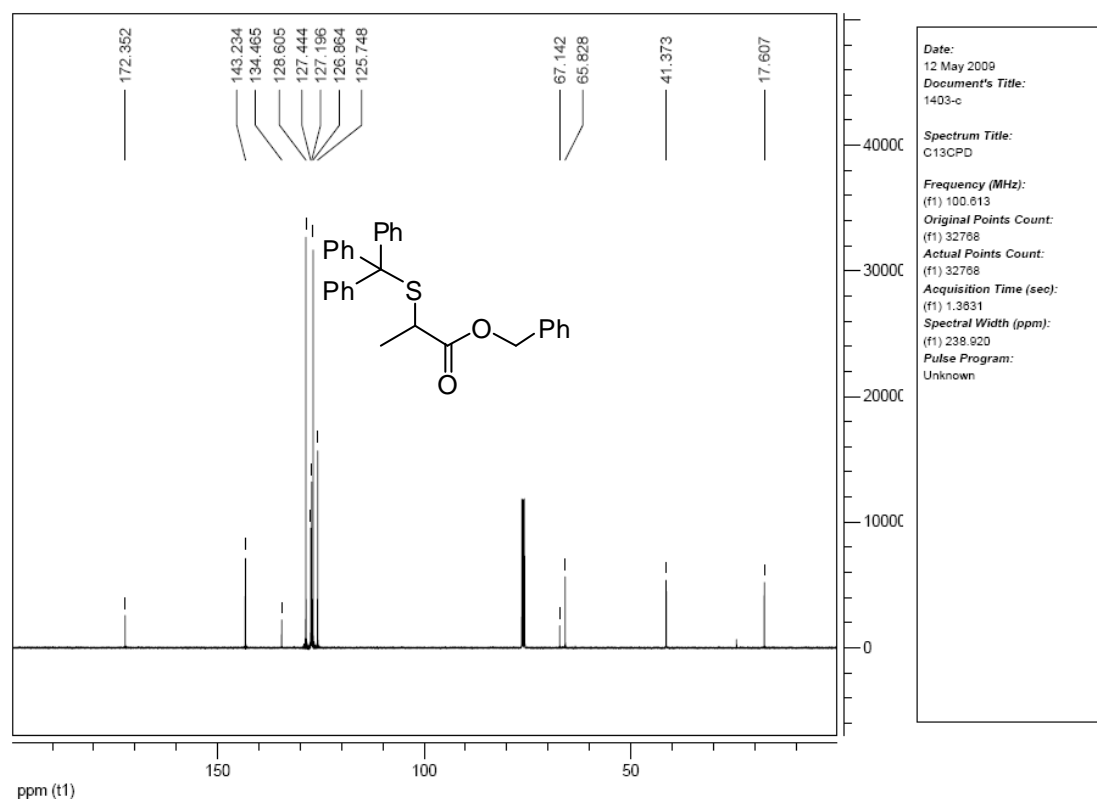

## 5. HPLC and SFC Charts for S-H insertion Products

### (+)-Benzyl 2-(benzylthio)propionate (3a)

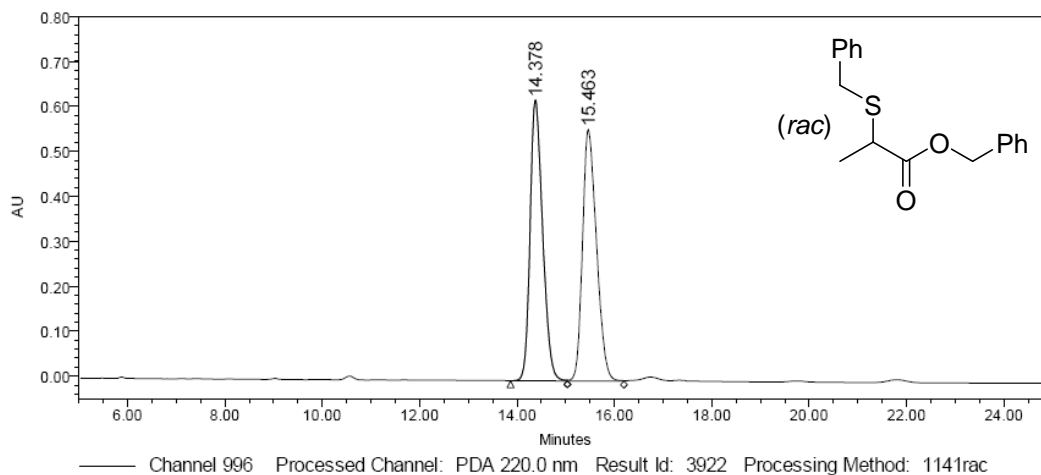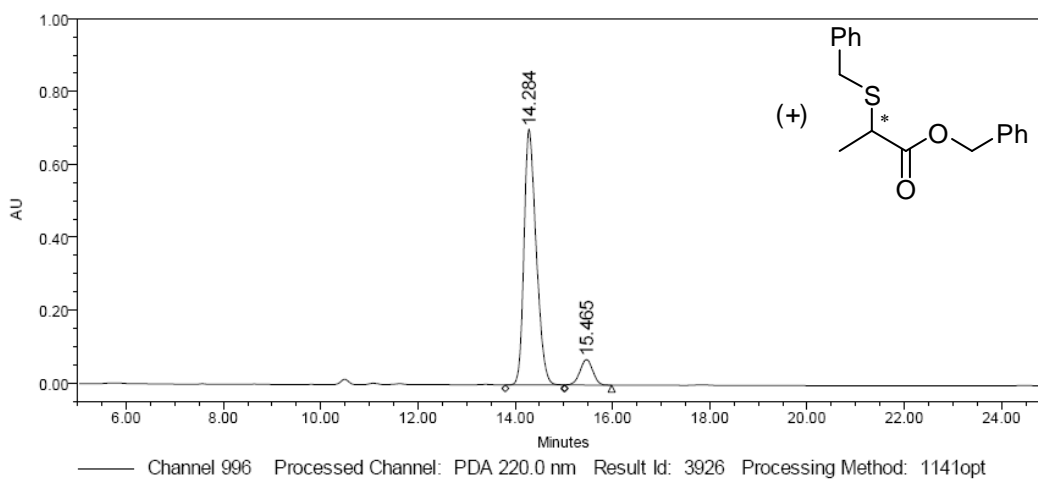

|   | Processed Channel Descr. | RT     | Area     | % Area | Height |
|---|--------------------------|--------|----------|--------|--------|
| 1 | PDA 220.0 nm             | 14.284 | 12235642 | 90.50  | 702233 |
| 2 | PDA 220.0 nm             | 15.465 | 1283800  | 9.50   | 69724  |

**(R)-Ethyl 2-(benzylthio)propionate (3b)**

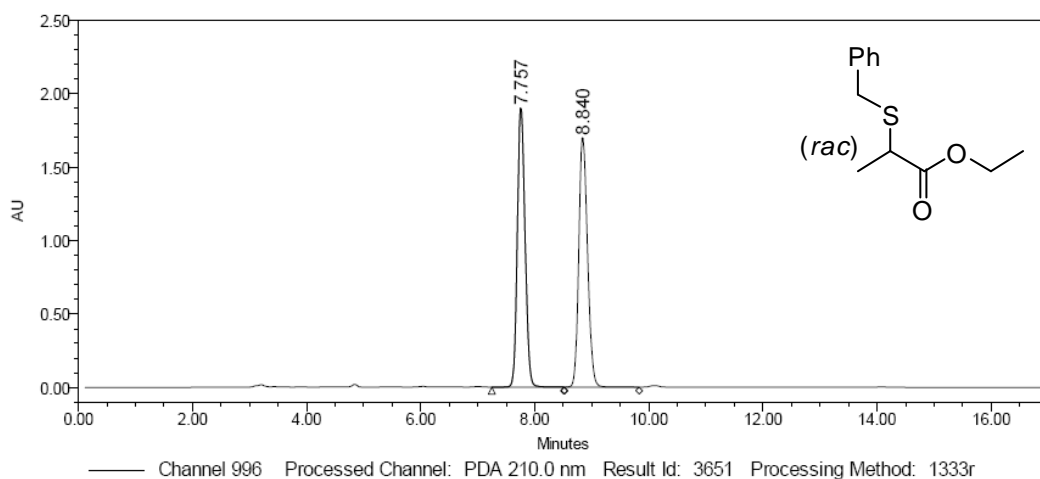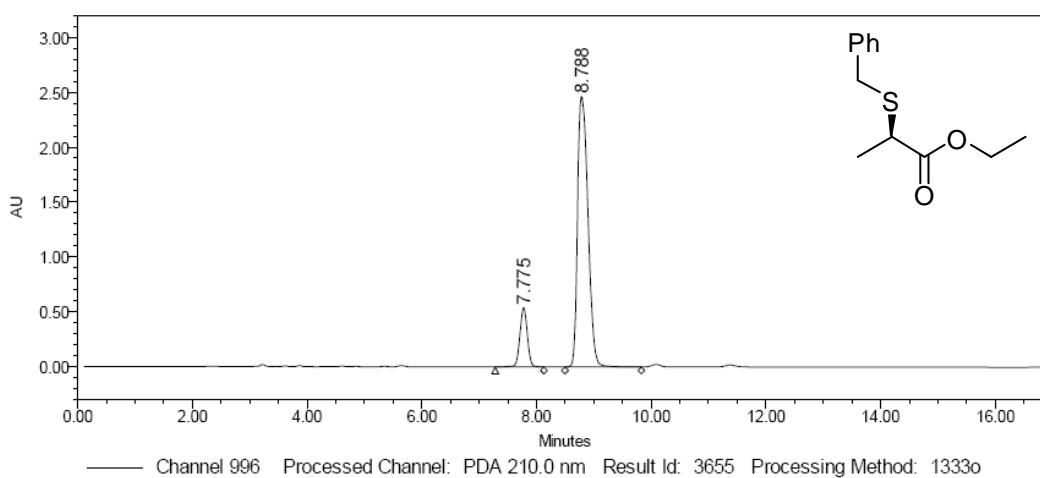

|   | Processed Channel Descr. | RT    | Area     | % Area | Height  |
|---|--------------------------|-------|----------|--------|---------|
| 1 | PDA 210.0 nm             | 7.775 | 4802436  | 13.31  | 541278  |
| 2 | PDA 210.0 nm             | 8.788 | 31276126 | 86.69  | 2481210 |

**(+)-tert-Butyl 2-(benzylthio)propionate (3c)**

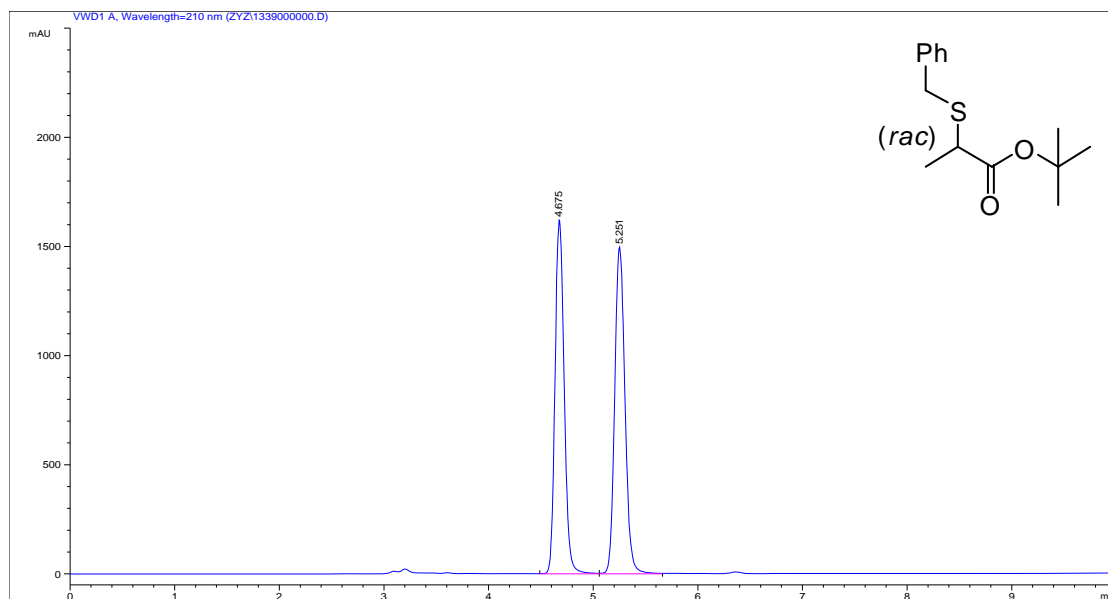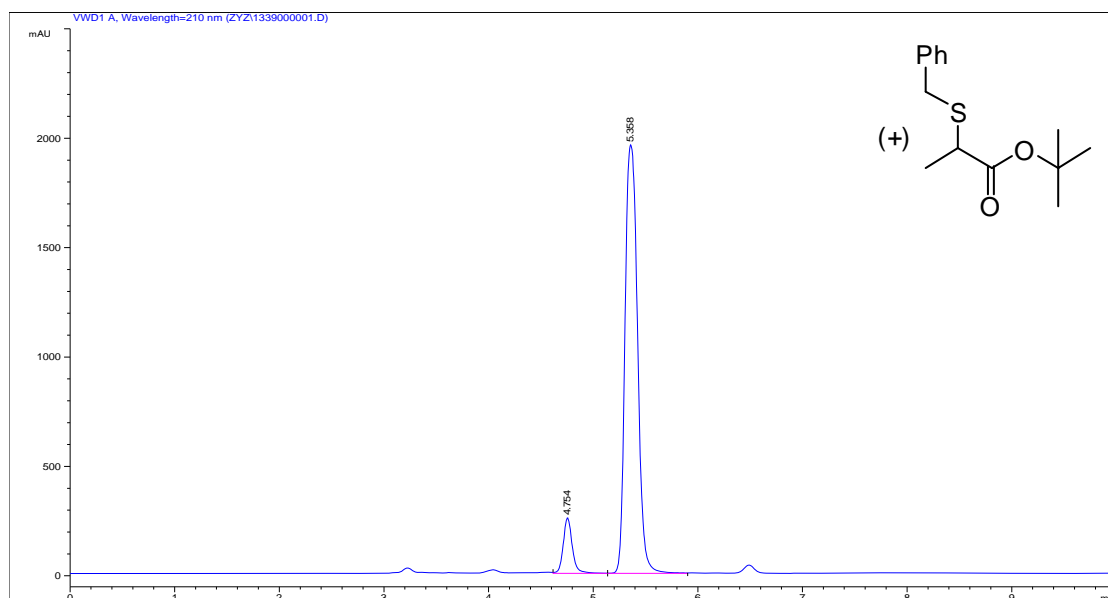

Signal 1: VWD1 A, Wavelength=210 nm

| Peak # | RetTime [min] | Type | Width [min] | Area mAU *s | Height [mAU] | Area %  |
|--------|---------------|------|-------------|-------------|--------------|---------|
| 1      | 4.754         | VV   | 0.0907      | 1527.44092  | 253.56578    | 8.6250  |
| 2      | 5.358         | VV   | 0.1328      | 1.61821e4   | 1958.29248   | 91.3750 |

**(+)-Benzyl 2-(4-methoxybenzylthio)propionate (3d)**

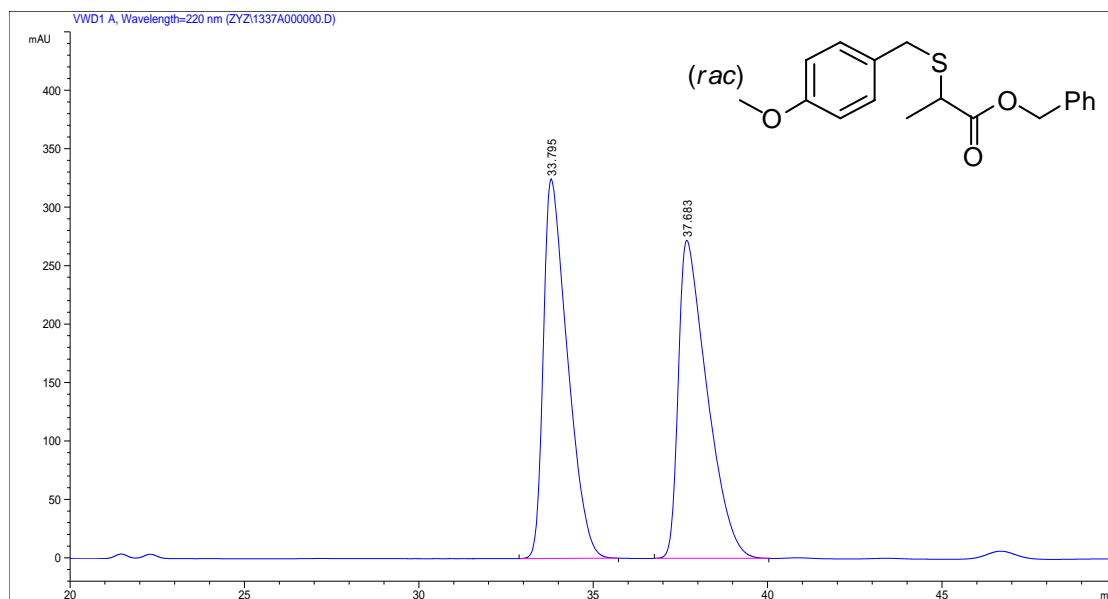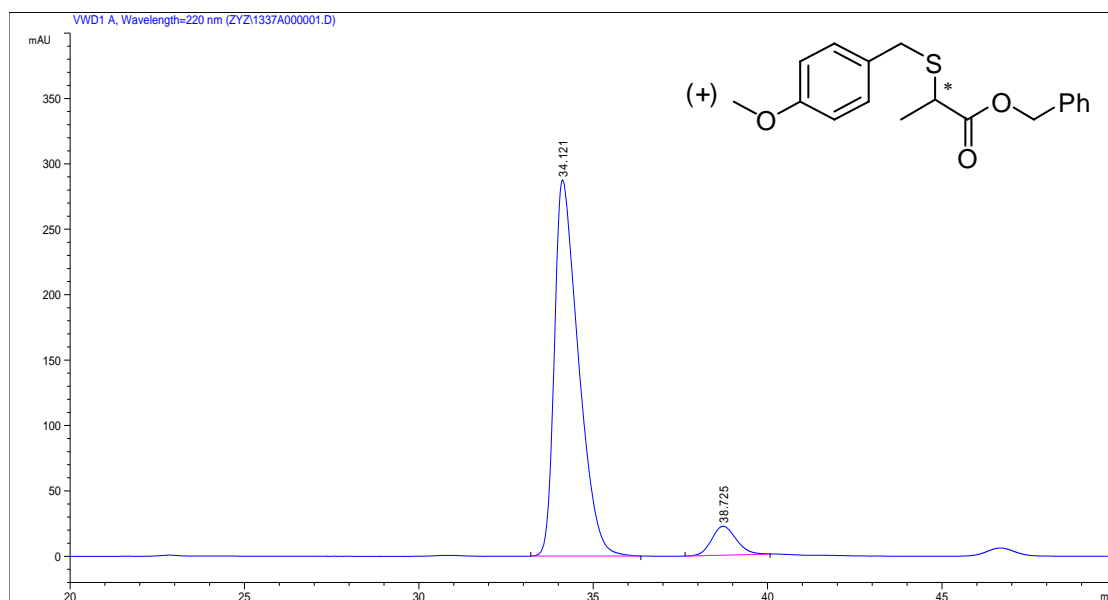

Signal 1: VWD1 A, Wavelength=220 nm

| Peak # | RetTime [min] | Type | Width [min] | Area mAU   | Height [mAU] | Area %  |
|--------|---------------|------|-------------|------------|--------------|---------|
| 1      | 34.121        | BB   | 0.7086      | 1.37386e4  | 287.69446    | 92.6446 |
| 2      | 38.725        | BB   | 0.7455      | 1090.75757 | 22.18112     | 7.3554  |

**(+)-Benzyl 2-(4-chlorobenzylthio)propionate (3e)**

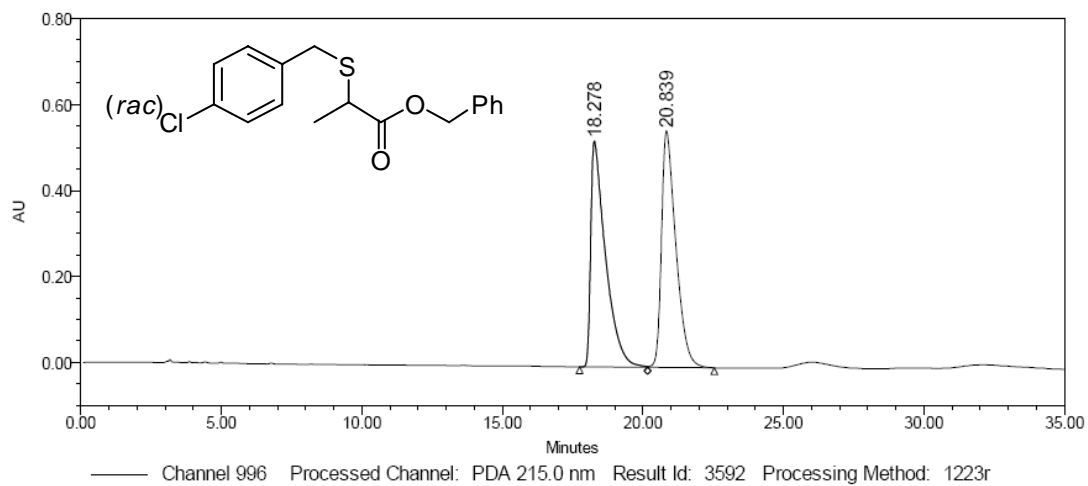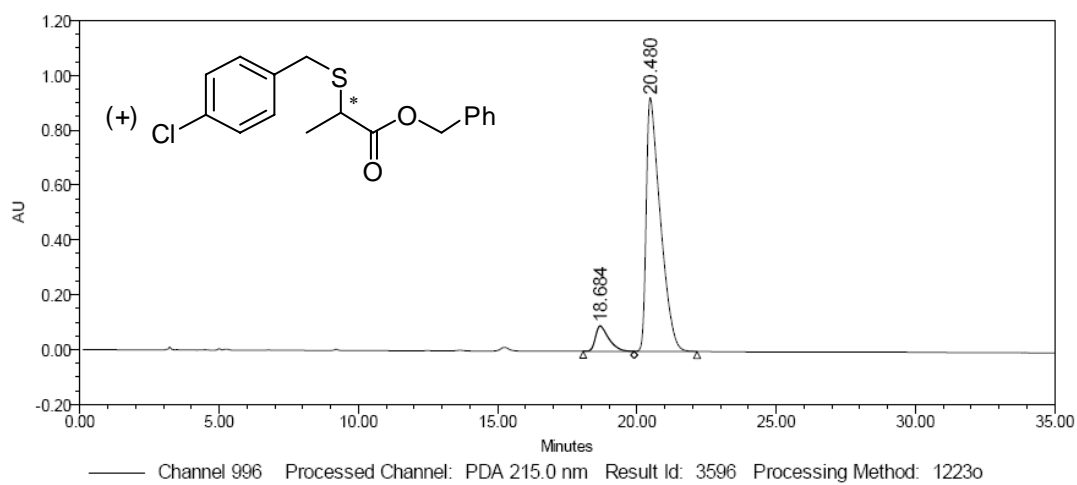

|   | Processed Channel Descr. | RT     | Area     | % Area | Height |
|---|--------------------------|--------|----------|--------|--------|
| 1 | PDA 215.0 nm             | 18.684 | 3083402  | 8.62   | 92495  |
| 2 | PDA 215.0 nm             | 20.480 | 32668773 | 91.38  | 925162 |

**(+)-Benzyl 2-(2-methylbenzylthio)propionate (3f)**

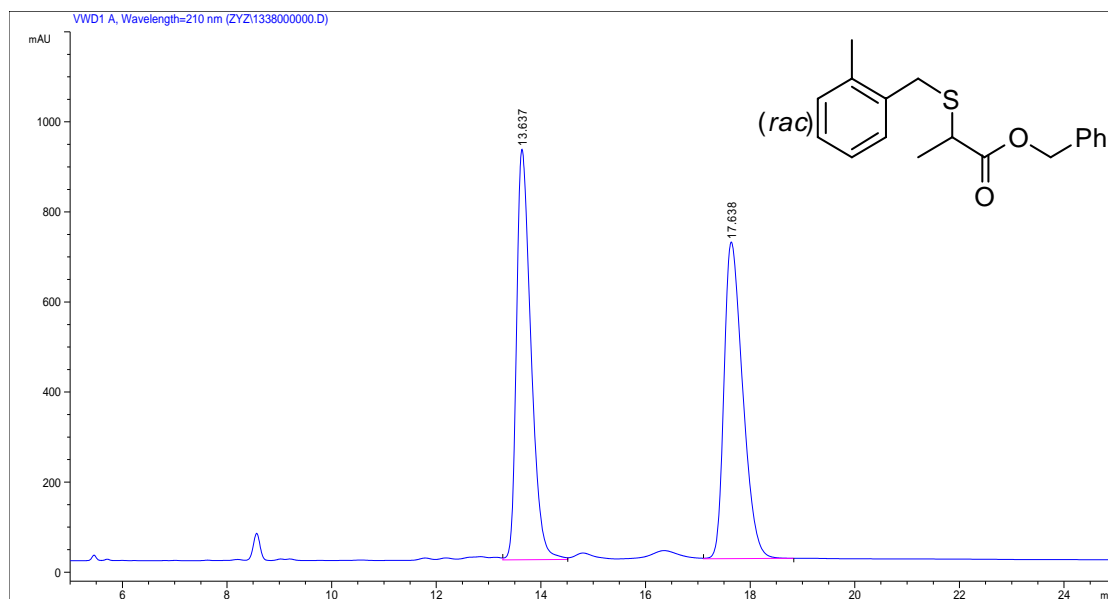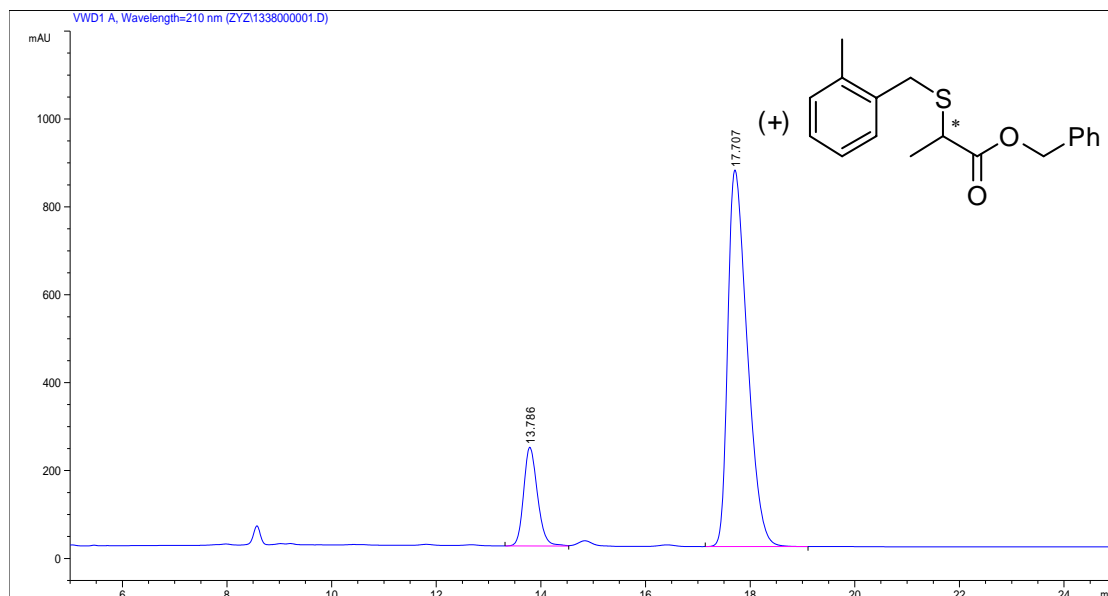

Signal 1: VWD1 A, Wavelength=210 nm

| Peak # | RetTime [min] | Type | Width [min] | Area mAU *s | Height [mAU] | Area %  |
|--------|---------------|------|-------------|-------------|--------------|---------|
| 1      | 13.786        | BV   | 0.2832      | 4135.66553  | 224.66208    | 15.7884 |
| 2      | 17.707        | BB   | 0.3964      | 2.20587e4   | 856.96472    | 84.2116 |

**(+)-Benzyl 2-(2-chlorobenzylthio)propionate (3g)**

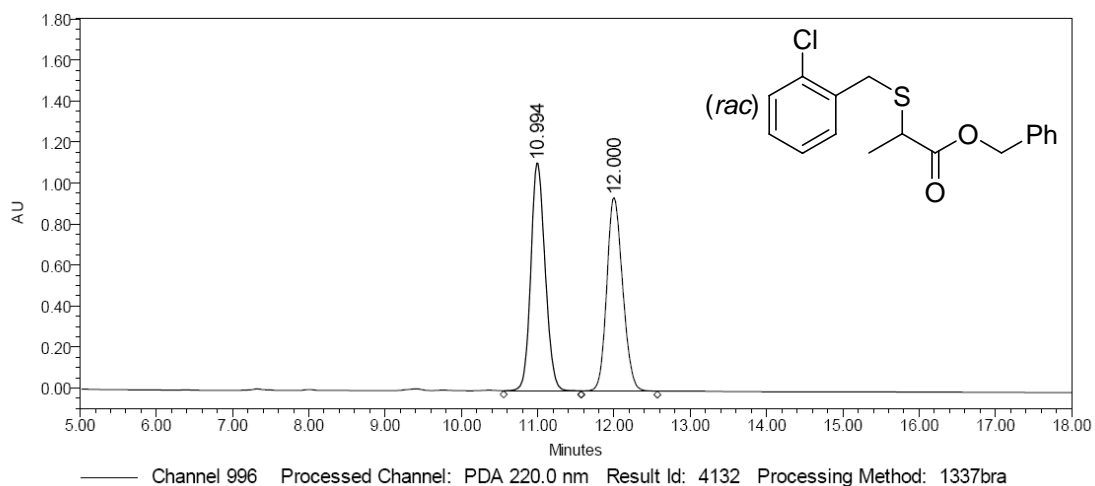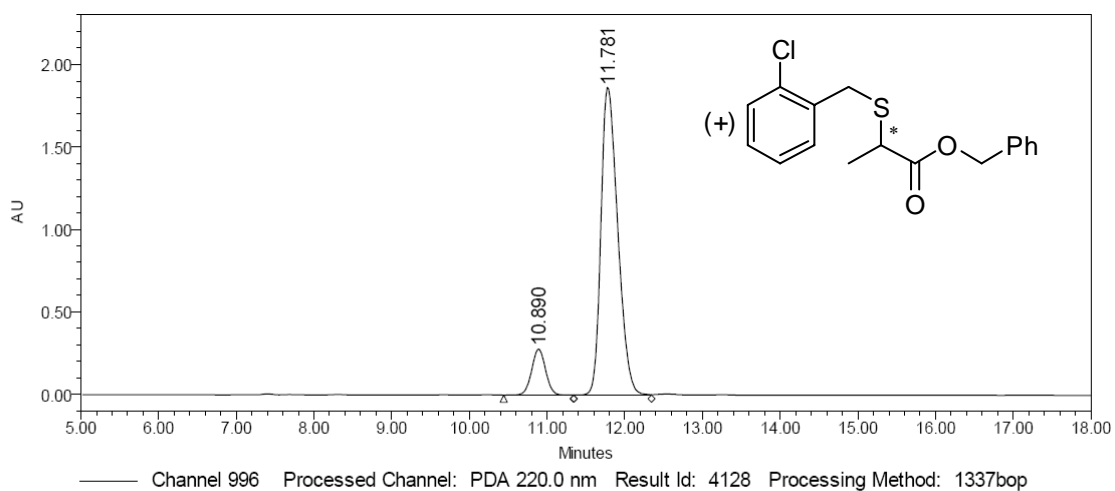

|   | Processed Channel Descr. | RT     | Area     | % Area | Height  |
|---|--------------------------|--------|----------|--------|---------|
| 1 | PDA 220.0 nm             | 10.890 | 3473753  | 11.04  | 279164  |
| 2 | PDA 220.0 nm             | 11.781 | 27993104 | 88.96  | 1870289 |

**(-)-Methyl 2-(benzylthio)-2-phenylacetate (3h)**

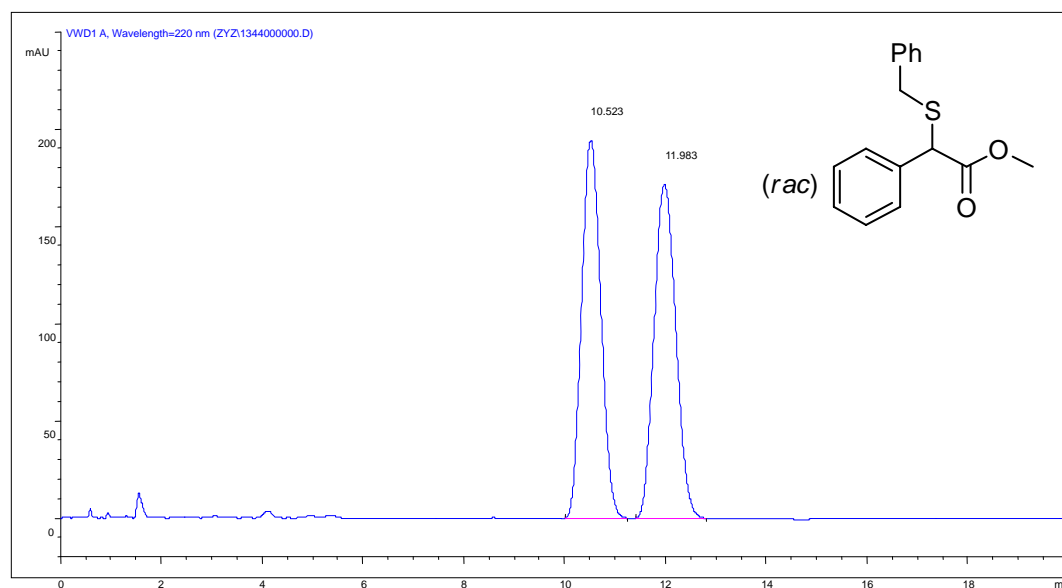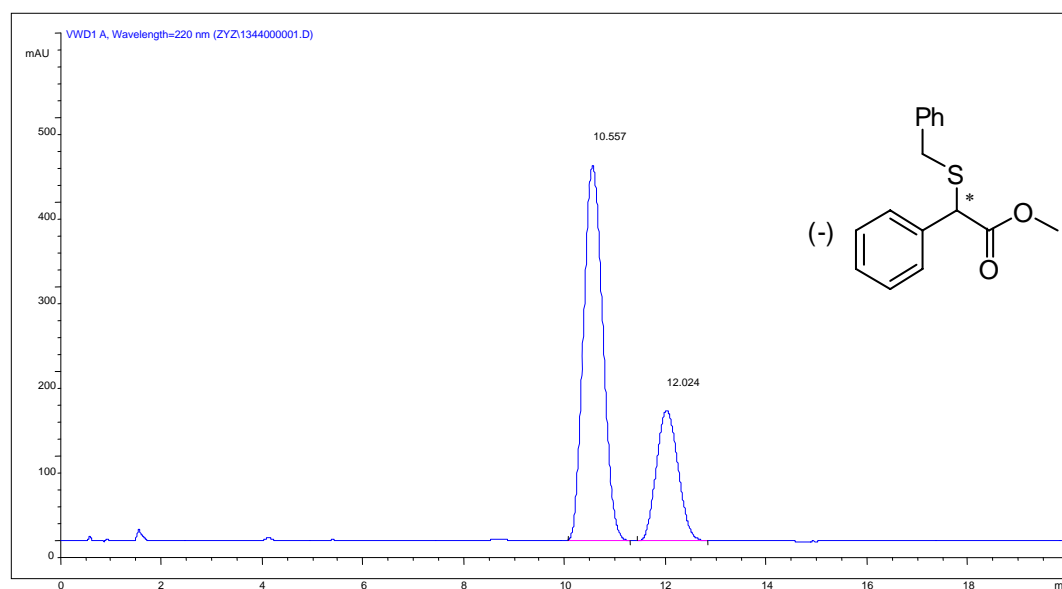

| Peak # | RetTime [min] | Type | Width [min] | Area mAU *s | Area %  |
|--------|---------------|------|-------------|-------------|---------|
| 1      | 10.557        | BB   | 0.4186      | 1.17970e4   | 71.8774 |
| 2      | 12.024        | BB   | 0.4721      | 4615.64453  | 28.1226 |

**(-)-Methyl 2-(benzylthio)-2-o-tolylacetate (3i)**

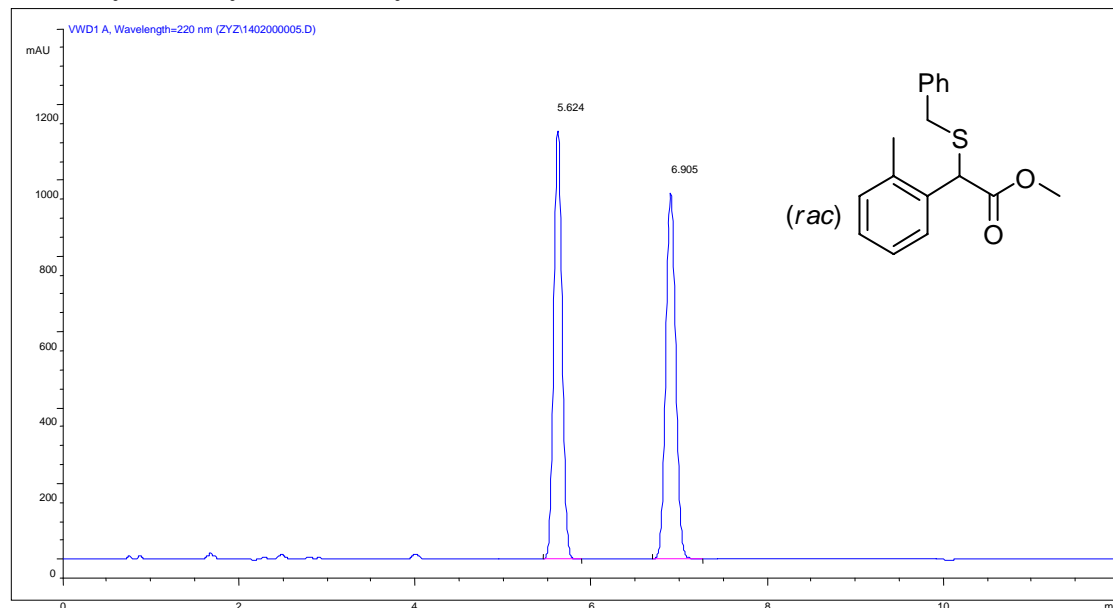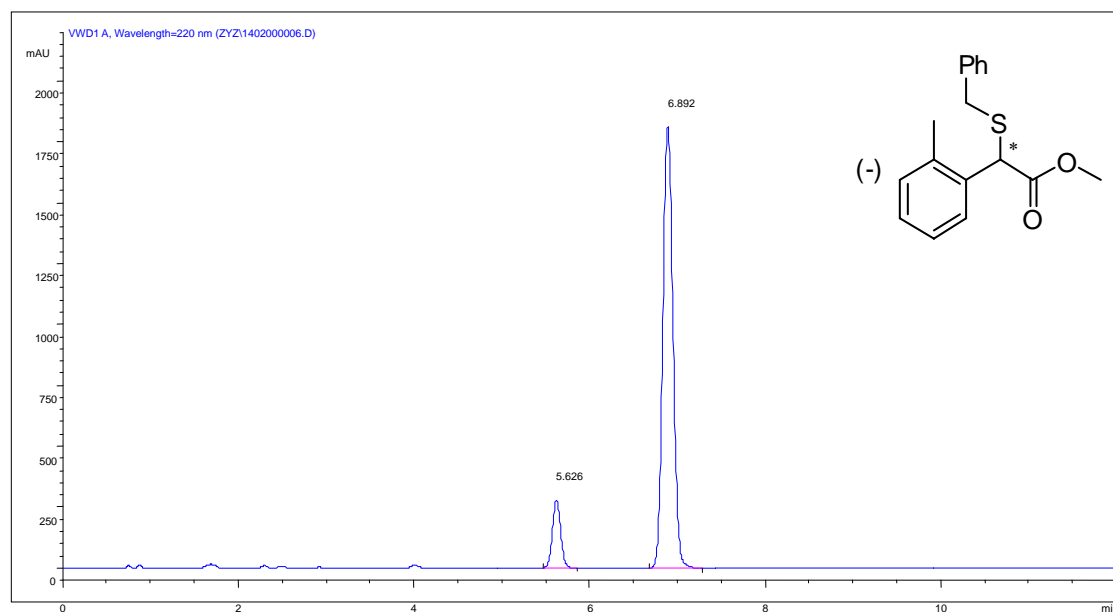

Signal 1: VWD1 A, Wavelength=220 nm

| Peak # | RetTime [min] | Type | Width [min] | Area mAU   | Area %  |
|--------|---------------|------|-------------|------------|---------|
| 1      | 5.626         | BB   | 0.1032      | 1830.85364 | 11.3029 |
| 2      | 6.892         | BB   | 0.1245      | 1.43672e4  | 88.6971 |

**(-)-Methyl 2-(benzylthio)-2-(2-chlorophenyl)acetate (3j)**

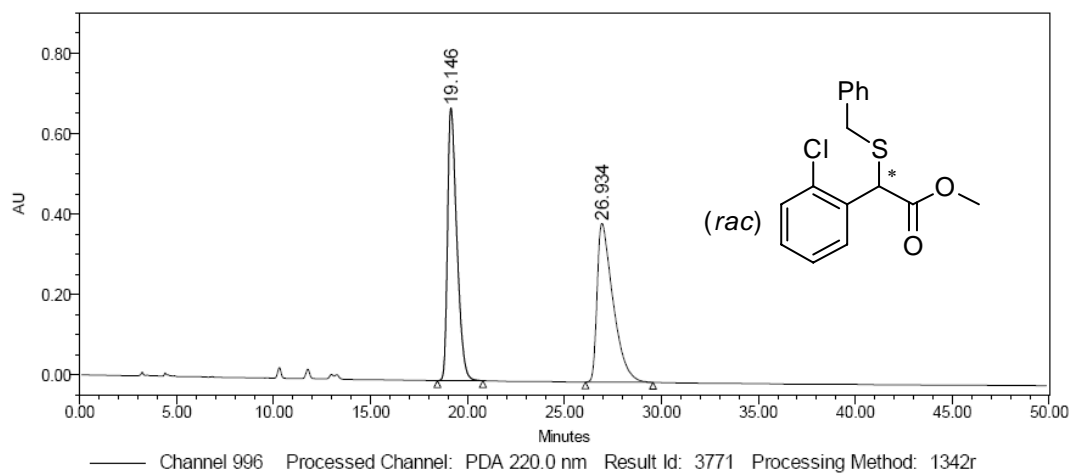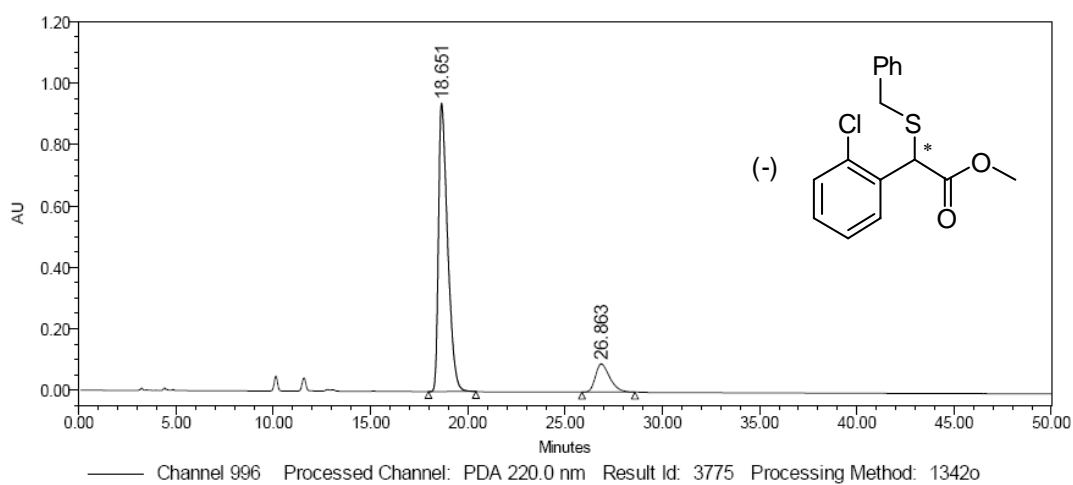

|   | Processed Channel Descr. | RT     | Area     | % Area | Height |
|---|--------------------------|--------|----------|--------|--------|
| 1 | PDA 220.0 nm             | 18.651 | 30730602 | 86.68  | 938963 |
| 2 | PDA 220.0 nm             | 26.863 | 4721589  | 13.32  | 91867  |

**(-)-Methyl 2-(benzylthio)-2-(2-methoxyphenyl)acetate (3k)**

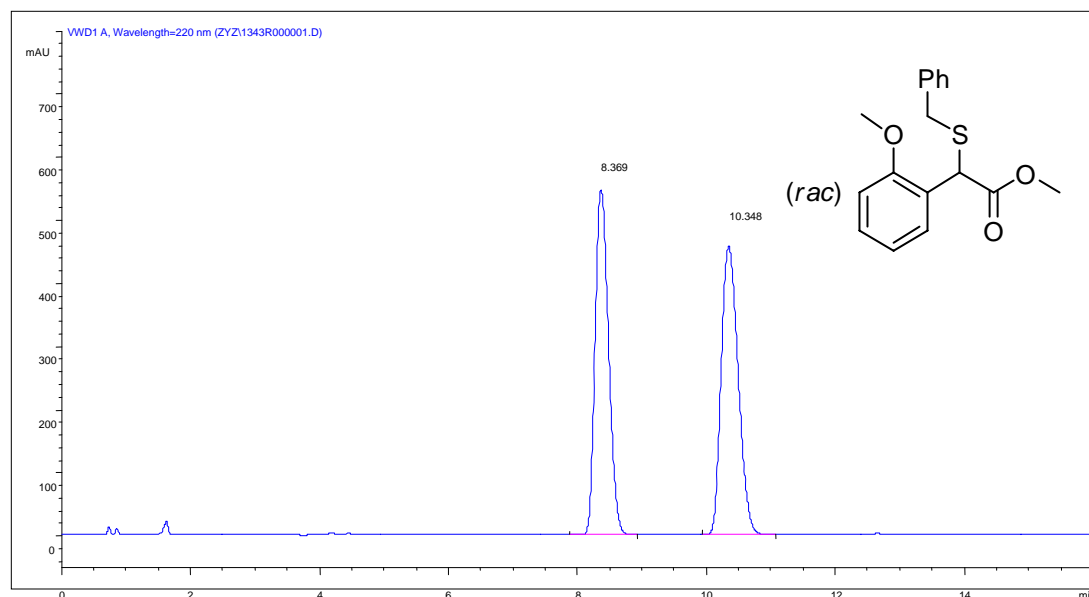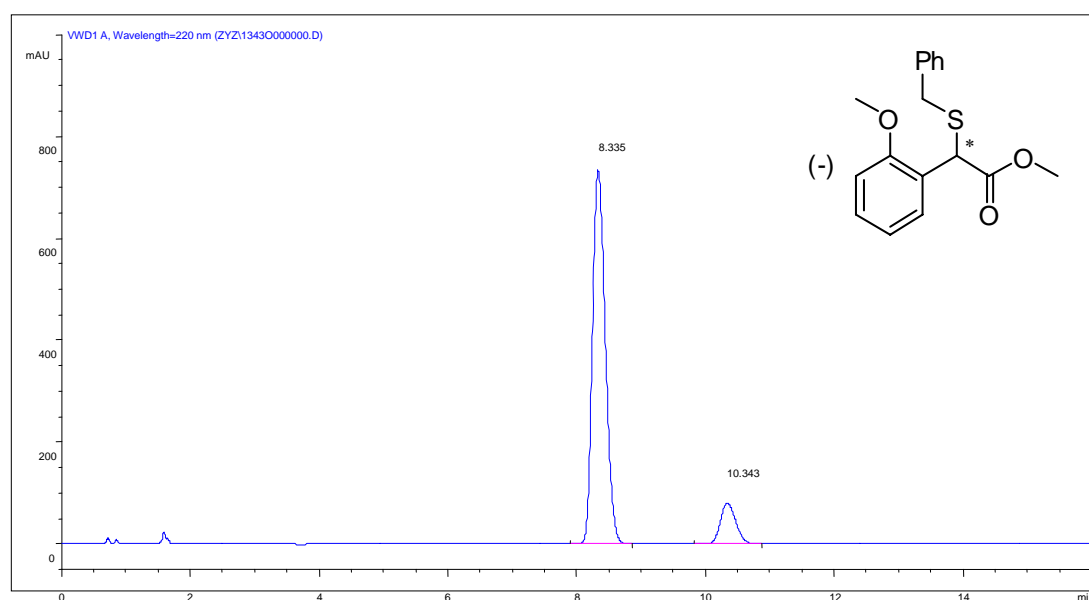

Signal 1: VWD1 A, Wavelength=220 nm

| Peak # | RetTime [min] | Type | Width [min] | Area mAU *s | Area %  |
|--------|---------------|------|-------------|-------------|---------|
| 1      | 8.335         | VB   | 0.2190      | 1.01872e4   | 88.3502 |
| 2      | 10.343        | VV   | 0.2609      | 1343.27637  | 11.6498 |

**(-)-Methyl 2-(benzylthio)-2-(3-methoxyphenyl)acetate (3l)**

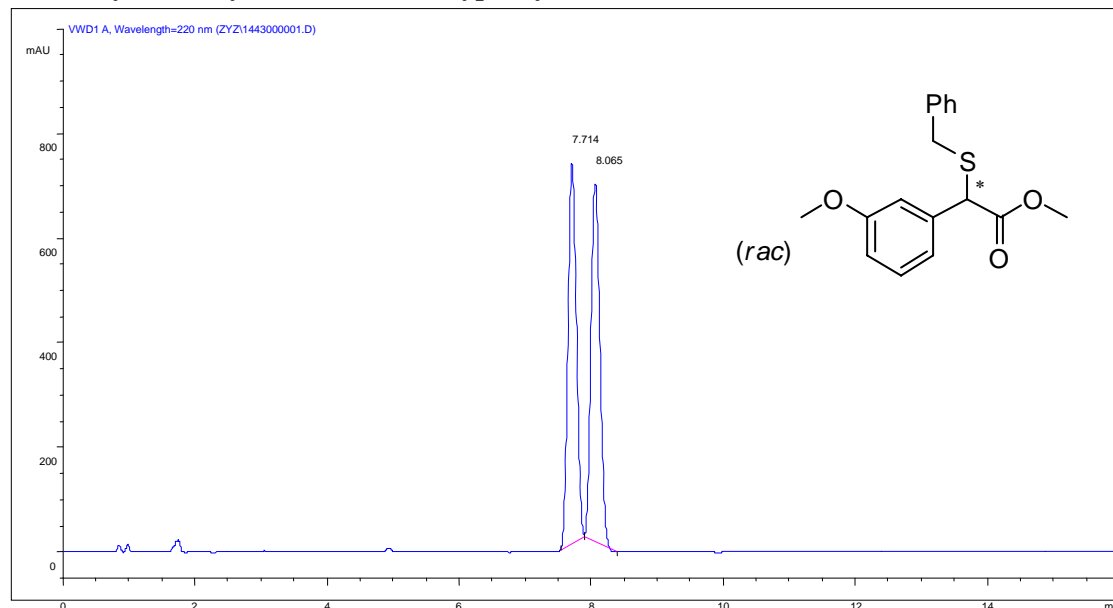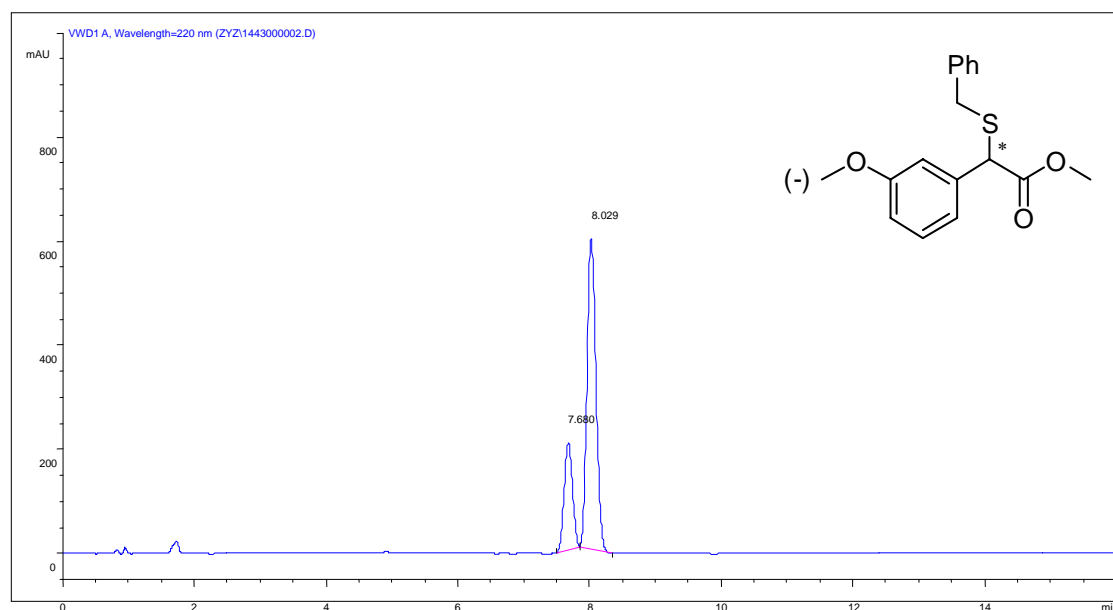

Signal 1: VWD1 A, Wavelength=220 nm

| Peak # | RetTime [min] | Type | Width [min] | Area mAU   | Area %  |
|--------|---------------|------|-------------|------------|---------|
| 1      | 7.680         | BB   | 0.1395      | 1790.57605 | 24.1509 |
| 2      | 8.029         | BB   | 0.1482      | 5623.53613 | 75.8491 |

**(-)-Methyl 2-(benzylthio)-2-(4-methoxyphenyl)acetate (3m)**

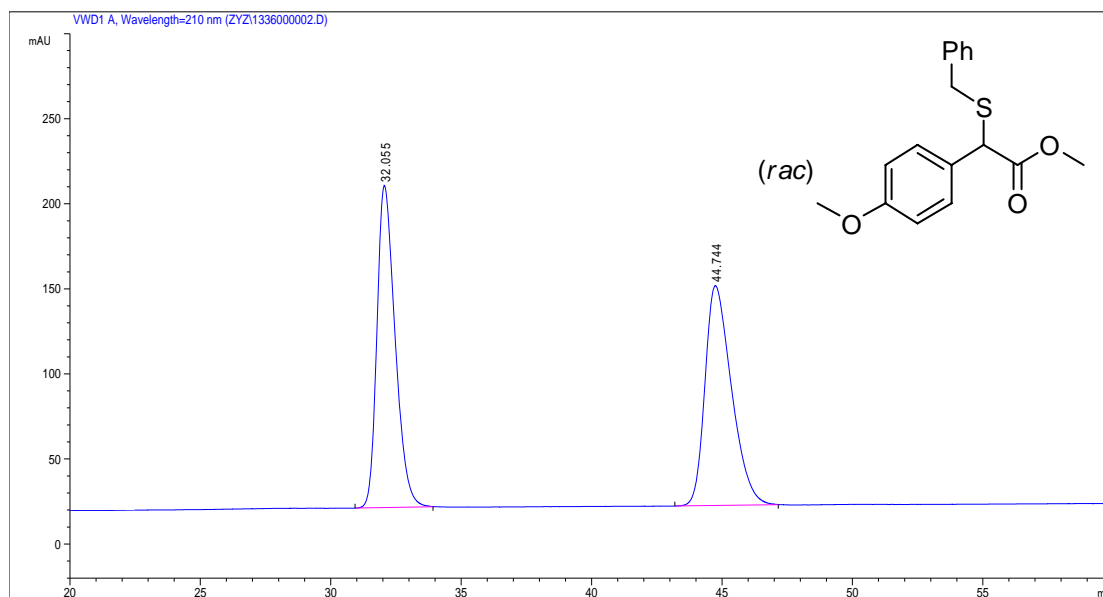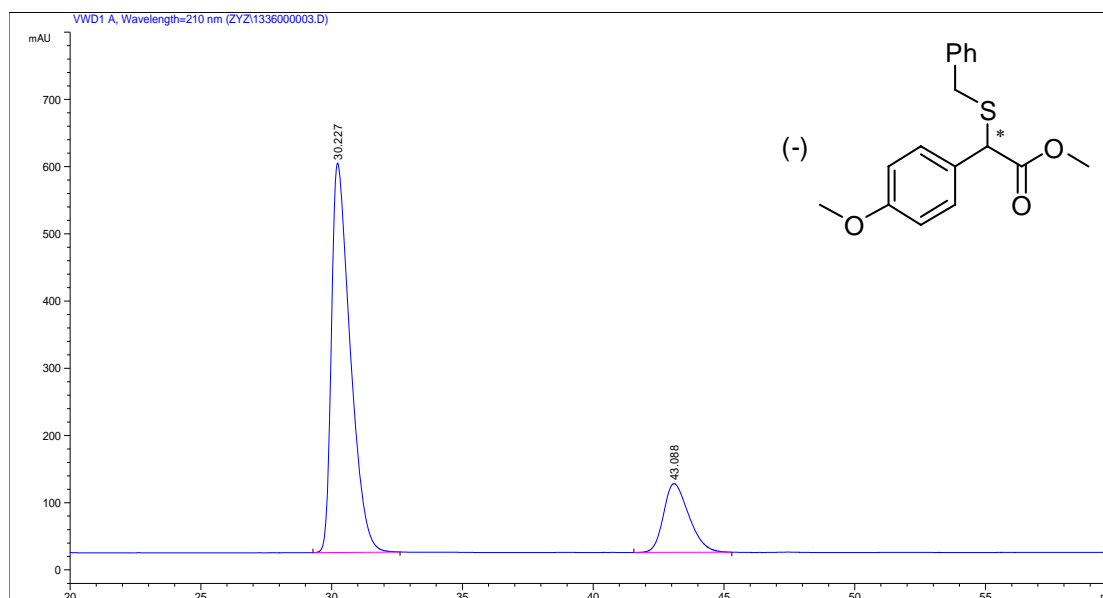

Signal 1: VWD1 A, Wavelength=210 nm

| Peak # | RetTime [min] | Type | Width [min] | Area mAU *s | Height [mAU] | Area %  |
|--------|---------------|------|-------------|-------------|--------------|---------|
| 1      | 30.227        | BB   | 0.7478      | 2.88943e4   | 579.41577    | 80.7311 |
| 2      | 43.088        | BB   | 1.0093      | 6896.48682  | 102.29810    | 19.2689 |

**(+)-Benzyl 2-(phenylthio)propionate (3n)**

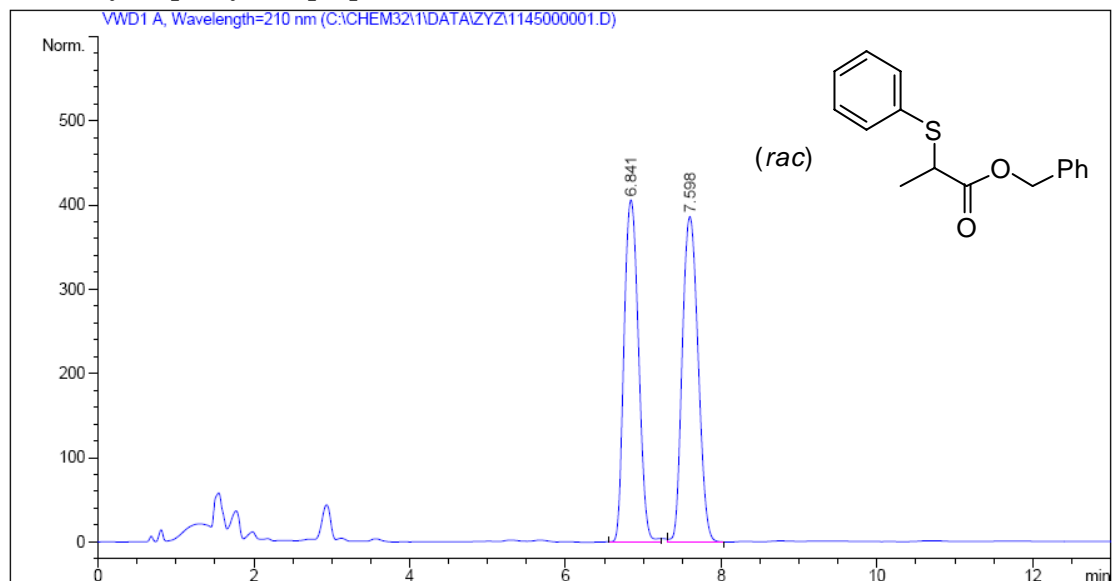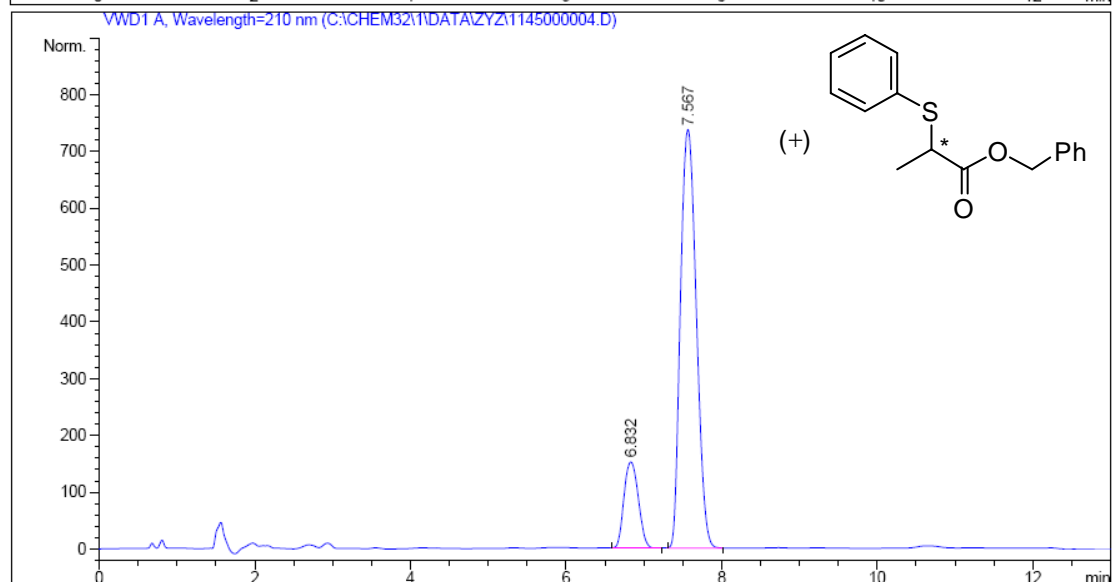

Uncalibrated Peaks:

| Peak # | RetTime [min] | Type | Width [min] | Area mAU   | Area %  |
|--------|---------------|------|-------------|------------|---------|
| 1      | 6.832         | BB   | 0.2091      | 1937.87048 | 15.7010 |
| 2      | 7.567         | BB   | 0.2302      | 1.04045e4  | 84.2990 |

**(+)-benzyl 2-(4-methoxyphenylthio)propionate (3o)**

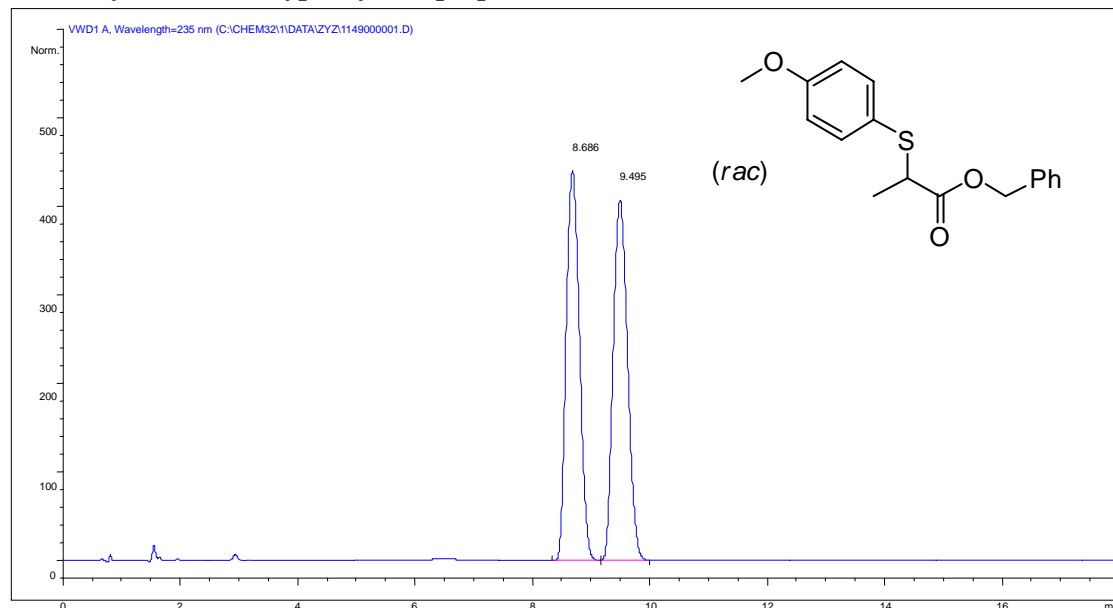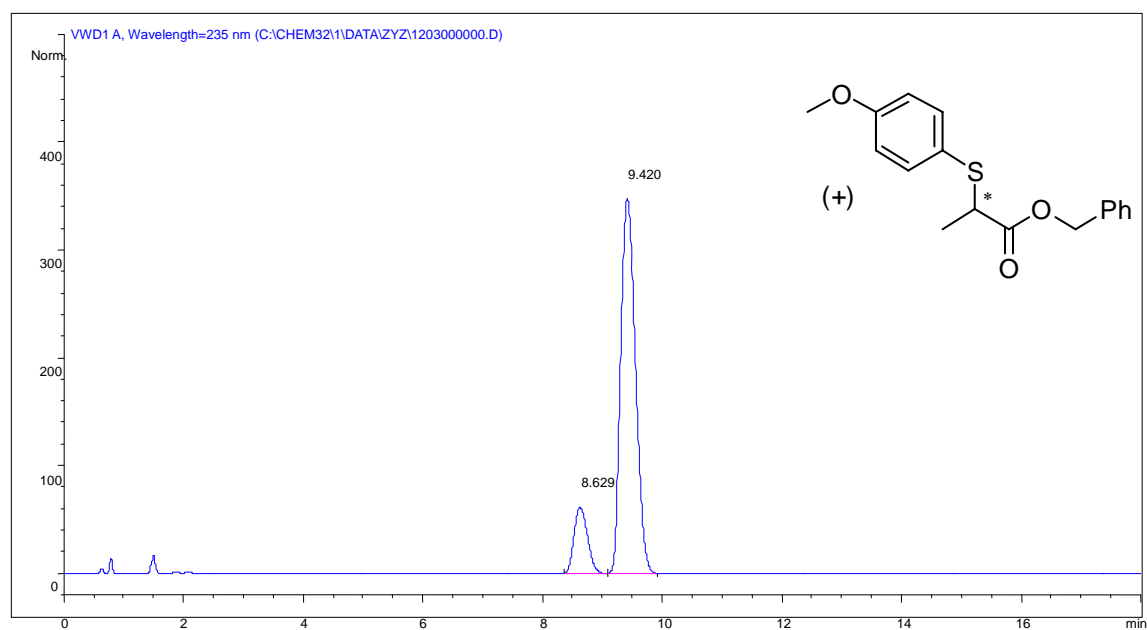

Signal 1: VWD1 A, Wavelength=235 nm

Uncalibrated Peaks:

| Peak # | RetTime [min] | Type | Width [min] | Area mAU   | Area %  |
|--------|---------------|------|-------------|------------|---------|
| 1      | 8.629         | BB   | 0.2526      | 960.95837  | 13.9023 |
| 2      | 9.420         | BB   | 0.2759      | 5951.26123 | 86.0977 |

**(+)-Benzyl 2-(4-chlorophenylthio)propionate (3p)**

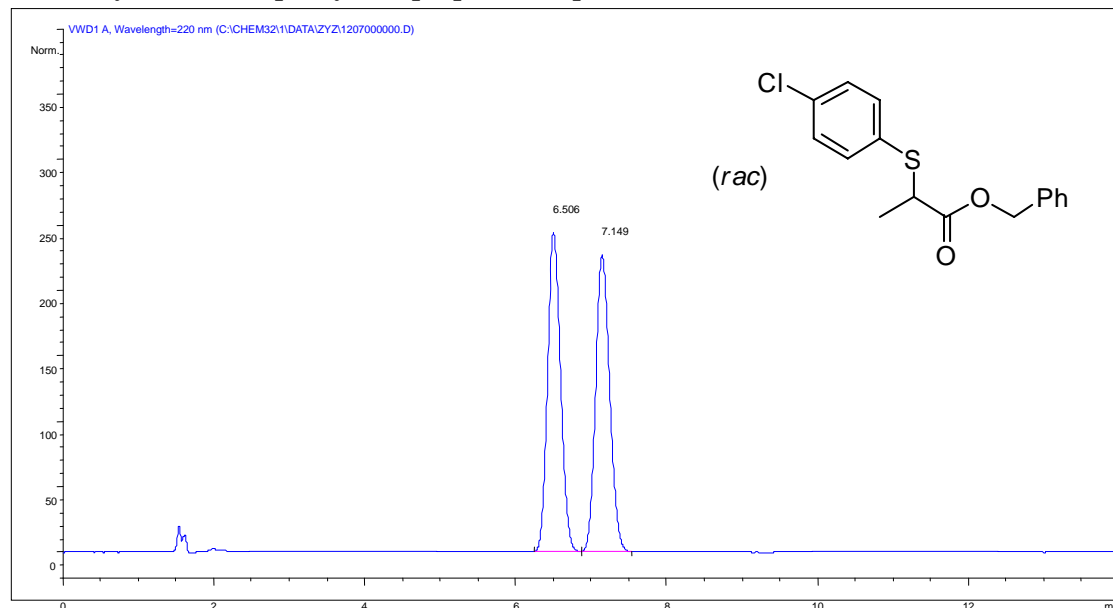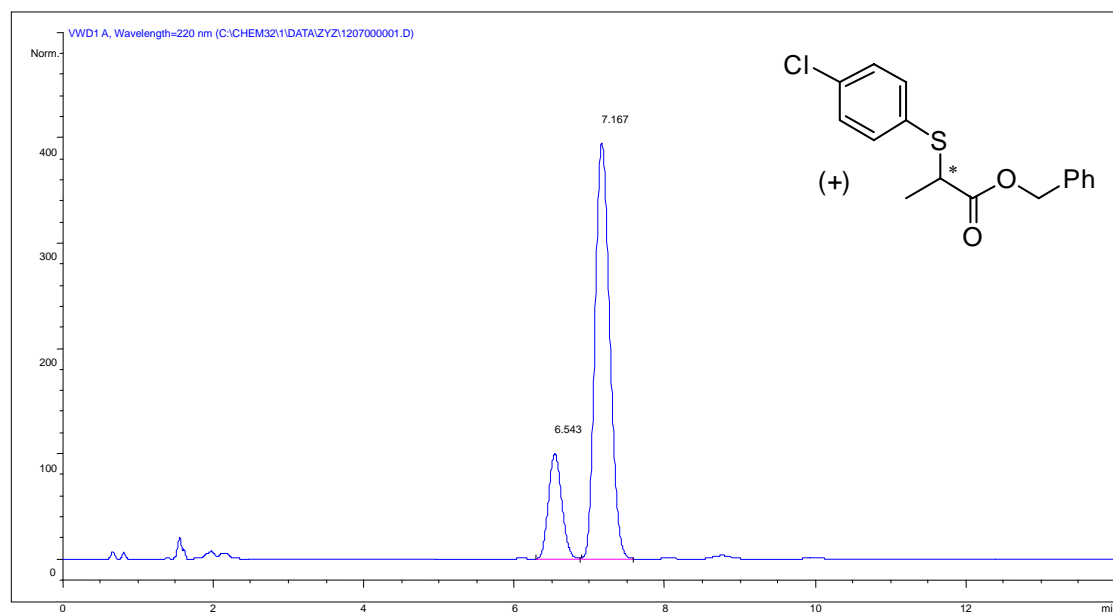

Signal 1: VWD1 A, Wavelength=220 nm

| Peak # | RetTime [min] | Type | Width [min] | Area mAU   | Area %  |
|--------|---------------|------|-------------|------------|---------|
| 1      | 6.543         | BB   | 0.1946      | 1236.89978 | 18.7225 |
| 2      | 7.167         | BB   | 0.2127      | 5369.60156 | 81.2775 |

**(+)-Benzyl 2-(3-methoxyphenylthio)propionate (3q)**

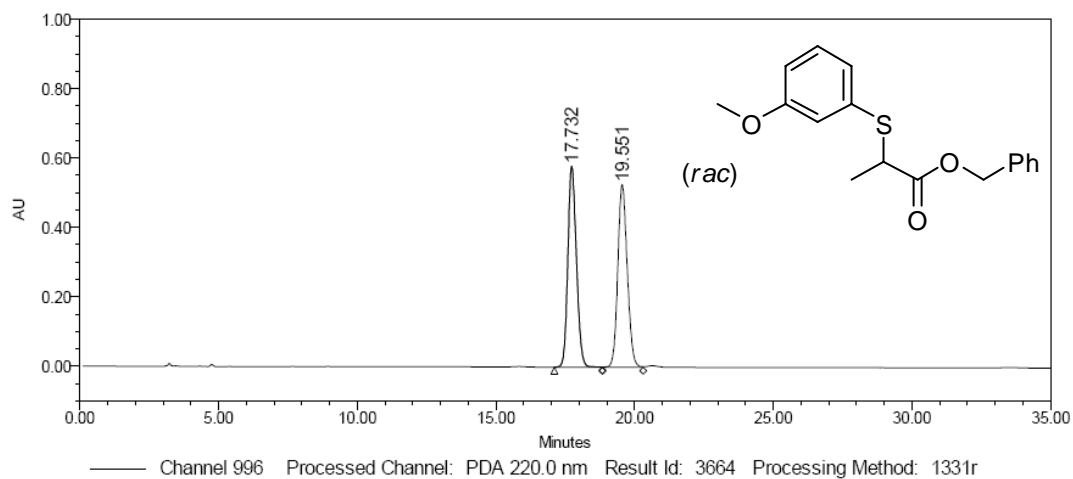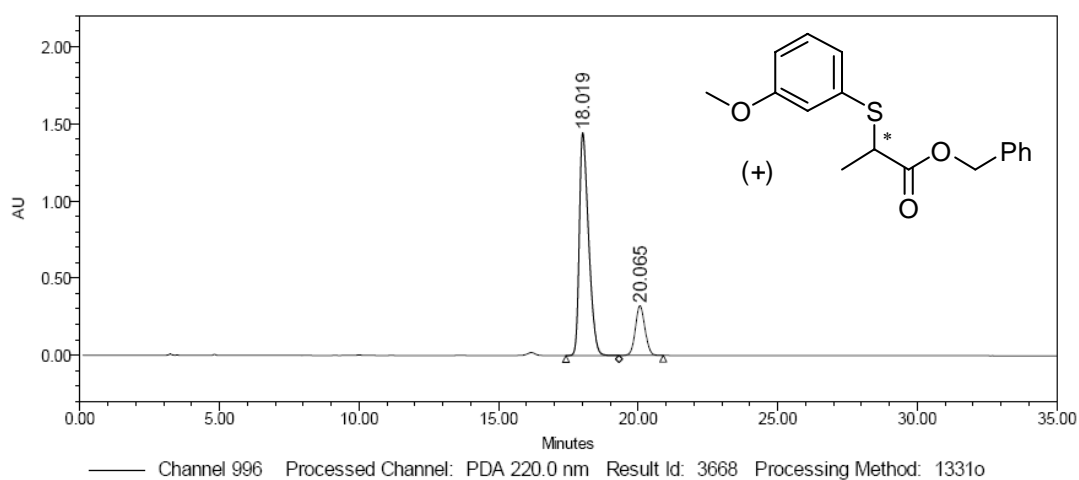

|   | Processed Channel Descr. | RT     | Area     | % Area | Height  |
|---|--------------------------|--------|----------|--------|---------|
| 1 | PDA 220.0 nm             | 18.019 | 33407660 | 81.30  | 1444894 |
| 2 | PDA 220.0 nm             | 20.065 | 7686691  | 18.70  | 322040  |

**(+)-Benzyl 2-(3-chlorophenylthio)propionate (3r)**

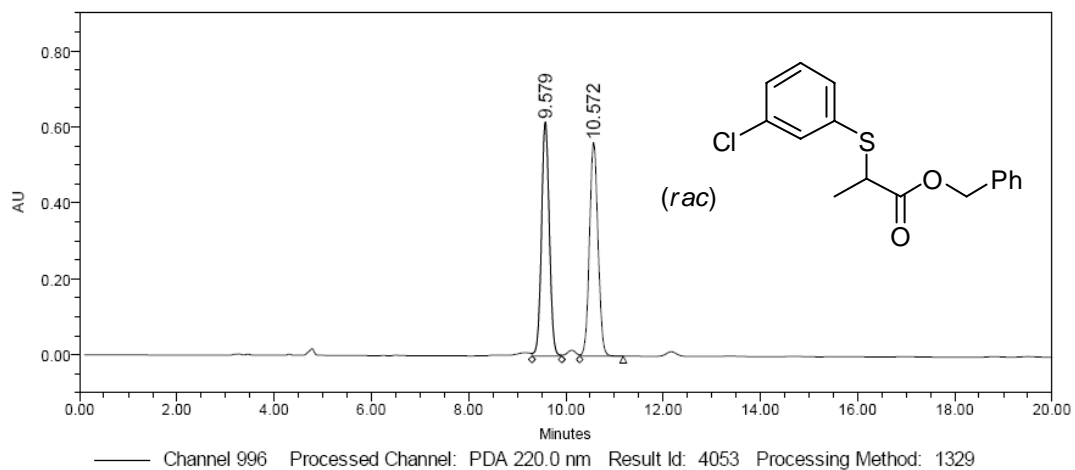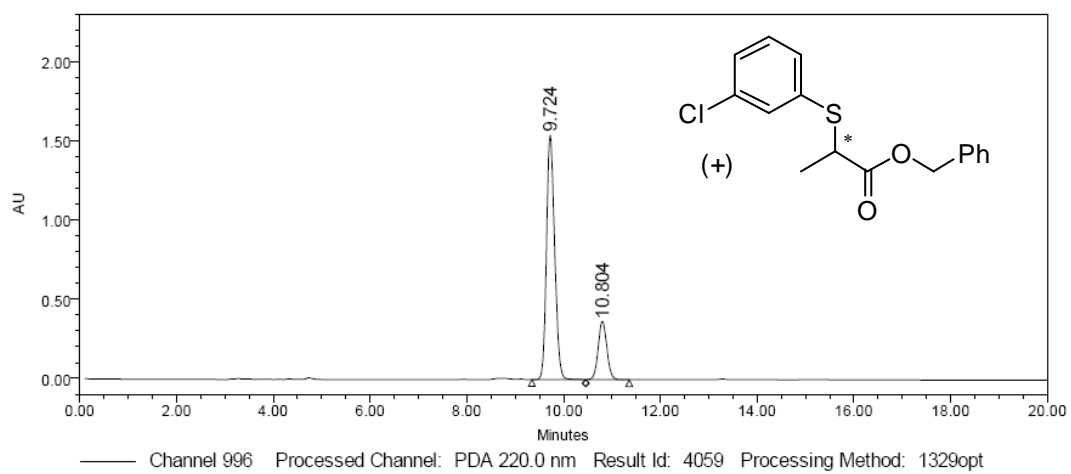

|   | Processed Channel Descr. | RT     | Area     | % Area | Height  |
|---|--------------------------|--------|----------|--------|---------|
| 1 | PDA 220.0 nm             | 9.724  | 18086085 | 79.78  | 1541075 |
| 2 | PDA 220.0 nm             | 10.804 | 4583959  | 20.22  | 367586  |

**(+)-Benzyl 2-(2-methoxyphenylthio)propionate (3s)**

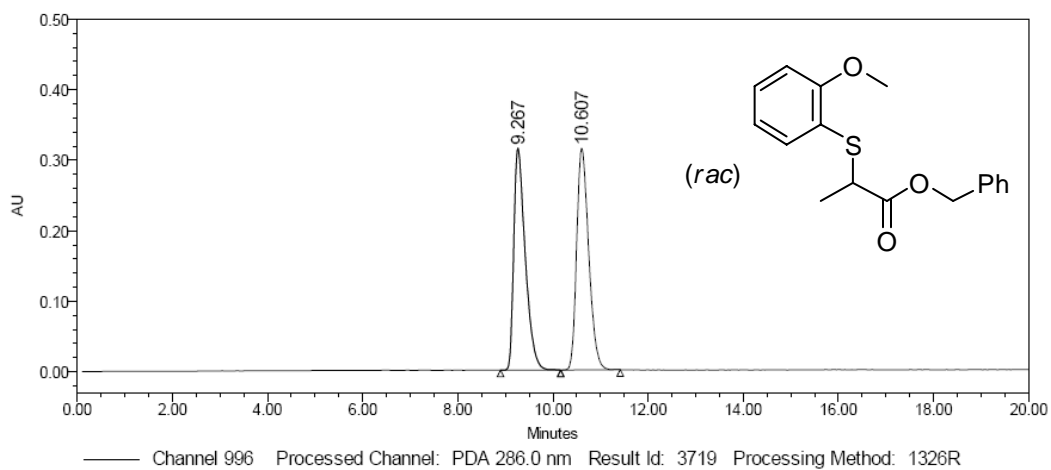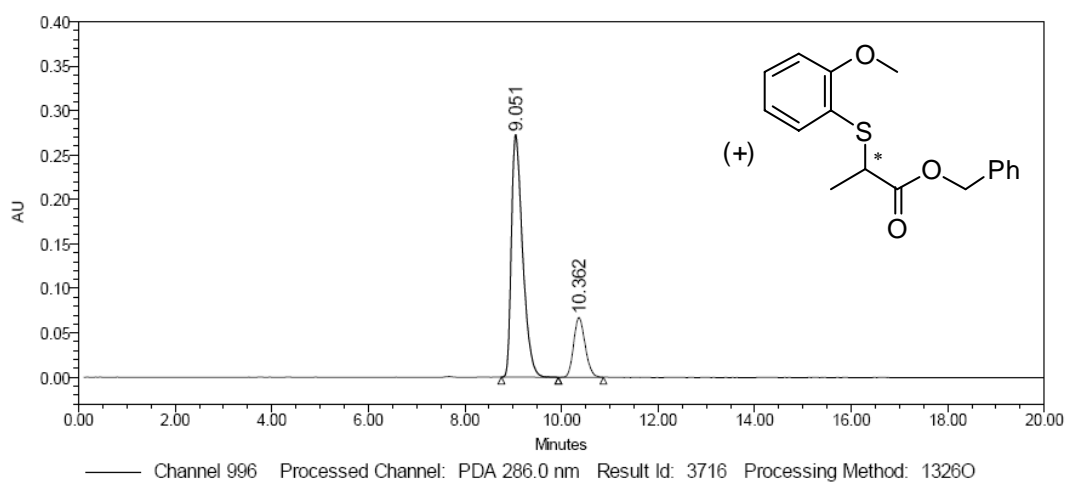

|   | Processed Channel Descr. | RT     | Area    | % Area | Height |
|---|--------------------------|--------|---------|--------|--------|
| 1 | PDA 286.0 nm             | 9.051  | 4409879 | 79.90  | 272965 |
| 2 | PDA 286.0 nm             | 10.362 | 1109446 | 20.10  | 67157  |

**(+)-Benzyl 2-(2-chlorophenylthio)propionate (3t)**

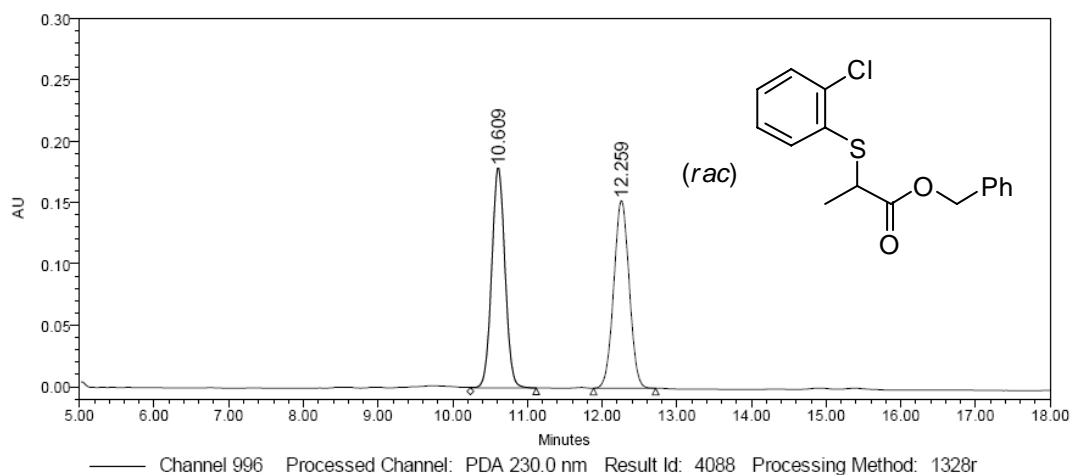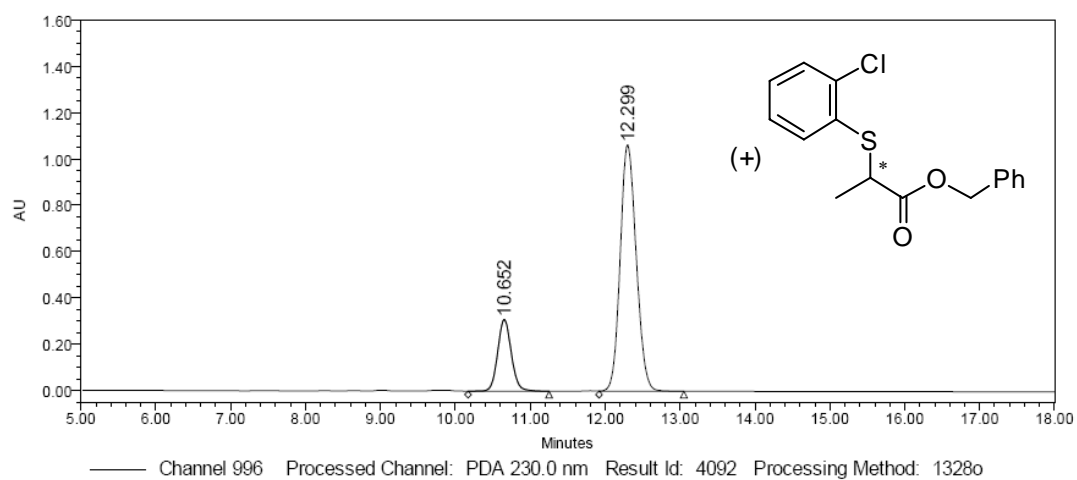

|   | Processed Channel Descr. | RT     | Area     | % Area | Height  |
|---|--------------------------|--------|----------|--------|---------|
| 1 | PDA 230.0 nm             | 10.652 | 3892385  | 19.77  | 309703  |
| 2 | PDA 230.0 nm             | 12.299 | 15794814 | 80.23  | 1063973 |

**(+)-Benzyl 2-(2,6-dichlorophenylthio)propionate (3u)**

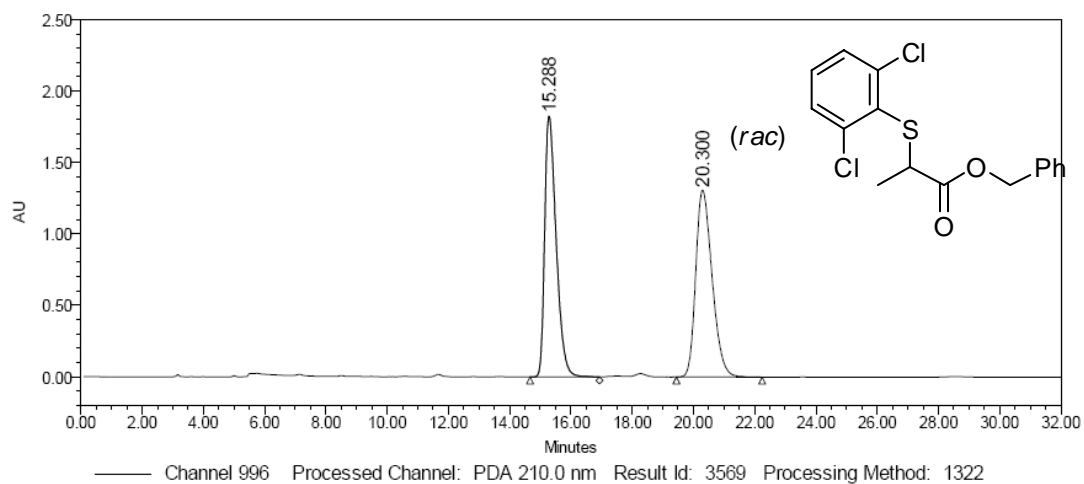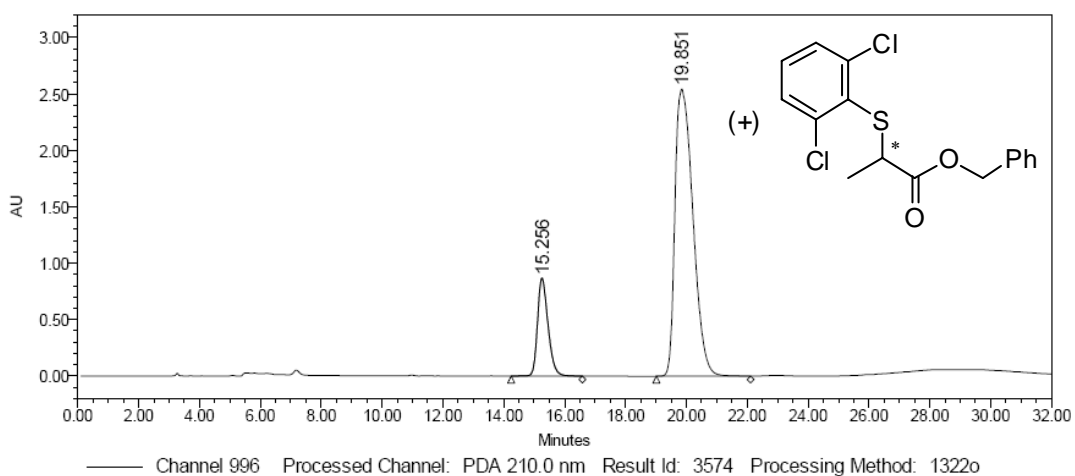

|   | Processed Channel Descr. | RT     | Area      | % Area | Height  |
|---|--------------------------|--------|-----------|--------|---------|
| 1 | PDA 210.0 nm             | 15.256 | 20908889  | 16.71  | 868938  |
| 2 | PDA 210.0 nm             | 19.851 | 104247080 | 83.29  | 2542674 |

### 2-(Butylthio)-N-phenylpropanamide (3v)

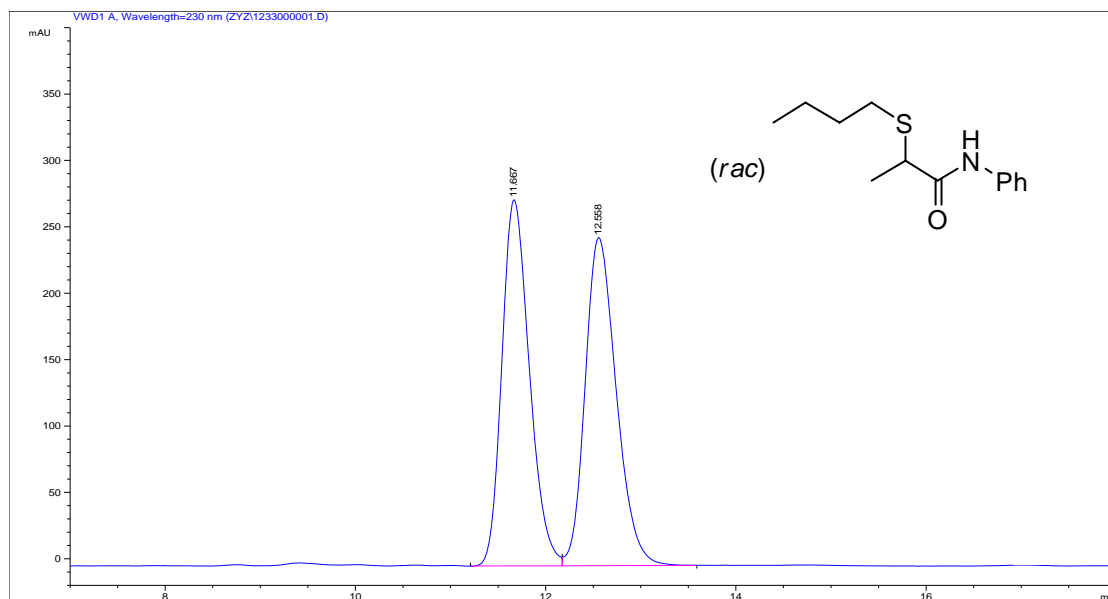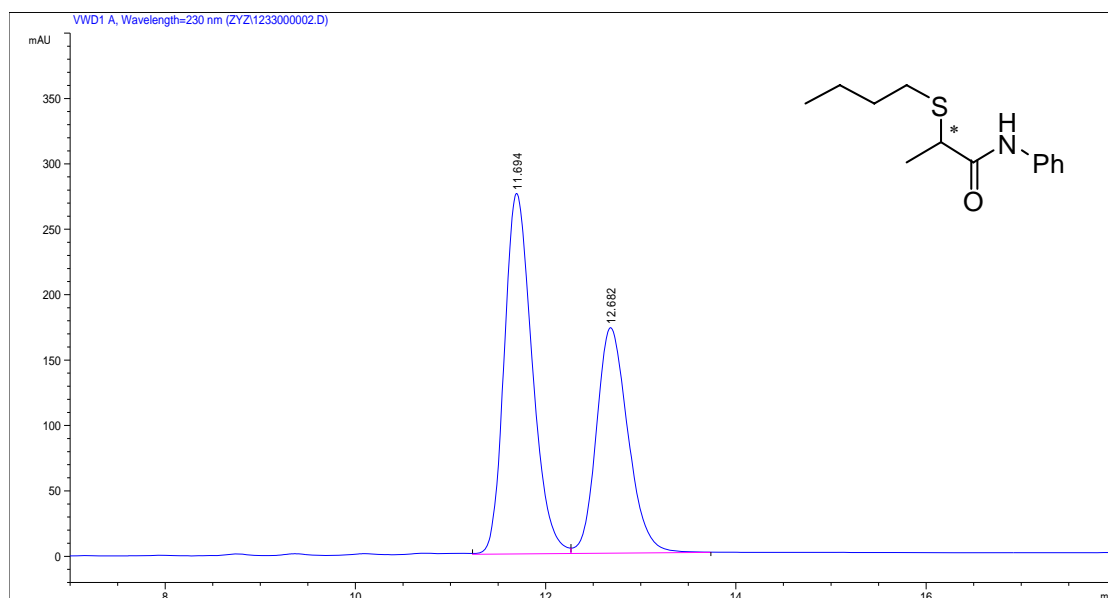

| Peak # | RetTime [min] | Type | Width [min] | Area mAU   | Height [mAU] | Area %  |
|--------|---------------|------|-------------|------------|--------------|---------|
| 1      | 11.694        | VV   | 0.3149      | 5615.97607 | 275.63489    | 58.5500 |
| 2      | 12.682        | VB   | 0.3564      | 3975.78467 | 172.42783    | 41.4500 |

### 2-(Isobutylthio)-N-phenylpropanamide (3w)

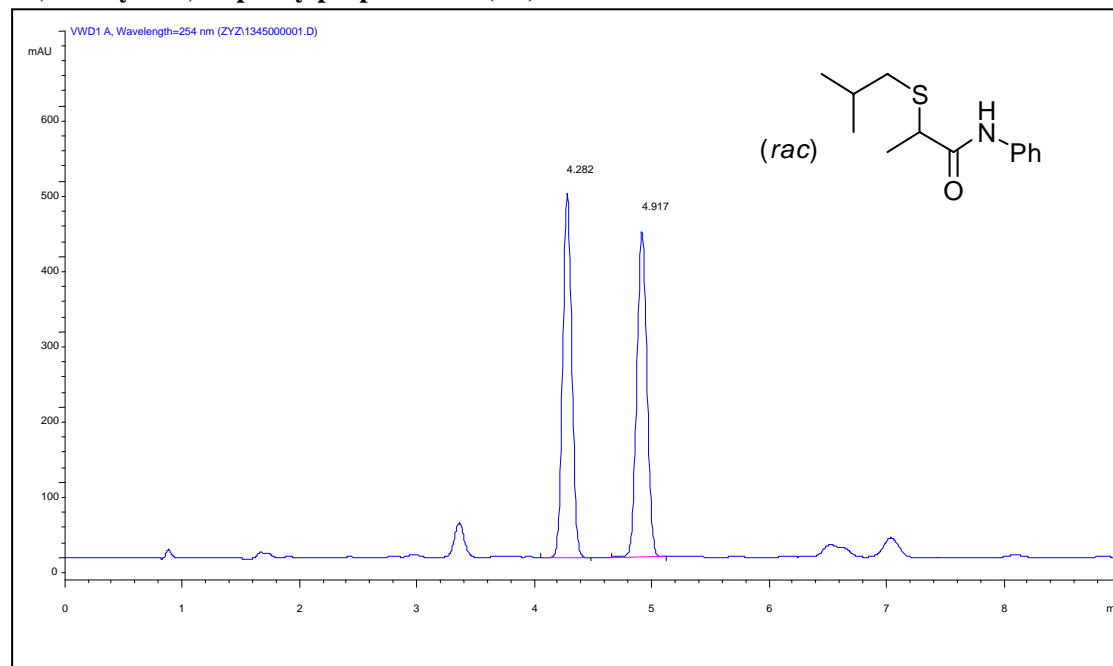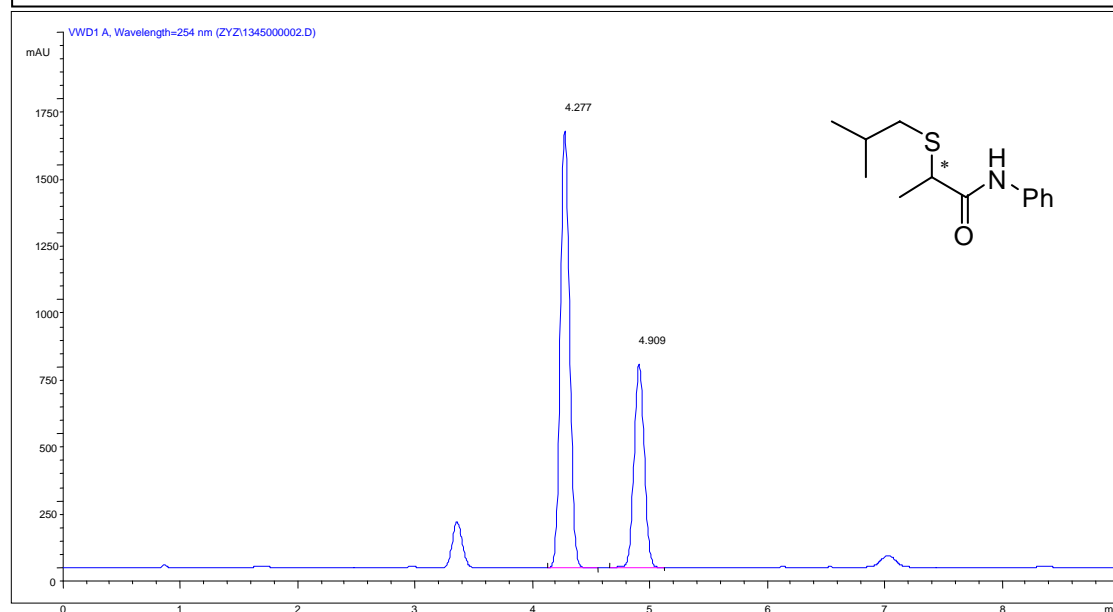

Signal 1: VWD1 A, Wavelength=254 nm

Uncalibrated Peaks:

| Peak # | RetTime [min] | Type | Width [min] | Area mAU   | Area %  |
|--------|---------------|------|-------------|------------|---------|
| 1      | 4.277         | BB   | 0.0876      | 8983.45703 | 65.9656 |
| 2      | 4.909         | BB   | 0.0957      | 4634.93750 | 34.0344 |

**(+)-Benzyl 2-(isopropylthio)propionate (3x)**

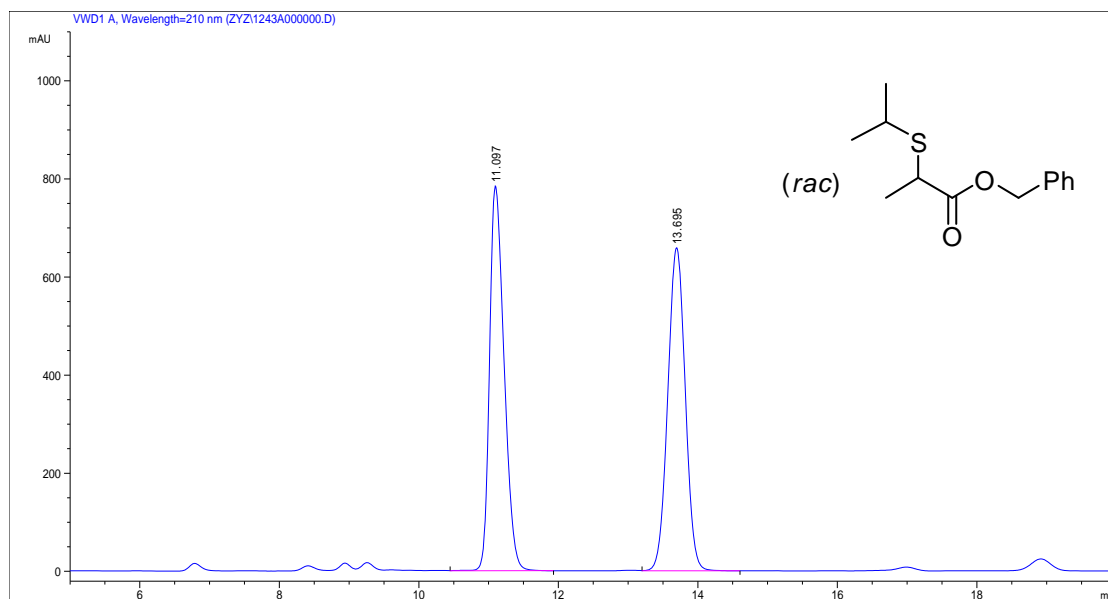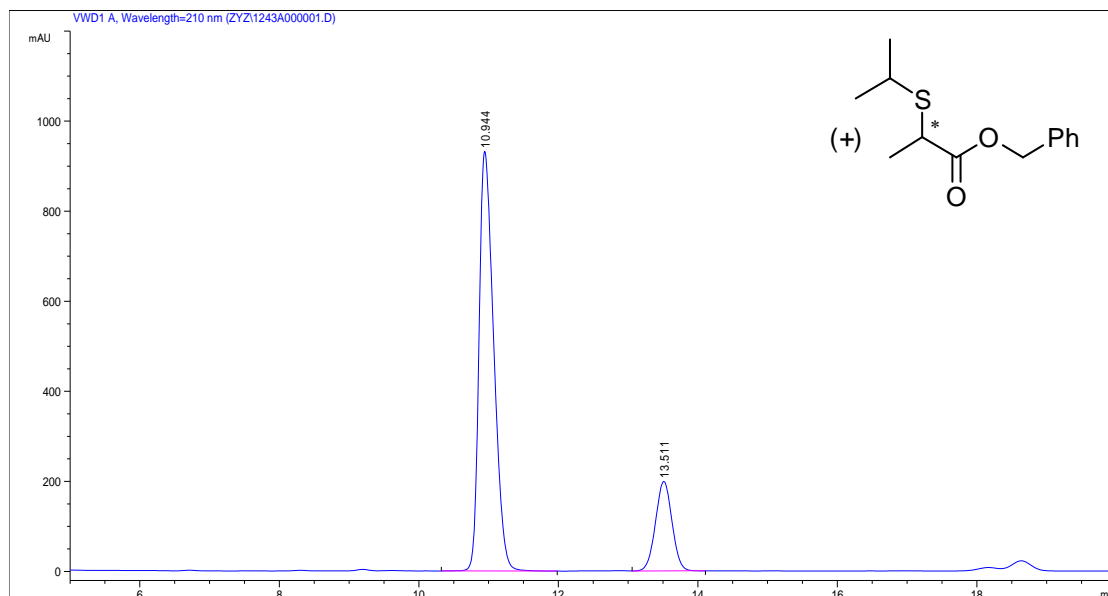

Signal 1: VWD1 A, Wavelength=210 nm

| Peak # | RetTime [min] | Type | Width [min] | Area mAU *s | Height [mAU] | Area %  |
|--------|---------------|------|-------------|-------------|--------------|---------|
| 1      | 10.944        | BB   | 0.2268      | 1.35780e4   | 931.71515    | 80.6082 |
| 2      | 13.511        | VB   | 0.2558      | 3266.45288  | 198.72371    | 19.3918 |

**(+)-Benzyl 2-(tritylthio)propionate (3y)**

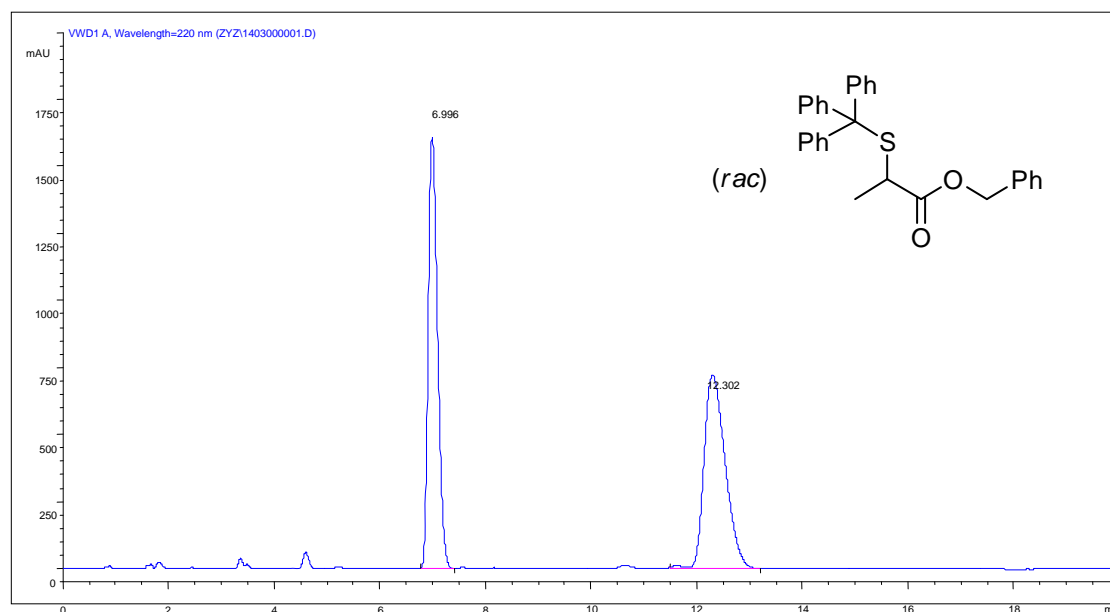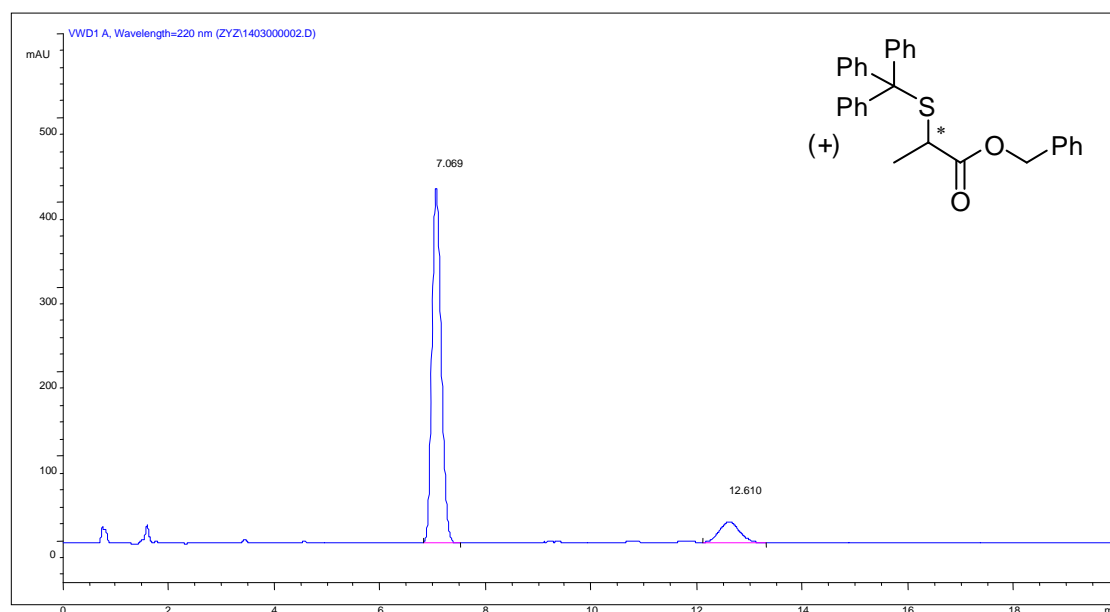

Signal 1: VWD1 A, Wavelength=220 nm

| Peak # | RetTime [min] | Type | Width [min] | Area mAU   | Area %  |
|--------|---------------|------|-------------|------------|---------|
| 1      | 7.069         | BB   | 0.1905      | 5130.22949 | 88.5245 |
| 2      | 12.610        | BB   | 0.4210      | 665.03790  | 11.4755 |

### Benzyl 2-(benzoylthio)propionate

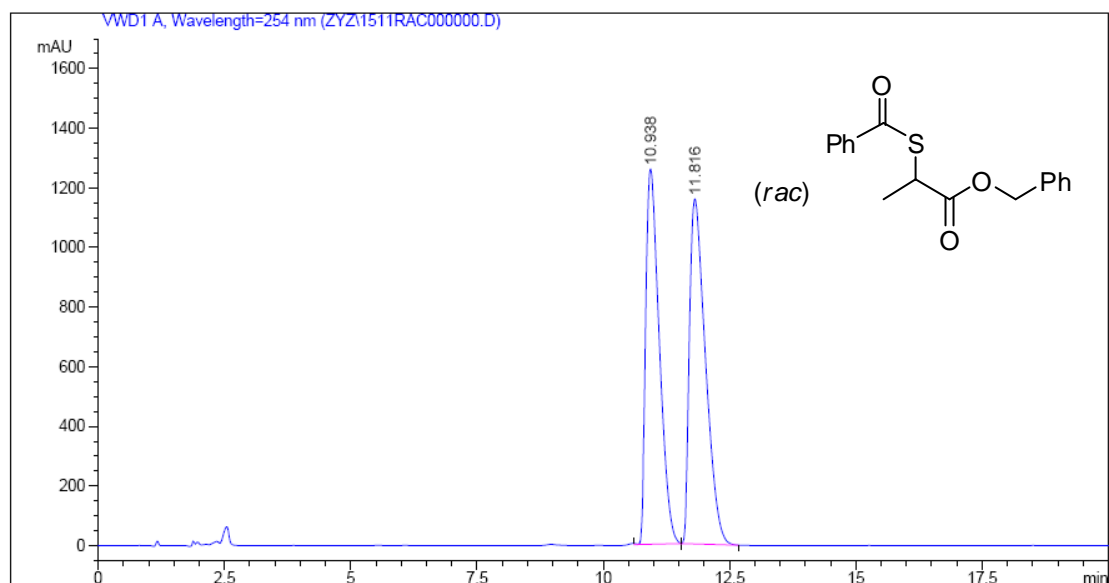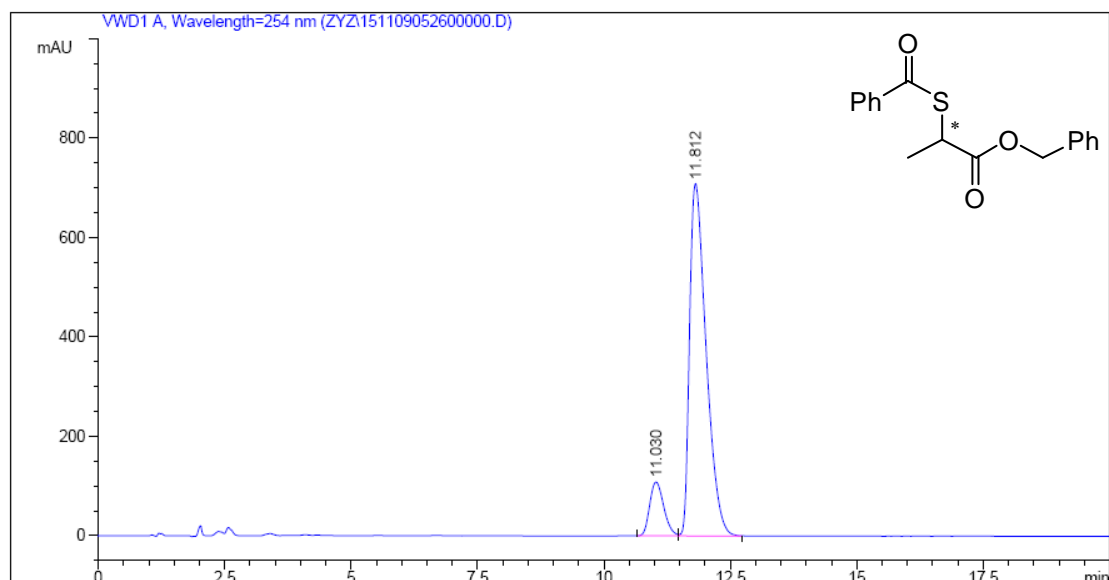

Signal 1: VWD1 A, Wavelength=254 nm

Uncalibrated Peaks:

| Peak # | RetTime [min] | Type | Width [min] | Area mAU   | Area %  |
|--------|---------------|------|-------------|------------|---------|
| 1      | 11.030        | BV   | 0.3039      | 2091.11401 | 11.4962 |
| 2      | 11.812        | VB   | 0.3464      | 1.60984e4  | 88.5038 |
